# Supplementary material for: What’s the effectiveness of stocking actions in small creeks? The role of water discharge behind hatchery trout downstream movement
Source: PeerJ journal article supplement (doi:10.7717/peerj.14069), 2022-09-26

# Residuals NFDD upstream

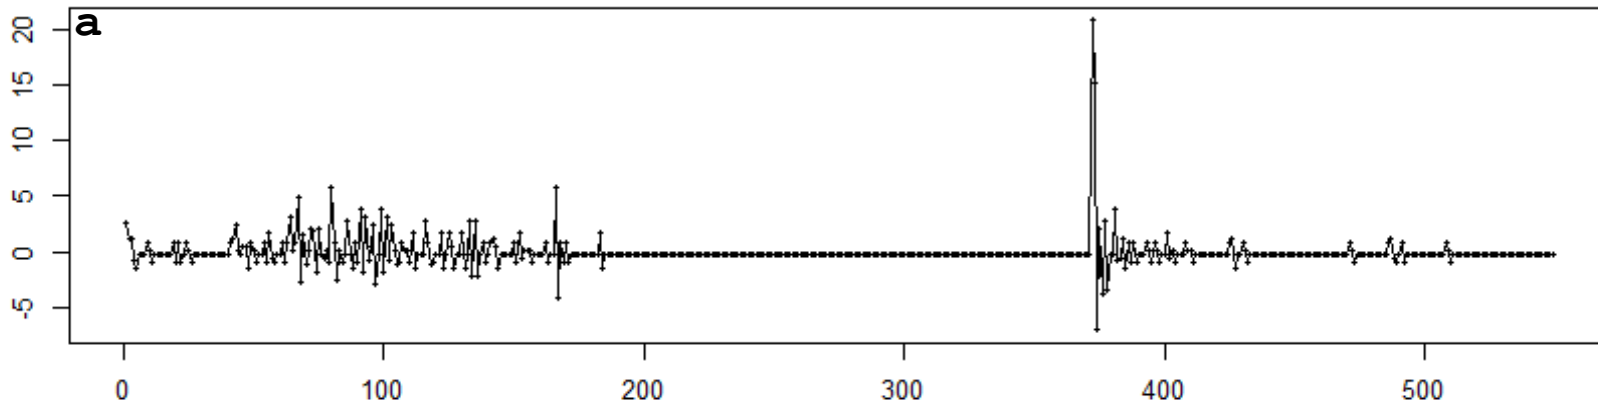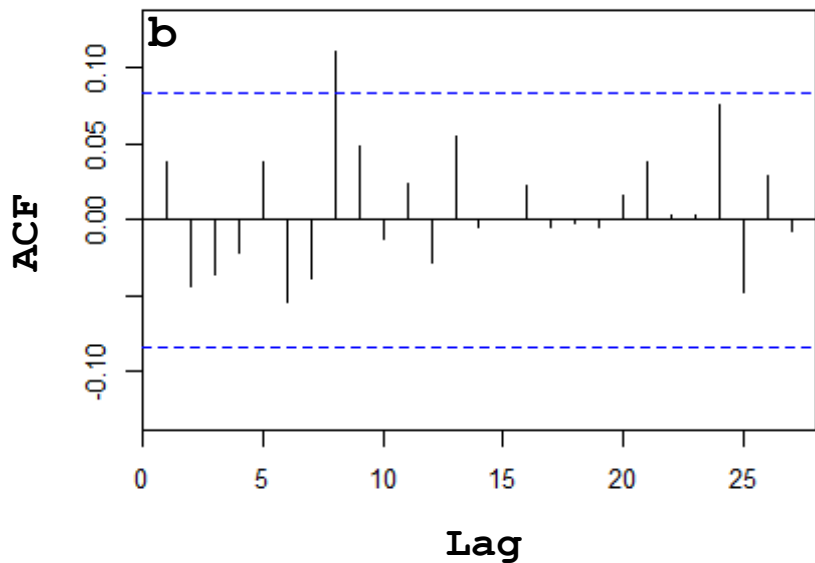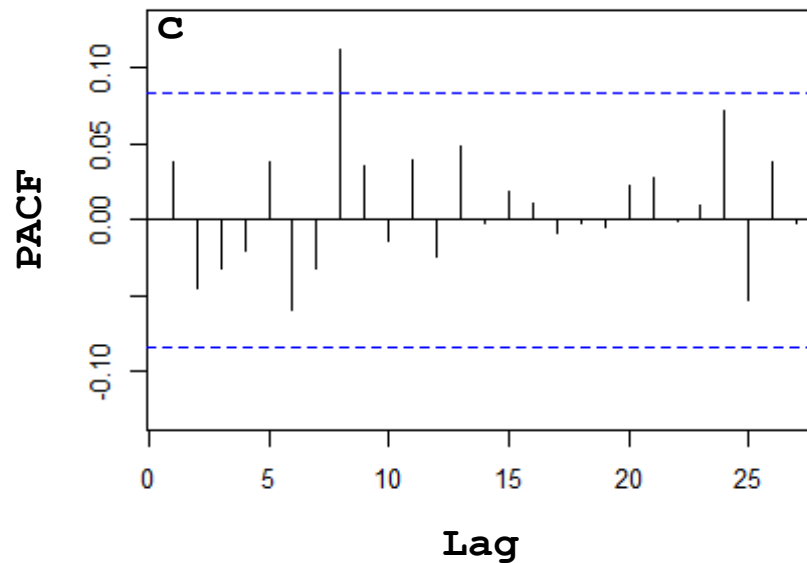

Supplement: Figure_S1.pdf [file Figure_S1.pdf]
