# Supplementary material for: What’s the effectiveness of stocking actions in small creeks? The role of water discharge behind hatchery trout downstream movement
Source: PeerJ. 2022 Sep 26;10:e14069. doi: 10.7717/peerj.14069 (PMC9521347; doi:10.7717/peerj.14069)
Supplement: Supplemental Information 4 — Filtered data between fish detected upstream or downstream the antenna and wild fish, plus the daily water discharge, the data of hatchery fish released in the site and the data of wild fish marked in the field. [file peerj-10-14069-s004.xlsx]

## Sheet: Raw data
Scan Date	Scan Time	Download Date	Download Time	HEX Tag ID	DEC Tag ID		In this sheet you can find the raw data downloaded from the PIT tag antenna master controller ponitioned on Laveggio Creek.
08.28.2020	03:19:19.120	09.09.2020	09:56:28	3E7.0000001D01	999.000000007425		Scan date is the day in which a fish has been registered, and Scan time the exact time. HEX and DEC tag ID are two ways of writing a PIT tag code, we normally use the DEC tag format.
08.28.2020	03:19:19.170	09.09.2020	09:56:28	3E7.0000001D02	999.000000007426
10.29.2020	22:16:11.690	11.01.2020	14:09:01	3DD.003D7A9F29	989.001031446313
10.29.2020	20:29:43.470	11.01.2020	14:08:33	3DD.003D7A9FC1	989.001031446465
10.29.2020	21:37:47.660	11.01.2020	14:09:01	3DD.003D7A9F37	989.001031446327
10.29.2020	22:17:44.660	11.01.2020	14:09:03	3DD.003D7A9F3F	989.001031446335
10.30.2020	19:22:42.430	11.01.2020	14:09:08	3DD.003D7A9F1C	989.001031446300
10.30.2020	21:29:31.460	11.01.2020	14:09:49	3DD.003D7A9E1C	989.001031446044
10.30.2020	21:50:41.640	11.01.2020	14:10:04	3DD.003D7A9F45	989.001031446341
10.30.2020	03:33:38.030	11.01.2020	14:09:03	3DD.003D7A9FAF	989.001031446447
10.30.2020	17:45:27.300	11.01.2020	14:09:05	3DD.003D7A9E28	989.001031446056
10.30.2020	20:42:24.360	11.01.2020	14:09:46	3DD.003D7A9F75	989.001031446389
10.30.2020	21:11:02.350	11.01.2020	14:09:49	3DD.003D7A9FA6	989.001031446438
10.30.2020	22:02:53.740	11.01.2020	14:10:16	3DD.003D7A9FA3	989.001031446435
10.30.2020	23:51:50.210	11.01.2020	14:12:13	3DD.003D7A9F4D	989.001031446349
10.31.2020	02:45:29.780	11.01.2020	14:12:44	3DD.003D7A9E44	989.001031446084
10.31.2020	06:15:06.190	11.01.2020	14:12:48	3DD.003D7A9E1A	989.001031446042
10.31.2020	08:02:20.190	11.01.2020	14:13:05	3DD.003D7A9F90	989.001031446416
10.31.2020	08:02:21.720	11.01.2020	14:13:05	3DD.003D7A9F49	989.001031446345
10.31.2020	19:20:47.980	11.01.2020	14:13:07	3DD.003D7A9F21	989.001031446305
10.31.2020	21:04:00.610	11.01.2020	14:13:13	3DD.003D7A9E4B	989.001031446091
10.31.2020	21:35:45.340	11.01.2020	14:13:21	3DD.003D7A9F8D	989.001031446413
10.31.2020	01:48:43.500	11.01.2020	14:12:33	3DD.003D7A9E29	989.001031446057
10.31.2020	04:17:29.970	11.01.2020	14:12:45	3DD.003D7A9E19	989.001031446041
10.31.2020	08:15:15.770	11.01.2020	14:13:06	3DD.003D7A9E37	989.001031446071
10.31.2020	12:19:01.560	11.01.2020	14:13:06	3DD.003D7A9F24	989.001031446308
10.31.2020	15:38:25.030	11.01.2020	14:13:06	3DD.003D7A9F74	989.001031446388
10.31.2020	21:46:02.810	11.01.2020	14:13:32	3DD.003D7A9F31	989.001031446321
10.31.2020	22:53:44.330	11.01.2020	14:16:09	3DD.003D7A9F72	989.001031446386
10.31.2020	23:06:28.230	11.01.2020	14:16:14	3DD.003D7A9F68	989.001031446376
11.01.2020	14:06:04.780	11.01.2020	14:16:20	3DD.0077C60C50	989.002009467984
11.01.2020	02:08:21.220	11.01.2020	14:16:17	3DD.003D7A9DEB	989.001031445995
11.05.2020	17:28:30.520	11.09.2020	10:35:41	3DD.003D7A9E1B	989.001031446043
11.05.2020	17:28:30.630	11.09.2020	10:35:41	3DD.003D7A9E1B	989.001031446043
11.05.2020	17:28:30.720	11.09.2020	10:35:41	3DD.003D7A9E1B	989.001031446043
11.05.2020	17:28:30.850	11.09.2020	10:35:41	3DD.003D7A9E1B	989.001031446043
11.05.2020	17:28:30.980	11.09.2020	10:35:41	3DD.003D7A9E1B	989.001031446043
11.05.2020	17:28:31.110	11.09.2020	10:35:41	3DD.003D7A9E1B	989.001031446043
11.05.2020	17:28:31.240	11.09.2020	10:35:41	3DD.003D7A9E1B	989.001031446043
11.05.2020	17:28:31.340	11.09.2020	10:35:41	3DD.003D7A9E1B	989.001031446043
11.05.2020	17:28:31.460	11.09.2020	10:35:41	3DD.003D7A9E1B	989.001031446043
11.05.2020	17:28:31.590	11.09.2020	10:35:41	3DD.003D7A9E1B	989.001031446043
11.05.2020	17:28:31.670	11.09.2020	10:35:41	3DD.003D7A9E1B	989.001031446043
11.05.2020	17:28:31.810	11.09.2020	10:35:41	3DD.003D7A9E1B	989.001031446043
11.05.2020	17:28:31.930	11.09.2020	10:35:41	3DD.003D7A9E1B	989.001031446043
11.05.2020	17:28:32.060	11.09.2020	10:35:41	3DD.003D7A9E1B	989.001031446043
11.05.2020	17:28:32.190	11.09.2020	10:35:41	3DD.003D7A9E1B	989.001031446043
11.05.2020	17:28:32.310	11.09.2020	10:35:41	3DD.003D7A9E1B	989.001031446043
11.05.2020	17:28:32.420	11.09.2020	10:35:41	3DD.003D7A9E1B	989.001031446043
11.05.2020	17:28:32.530	11.09.2020	10:35:41	3DD.003D7A9E1B	989.001031446043
11.05.2020	17:28:32.630	11.09.2020	10:35:41	3DD.003D7A9E1B	989.001031446043
11.05.2020	17:28:32.720	11.09.2020	10:35:41	3DD.003D7A9E1B	989.001031446043
11.05.2020	17:28:32.820	11.09.2020	10:35:41	3DD.003D7A9E1B	989.001031446043
11.05.2020	17:28:32.950	11.09.2020	10:35:41	3DD.003D7A9E1B	989.001031446043
11.05.2020	17:28:33.070	11.09.2020	10:35:41	3DD.003D7A9E1B	989.001031446043
11.05.2020	17:28:33.170	11.09.2020	10:35:41	3DD.003D7A9E1B	989.001031446043
11.05.2020	17:28:33.300	11.09.2020	10:35:41	3DD.003D7A9E1B	989.001031446043
11.05.2020	17:28:33.420	11.09.2020	10:35:41	3DD.003D7A9E1B	989.001031446043
11.05.2020	17:28:33.580	11.09.2020	10:35:41	3DD.003D7A9E1B	989.001031446043
11.05.2020	17:28:33.640	11.09.2020	10:35:41	3DD.003D7A9E1B	989.001031446043
11.05.2020	17:28:33.800	11.09.2020	10:35:41	3DD.003D7A9E1B	989.001031446043
11.05.2020	17:28:33.920	11.09.2020	10:35:41	3DD.003D7A9E1B	989.001031446043
11.05.2020	17:28:34.060	11.09.2020	10:35:41	3DD.003D7A9E1B	989.001031446043
11.05.2020	17:28:34.180	11.09.2020	10:35:41	3DD.003D7A9E1B	989.001031446043
11.05.2020	17:28:34.310	11.09.2020	10:35:41	3DD.003D7A9E1B	989.001031446043
11.05.2020	17:28:34.410	11.09.2020	10:35:41	3DD.003D7A9E1B	989.001031446043
11.05.2020	17:28:34.500	11.09.2020	10:35:41	3DD.003D7A9E1B	989.001031446043
11.05.2020	17:28:34.670	11.09.2020	10:35:41	3DD.003D7A9E1B	989.001031446043
11.05.2020	17:28:34.790	11.09.2020	10:35:41	3DD.003D7A9E1B	989.001031446043
11.05.2020	17:28:34.920	11.09.2020	10:35:41	3DD.003D7A9E1B	989.001031446043
11.05.2020	17:28:35.040	11.09.2020	10:35:41	3DD.003D7A9E1B	989.001031446043
11.05.2020	17:28:35.210	11.09.2020	10:35:41	3DD.003D7A9E1B	989.001031446043
11.05.2020	17:28:35.340	11.09.2020	10:35:41	3DD.003D7A9E1B	989.001031446043
11.05.2020	17:28:35.440	11.09.2020	10:35:41	3DD.003D7A9E1B	989.001031446043
11.05.2020	17:28:35.570	11.09.2020	10:35:41	3DD.003D7A9E1B	989.001031446043
11.05.2020	17:28:35.630	11.09.2020	10:35:41	3DD.003D7A9E1B	989.001031446043
11.05.2020	17:28:35.770	11.09.2020	10:35:41	3DD.003D7A9E1B	989.001031446043
11.05.2020	17:28:35.900	11.09.2020	10:35:41	3DD.003D7A9E1B	989.001031446043
11.05.2020	17:28:36.050	11.09.2020	10:35:41	3DD.003D7A9E1B	989.001031446043
11.05.2020	17:28:36.180	11.09.2020	10:35:41	3DD.003D7A9E1B	989.001031446043
11.05.2020	17:28:36.310	11.09.2020	10:35:41	3DD.003D7A9E1B	989.001031446043
11.05.2020	17:28:36.440	11.09.2020	10:35:41	3DD.003D7A9E1B	989.001031446043
11.05.2020	17:28:36.550	11.09.2020	10:35:41	3DD.003D7A9E1B	989.001031446043
11.05.2020	17:28:36.720	11.09.2020	10:35:41	3DD.003D7A9E1B	989.001031446043
11.05.2020	17:28:36.790	11.09.2020	10:35:41	3DD.003D7A9E1B	989.001031446043
11.05.2020	17:28:36.820	11.09.2020	10:35:41	3DD.003D7A9E1B	989.001031446043
11.05.2020	17:28:36.920	11.09.2020	10:35:42	3DD.003D7A9E1B	989.001031446043
11.05.2020	17:28:37.050	11.09.2020	10:35:42	3DD.003D7A9E1B	989.001031446043
11.05.2020	17:28:37.180	11.09.2020	10:35:42	3DD.003D7A9E1B	989.001031446043
11.05.2020	17:28:37.340	11.09.2020	10:35:42	3DD.003D7A9E1B	989.001031446043
11.05.2020	17:28:37.500	11.09.2020	10:35:42	3DD.003D7A9E1B	989.001031446043
11.05.2020	17:28:37.620	11.09.2020	10:35:42	3DD.003D7A9E1B	989.001031446043
11.05.2020	17:28:37.720	11.09.2020	10:35:42	3DD.003D7A9E1B	989.001031446043
11.05.2020	17:28:37.830	11.09.2020	10:35:42	3DD.003D7A9E1B	989.001031446043
11.05.2020	17:28:37.970	11.09.2020	10:35:42	3DD.003D7A9E1B	989.001031446043
11.05.2020	17:28:38.100	11.09.2020	10:35:42	3DD.003D7A9E1B	989.001031446043
11.05.2020	17:28:38.190	11.09.2020	10:35:42	3DD.003D7A9E1B	989.001031446043
11.05.2020	17:28:38.290	11.09.2020	10:35:42	3DD.003D7A9E1B	989.001031446043
11.05.2020	17:28:38.420	11.09.2020	10:35:42	3DD.003D7A9E1B	989.001031446043
11.05.2020	17:28:38.540	11.09.2020	10:35:42	3DD.003D7A9E1B	989.001031446043
11.05.2020	17:28:38.700	11.09.2020	10:35:42	3DD.003D7A9E1B	989.001031446043
11.05.2020	17:28:38.790	11.09.2020	10:35:42	3DD.003D7A9E1B	989.001031446043
11.05.2020	17:28:38.920	11.09.2020	10:35:42	3DD.003D7A9E1B	989.001031446043
11.05.2020	17:28:39.020	11.09.2020	10:35:42	3DD.003D7A9E1B	989.001031446043
11.05.2020	17:28:39.120	11.09.2020	10:35:42	3DD.003D7A9E1B	989.001031446043
11.05.2020	17:28:39.240	11.09.2020	10:35:42	3DD.003D7A9E1B	989.001031446043
11.05.2020	17:28:39.430	11.09.2020	10:35:42	3DD.003D7A9E1B	989.001031446043
11.05.2020	17:28:39.540	11.09.2020	10:35:42	3DD.003D7A9E1B	989.001031446043
11.05.2020	17:28:39.690	11.09.2020	10:35:42	3DD.003D7A9E1B	989.001031446043
11.05.2020	17:28:40.160	11.09.2020	10:35:42	3DD.003D7A9E1B	989.001031446043
11.05.2020	17:28:40.290	11.09.2020	10:35:42	3DD.003D7A9E1B	989.001031446043
11.05.2020	17:28:40.380	11.09.2020	10:35:42	3DD.003D7A9E1B	989.001031446043
11.05.2020	17:28:40.520	11.09.2020	10:35:42	3DD.003D7A9E1B	989.001031446043
11.05.2020	17:28:40.620	11.09.2020	10:35:42	3DD.003D7A9E1B	989.001031446043
11.05.2020	17:28:41.040	11.09.2020	10:35:42	3DD.003D7A9E1B	989.001031446043
11.05.2020	17:28:41.180	11.09.2020	10:35:42	3DD.003D7A9E1B	989.001031446043
11.05.2020	17:28:41.470	11.09.2020	10:35:42	3DD.003D7A9E1B	989.001031446043
11.05.2020	17:28:41.530	11.09.2020	10:35:42	3DD.003D7A9E1B	989.001031446043
11.05.2020	17:28:41.980	11.09.2020	10:35:42	3DD.003D7A9E1B	989.001031446043
11.05.2020	17:28:42.080	11.09.2020	10:35:42	3DD.003D7A9E1B	989.001031446043
11.05.2020	17:28:42.390	11.09.2020	10:35:42	3DD.003D7A9E1B	989.001031446043
11.05.2020	17:28:42.810	11.09.2020	10:35:42	3DD.003D7A9E1B	989.001031446043
11.05.2020	17:28:42.960	11.09.2020	10:35:42	3DD.003D7A9E1B	989.001031446043
11.05.2020	17:28:43.080	11.09.2020	10:35:42	3DD.003D7A9E1B	989.001031446043
11.05.2020	17:28:43.180	11.09.2020	10:35:42	3DD.003D7A9E1B	989.001031446043
11.05.2020	17:28:43.350	11.09.2020	10:35:42	3DD.003D7A9E1B	989.001031446043
11.05.2020	17:28:43.470	11.09.2020	10:35:42	3DD.003D7A9E1B	989.001031446043
11.05.2020	17:28:43.600	11.09.2020	10:35:42	3DD.003D7A9E1B	989.001031446043
11.05.2020	17:28:43.690	11.09.2020	10:35:42	3DD.003D7A9E1B	989.001031446043
11.05.2020	17:28:43.800	11.09.2020	10:35:42	3DD.003D7A9E1B	989.001031446043
11.05.2020	17:28:43.920	11.09.2020	10:35:42	3DD.003D7A9E1B	989.001031446043
11.05.2020	17:28:44.010	11.09.2020	10:35:42	3DD.003D7A9E1B	989.001031446043
11.05.2020	17:28:44.140	11.09.2020	10:35:42	3DD.003D7A9E1B	989.001031446043
11.05.2020	17:28:44.200	11.09.2020	10:35:42	3DD.003D7A9E1B	989.001031446043
11.05.2020	17:28:44.360	11.09.2020	10:35:42	3DD.003D7A9E1B	989.001031446043
11.05.2020	17:28:44.450	11.09.2020	10:35:42	3DD.003D7A9E1B	989.001031446043
11.05.2020	17:28:44.550	11.09.2020	10:35:42	3DD.003D7A9E1B	989.001031446043
11.05.2020	17:28:44.680	11.09.2020	10:35:42	3DD.003D7A9E1B	989.001031446043
11.05.2020	17:28:44.800	11.09.2020	10:35:42	3DD.003D7A9E1B	989.001031446043
11.05.2020	17:28:44.900	11.09.2020	10:35:42	3DD.003D7A9E1B	989.001031446043
11.05.2020	17:28:45.000	11.09.2020	10:35:42	3DD.003D7A9E1B	989.001031446043
11.05.2020	17:28:45.100	11.09.2020	10:35:42	3DD.003D7A9E1B	989.001031446043
11.05.2020	17:28:45.290	11.09.2020	10:35:42	3DD.003D7A9E1B	989.001031446043
11.05.2020	17:28:45.650	11.09.2020	10:35:42	3DD.003D7A9E1B	989.001031446043
11.05.2020	17:28:45.790	11.09.2020	10:35:42	3DD.003D7A9E1B	989.001031446043
11.05.2020	17:28:45.890	11.09.2020	10:35:42	3DD.003D7A9E1B	989.001031446043
11.05.2020	17:28:46.040	11.09.2020	10:35:42	3DD.003D7A9E1B	989.001031446043
11.05.2020	17:28:46.200	11.09.2020	10:35:42	3DD.003D7A9E1B	989.001031446043
11.05.2020	17:28:46.310	11.09.2020	10:35:42	3DD.003D7A9E1B	989.001031446043
11.05.2020	17:28:46.470	11.09.2020	10:35:42	3DD.003D7A9E1B	989.001031446043
11.05.2020	17:28:46.590	11.09.2020	10:35:42	3DD.003D7A9E1B	989.001031446043
11.05.2020	17:28:46.690	11.09.2020	10:35:42	3DD.003D7A9E1B	989.001031446043
11.05.2020	17:28:46.830	11.09.2020	10:35:43	3DD.003D7A9E1B	989.001031446043
11.05.2020	17:28:46.930	11.09.2020	10:35:43	3DD.003D7A9E1B	989.001031446043
11.05.2020	17:28:47.070	11.09.2020	10:35:43	3DD.003D7A9E1B	989.001031446043
11.05.2020	17:28:47.190	11.09.2020	10:35:43	3DD.003D7A9E1B	989.001031446043
11.05.2020	17:28:47.360	11.09.2020	10:35:43	3DD.003D7A9E1B	989.001031446043
11.05.2020	17:28:47.470	11.09.2020	10:35:43	3DD.003D7A9E1B	989.001031446043
11.05.2020	17:28:47.620	11.09.2020	10:35:43	3DD.003D7A9E1B	989.001031446043
11.05.2020	17:28:47.690	11.09.2020	10:35:43	3DD.003D7A9E1B	989.001031446043
11.05.2020	17:28:47.720	11.09.2020	10:35:43	3DD.003D7A9E1B	989.001031446043
11.05.2020	17:28:47.780	11.09.2020	10:35:43	3DD.003D7A9E1B	989.001031446043
11.05.2020	17:28:47.910	11.09.2020	10:35:43	3DD.003D7A9E1B	989.001031446043
11.05.2020	17:28:48.230	11.09.2020	10:35:43	3DD.003D7A9E1B	989.001031446043
11.05.2020	17:28:48.320	11.09.2020	10:35:43	3DD.003D7A9E1B	989.001031446043
11.05.2020	17:28:48.440	11.09.2020	10:35:43	3DD.003D7A9E1B	989.001031446043
11.05.2020	17:28:48.640	11.09.2020	10:35:43	3DD.003D7A9E1B	989.001031446043
11.05.2020	17:28:48.700	11.09.2020	10:35:43	3DD.003D7A9E1B	989.001031446043
11.05.2020	17:40:54.840	11.09.2020	10:35:43	3DD.003D7A9E1B	989.001031446043
11.05.2020	17:40:54.990	11.09.2020	10:35:43	3DD.003D7A9E1B	989.001031446043
11.05.2020	17:40:55.060	11.09.2020	10:35:43	3DD.003D7A9E1B	989.001031446043
11.05.2020	17:40:55.240	11.09.2020	10:35:43	3DD.003D7A9E1B	989.001031446043
11.05.2020	17:40:55.310	11.09.2020	10:35:43	3DD.003D7A9E1B	989.001031446043
11.05.2020	17:40:55.440	11.09.2020	10:35:43	3DD.003D7A9E1B	989.001031446043
11.05.2020	17:40:55.520	11.09.2020	10:35:43	3DD.003D7A9E1B	989.001031446043
11.05.2020	17:40:55.620	11.09.2020	10:35:43	3DD.003D7A9E1B	989.001031446043
11.05.2020	17:40:55.760	11.09.2020	10:35:43	3DD.003D7A9E1B	989.001031446043
11.05.2020	17:40:55.910	11.09.2020	10:35:43	3DD.003D7A9E1B	989.001031446043
11.05.2020	17:40:56.030	11.09.2020	10:35:43	3DD.003D7A9E1B	989.001031446043
11.05.2020	17:40:56.100	11.09.2020	10:35:43	3DD.003D7A9E1B	989.001031446043
11.05.2020	17:40:56.220	11.09.2020	10:35:43	3DD.003D7A9E1B	989.001031446043
11.05.2020	17:40:56.370	11.09.2020	10:35:43	3DD.003D7A9E1B	989.001031446043
11.05.2020	17:40:56.440	11.09.2020	10:35:43	3DD.003D7A9E1B	989.001031446043
11.05.2020	17:40:56.910	11.09.2020	10:35:43	3DD.003D7A9E1B	989.001031446043
11.06.2020	03:08:05.560	11.09.2020	10:35:43	3DD.003D7A9E1B	989.001031446043
11.06.2020	03:08:05.600	11.09.2020	10:35:43	3DD.003D7A9E1B	989.001031446043
11.06.2020	03:08:05.650	11.09.2020	10:35:43	3DD.003D7A9E1B	989.001031446043
11.06.2020	03:08:05.700	11.09.2020	10:35:43	3DD.003D7A9E1B	989.001031446043
11.06.2020	03:08:05.870	11.09.2020	10:35:43	3DD.003D7A9E1B	989.001031446043
11.06.2020	03:08:05.970	11.09.2020	10:35:43	3DD.003D7A9E1B	989.001031446043
11.06.2020	03:08:06.110	11.09.2020	10:35:43	3DD.003D7A9E1B	989.001031446043
11.06.2020	03:08:06.210	11.09.2020	10:35:43	3DD.003D7A9E1B	989.001031446043
11.06.2020	03:08:06.310	11.09.2020	10:35:43	3DD.003D7A9E1B	989.001031446043
11.06.2020	03:08:06.410	11.09.2020	10:35:43	3DD.003D7A9E1B	989.001031446043
11.06.2020	03:08:06.510	11.09.2020	10:35:43	3DD.003D7A9E1B	989.001031446043
11.06.2020	03:08:06.610	11.09.2020	10:35:44	3DD.003D7A9E1B	989.001031446043
11.06.2020	03:08:06.700	11.09.2020	10:35:44	3DD.003D7A9E1B	989.001031446043
11.06.2020	03:08:06.800	11.09.2020	10:35:44	3DD.003D7A9E1B	989.001031446043
11.06.2020	03:08:06.900	11.09.2020	10:35:44	3DD.003D7A9E1B	989.001031446043
11.06.2020	03:08:07.000	11.09.2020	10:35:44	3DD.003D7A9E1B	989.001031446043
11.06.2020	03:08:07.110	11.09.2020	10:35:44	3DD.003D7A9E1B	989.001031446043
11.06.2020	03:08:07.200	11.09.2020	10:35:44	3DD.003D7A9E1B	989.001031446043
11.06.2020	03:08:07.330	11.09.2020	10:35:44	3DD.003D7A9E1B	989.001031446043
11.06.2020	03:08:07.430	11.09.2020	10:35:44	3DD.003D7A9E1B	989.001031446043
11.06.2020	03:08:07.530	11.09.2020	10:35:44	3DD.003D7A9E1B	989.001031446043
11.06.2020	03:08:07.630	11.09.2020	10:35:44	3DD.003D7A9E1B	989.001031446043
11.06.2020	03:08:07.770	11.09.2020	10:35:44	3DD.003D7A9E1B	989.001031446043
11.06.2020	03:08:07.880	11.09.2020	10:35:44	3DD.003D7A9E1B	989.001031446043
11.06.2020	03:08:08.150	11.09.2020	10:35:44	3DD.003D7A9E1B	989.001031446043
11.06.2020	03:08:08.250	11.09.2020	10:35:44	3DD.003D7A9E1B	989.001031446043
11.06.2020	03:08:08.370	11.09.2020	10:35:44	3DD.003D7A9E1B	989.001031446043
11.06.2020	03:08:08.800	11.09.2020	10:35:44	3DD.003D7A9E1B	989.001031446043
11.06.2020	03:08:08.900	11.09.2020	10:35:44	3DD.003D7A9E1B	989.001031446043
11.06.2020	03:08:09.030	11.09.2020	10:35:44	3DD.003D7A9E1B	989.001031446043
11.06.2020	03:08:09.120	11.09.2020	10:35:44	3DD.003D7A9E1B	989.001031446043
11.06.2020	03:08:09.220	11.09.2020	10:35:44	3DD.003D7A9E1B	989.001031446043
11.06.2020	03:08:09.350	11.09.2020	10:35:44	3DD.003D7A9E1B	989.001031446043
11.06.2020	03:08:09.450	11.09.2020	10:35:44	3DD.003D7A9E1B	989.001031446043
11.06.2020	03:08:09.550	11.09.2020	10:35:44	3DD.003D7A9E1B	989.001031446043
11.06.2020	03:08:09.650	11.09.2020	10:35:44	3DD.003D7A9E1B	989.001031446043
11.06.2020	03:08:09.750	11.09.2020	10:35:44	3DD.003D7A9E1B	989.001031446043
11.06.2020	03:08:09.860	11.09.2020	10:35:44	3DD.003D7A9E1B	989.001031446043
11.06.2020	03:08:09.950	11.09.2020	10:35:44	3DD.003D7A9E1B	989.001031446043
11.06.2020	03:08:10.050	11.09.2020	10:35:44	3DD.003D7A9E1B	989.001031446043
11.06.2020	03:08:10.150	11.09.2020	10:35:44	3DD.003D7A9E1B	989.001031446043
11.06.2020	03:08:10.250	11.09.2020	10:35:44	3DD.003D7A9E1B	989.001031446043
11.06.2020	03:08:10.350	11.09.2020	10:35:44	3DD.003D7A9E1B	989.001031446043
11.06.2020	03:08:10.460	11.09.2020	10:35:44	3DD.003D7A9E1B	989.001031446043
11.06.2020	03:08:10.550	11.09.2020	10:35:44	3DD.003D7A9E1B	989.001031446043
11.06.2020	03:08:10.650	11.09.2020	10:35:44	3DD.003D7A9E1B	989.001031446043
11.06.2020	03:08:10.820	11.09.2020	10:35:44	3DD.003D7A9E1B	989.001031446043
11.06.2020	03:08:10.910	11.09.2020	10:35:44	3DD.003D7A9E1B	989.001031446043
11.06.2020	03:08:10.970	11.09.2020	10:35:44	3DD.003D7A9E1B	989.001031446043
11.06.2020	03:08:10.980	11.09.2020	10:35:44	3DD.003D7A9E1B	989.001031446043
11.06.2020	03:08:11.060	11.09.2020	10:35:44	3DD.003D7A9E1B	989.001031446043
11.06.2020	03:08:11.240	11.09.2020	10:35:44	3DD.003D7A9E1B	989.001031446043
11.06.2020	03:08:11.590	11.09.2020	10:35:44	3DD.003D7A9E1B	989.001031446043
11.06.2020	03:08:11.710	11.09.2020	10:35:44	3DD.003D7A9E1B	989.001031446043
11.06.2020	03:08:11.810	11.09.2020	10:35:44	3DD.003D7A9E1B	989.001031446043
11.06.2020	03:08:11.910	11.09.2020	10:35:44	3DD.003D7A9E1B	989.001031446043
11.06.2020	03:08:12.270	11.09.2020	10:35:44	3DD.003D7A9E1B	989.001031446043
11.06.2020	03:08:12.530	11.09.2020	10:35:44	3DD.003D7A9E1B	989.001031446043
11.06.2020	03:08:12.670	11.09.2020	10:35:44	3DD.003D7A9E1B	989.001031446043
11.06.2020	03:08:12.770	11.09.2020	10:35:44	3DD.003D7A9E1B	989.001031446043
11.06.2020	03:08:12.860	11.09.2020	10:35:44	3DD.003D7A9E1B	989.001031446043
11.06.2020	03:08:12.980	11.09.2020	10:35:44	3DD.003D7A9E1B	989.001031446043
11.06.2020	03:08:13.110	11.09.2020	10:35:44	3DD.003D7A9E1B	989.001031446043
11.06.2020	03:08:13.410	11.09.2020	10:35:44	3DD.003D7A9E1B	989.001031446043
11.06.2020	03:08:13.500	11.09.2020	10:35:44	3DD.003D7A9E1B	989.001031446043
11.06.2020	03:08:13.630	11.09.2020	10:35:44	3DD.003D7A9E1B	989.001031446043
11.06.2020	03:08:13.800	11.09.2020	10:35:44	3DD.003D7A9E1B	989.001031446043
11.06.2020	03:08:13.920	11.09.2020	10:35:44	3DD.003D7A9E1B	989.001031446043
11.06.2020	03:08:14.020	11.09.2020	10:35:44	3DD.003D7A9E1B	989.001031446043
11.06.2020	03:08:14.120	11.09.2020	10:35:44	3DD.003D7A9E1B	989.001031446043
11.06.2020	03:08:14.240	11.09.2020	10:35:44	3DD.003D7A9E1B	989.001031446043
11.06.2020	03:08:14.380	11.09.2020	10:35:44	3DD.003D7A9E1B	989.001031446043
11.06.2020	03:08:14.450	11.09.2020	10:35:44	3DD.003D7A9E1B	989.001031446043
11.06.2020	17:37:18.360	11.09.2020	10:35:45	3DD.003D7A9E1B	989.001031446043
11.06.2020	17:37:18.490	11.09.2020	10:35:45	3DD.003D7A9E1B	989.001031446043
11.06.2020	17:37:18.590	11.09.2020	10:35:45	3DD.003D7A9E1B	989.001031446043
11.06.2020	17:37:18.650	11.09.2020	10:35:45	3DD.003D7A9E1B	989.001031446043
11.06.2020	17:37:18.790	11.09.2020	10:35:45	3DD.003D7A9E1B	989.001031446043
11.06.2020	17:37:18.910	11.09.2020	10:35:45	3DD.003D7A9E1B	989.001031446043
11.06.2020	17:37:19.020	11.09.2020	10:35:45	3DD.003D7A9E1B	989.001031446043
11.06.2020	17:37:19.120	11.09.2020	10:35:45	3DD.003D7A9E1B	989.001031446043
11.06.2020	17:37:19.220	11.09.2020	10:35:45	3DD.003D7A9E1B	989.001031446043
11.06.2020	17:37:19.320	11.09.2020	10:35:45	3DD.003D7A9E1B	989.001031446043
11.06.2020	17:37:19.410	11.09.2020	10:35:45	3DD.003D7A9E1B	989.001031446043
11.06.2020	17:37:19.520	11.09.2020	10:35:45	3DD.003D7A9E1B	989.001031446043
11.06.2020	17:37:19.620	11.09.2020	10:35:45	3DD.003D7A9E1B	989.001031446043
11.06.2020	17:37:19.710	11.09.2020	10:35:45	3DD.003D7A9E1B	989.001031446043
11.06.2020	17:37:19.820	11.09.2020	10:35:45	3DD.003D7A9E1B	989.001031446043
11.06.2020	17:37:19.920	11.09.2020	10:35:45	3DD.003D7A9E1B	989.001031446043
11.06.2020	17:37:20.020	11.09.2020	10:35:45	3DD.003D7A9E1B	989.001031446043
11.06.2020	17:37:20.110	11.09.2020	10:35:45	3DD.003D7A9E1B	989.001031446043
11.06.2020	17:37:20.220	11.09.2020	10:35:45	3DD.003D7A9E1B	989.001031446043
11.06.2020	17:37:20.310	11.09.2020	10:35:45	3DD.003D7A9E1B	989.001031446043
11.06.2020	17:37:20.410	11.09.2020	10:35:45	3DD.003D7A9E1B	989.001031446043
11.06.2020	17:37:20.510	11.09.2020	10:35:45	3DD.003D7A9E1B	989.001031446043
11.06.2020	17:37:20.620	11.09.2020	10:35:45	3DD.003D7A9E1B	989.001031446043
11.06.2020	17:37:20.710	11.09.2020	10:35:45	3DD.003D7A9E1B	989.001031446043
11.06.2020	17:37:20.820	11.09.2020	10:35:45	3DD.003D7A9E1B	989.001031446043
11.06.2020	17:37:20.920	11.09.2020	10:35:45	3DD.003D7A9E1B	989.001031446043
11.06.2020	17:37:21.050	11.09.2020	10:35:45	3DD.003D7A9E1B	989.001031446043
11.06.2020	17:37:21.110	11.09.2020	10:35:45	3DD.003D7A9E1B	989.001031446043
11.06.2020	17:37:21.270	11.09.2020	10:35:45	3DD.003D7A9E1B	989.001031446043
11.06.2020	17:37:21.390	11.09.2020	10:35:45	3DD.003D7A9E1B	989.001031446043
11.06.2020	17:37:21.490	11.09.2020	10:35:45	3DD.003D7A9E1B	989.001031446043
11.06.2020	17:37:21.620	11.09.2020	10:35:45	3DD.003D7A9E1B	989.001031446043
11.06.2020	17:37:21.740	11.09.2020	10:35:45	3DD.003D7A9E1B	989.001031446043
11.06.2020	17:37:21.850	11.09.2020	10:35:45	3DD.003D7A9E1B	989.001031446043
11.06.2020	17:37:21.920	11.09.2020	10:35:45	3DD.003D7A9E1B	989.001031446043
11.06.2020	17:37:21.960	11.09.2020	10:35:45	3DD.003D7A9E1B	989.001031446043
11.06.2020	17:37:22.080	11.09.2020	10:35:45	3DD.003D7A9E1B	989.001031446043
11.06.2020	17:37:22.180	11.09.2020	10:35:45	3DD.003D7A9E1B	989.001031446043
11.06.2020	17:37:22.310	11.09.2020	10:35:45	3DD.003D7A9E1B	989.001031446043
11.06.2020	17:37:22.450	11.09.2020	10:35:45	3DD.003D7A9E1B	989.001031446043
11.06.2020	17:37:22.540	11.09.2020	10:35:45	3DD.003D7A9E1B	989.001031446043
11.06.2020	17:37:22.640	11.09.2020	10:35:45	3DD.003D7A9E1B	989.001031446043
11.06.2020	17:37:22.750	11.09.2020	10:35:45	3DD.003D7A9E1B	989.001031446043
11.06.2020	17:37:22.850	11.09.2020	10:35:46	3DD.003D7A9E1B	989.001031446043
11.06.2020	17:37:22.950	11.09.2020	10:35:46	3DD.003D7A9E1B	989.001031446043
11.06.2020	17:37:23.040	11.09.2020	10:35:46	3DD.003D7A9E1B	989.001031446043
11.06.2020	17:37:23.170	11.09.2020	10:35:46	3DD.003D7A9E1B	989.001031446043
11.06.2020	17:37:23.260	11.09.2020	10:35:46	3DD.003D7A9E1B	989.001031446043
11.06.2020	17:37:23.390	11.09.2020	10:35:46	3DD.003D7A9E1B	989.001031446043
11.06.2020	17:37:23.450	11.09.2020	10:35:46	3DD.003D7A9E1B	989.001031446043
11.06.2020	17:37:23.620	11.09.2020	10:35:46	3DD.003D7A9E1B	989.001031446043
11.06.2020	17:37:23.690	11.09.2020	10:35:46	3DD.003D7A9E1B	989.001031446043
11.06.2020	17:37:23.870	11.09.2020	10:35:46	3DD.003D7A9E1B	989.001031446043
11.06.2020	17:37:23.980	11.09.2020	10:35:46	3DD.003D7A9E1B	989.001031446043
11.06.2020	17:37:24.080	11.09.2020	10:35:46	3DD.003D7A9E1B	989.001031446043
11.06.2020	17:37:24.220	11.09.2020	10:35:46	3DD.003D7A9E1B	989.001031446043
11.06.2020	17:37:24.330	11.09.2020	10:35:46	3DD.003D7A9E1B	989.001031446043
11.06.2020	17:56:09.220	11.09.2020	10:35:46	3DD.003D7A9E1B	989.001031446043
11.06.2020	17:56:09.290	11.09.2020	10:35:46	3DD.003D7A9E1B	989.001031446043
11.06.2020	17:56:09.600	11.09.2020	10:35:46	3DD.003D7A9E1B	989.001031446043
11.06.2020	17:56:09.820	11.09.2020	10:35:46	3DD.003D7A9E1B	989.001031446043
11.06.2020	17:56:09.910	11.09.2020	10:35:46	3DD.003D7A9E1B	989.001031446043
11.06.2020	17:56:10.100	11.09.2020	10:35:46	3DD.003D7A9E1B	989.001031446043
11.06.2020	17:56:10.200	11.09.2020	10:35:46	3DD.003D7A9E1B	989.001031446043
11.06.2020	17:56:10.300	11.09.2020	10:35:46	3DD.003D7A9E1B	989.001031446043
11.06.2020	17:56:10.430	11.09.2020	10:35:46	3DD.003D7A9E1B	989.001031446043
11.06.2020	17:56:10.500	11.09.2020	10:35:46	3DD.003D7A9E1B	989.001031446043
11.06.2020	17:56:10.620	11.09.2020	10:35:46	3DD.003D7A9E1B	989.001031446043
11.06.2020	17:56:10.720	11.09.2020	10:35:46	3DD.003D7A9E1B	989.001031446043
11.06.2020	17:56:10.830	11.09.2020	10:35:46	3DD.003D7A9E1B	989.001031446043
11.06.2020	17:56:10.920	11.09.2020	10:35:46	3DD.003D7A9E1B	989.001031446043
11.06.2020	17:56:11.020	11.09.2020	10:35:46	3DD.003D7A9E1B	989.001031446043
11.06.2020	17:56:11.120	11.09.2020	10:35:46	3DD.003D7A9E1B	989.001031446043
11.06.2020	17:56:11.250	11.09.2020	10:35:46	3DD.003D7A9E1B	989.001031446043
11.06.2020	17:56:11.350	11.09.2020	10:35:46	3DD.003D7A9E1B	989.001031446043
11.06.2020	17:56:11.450	11.09.2020	10:35:46	3DD.003D7A9E1B	989.001031446043
11.06.2020	17:56:11.550	11.09.2020	10:35:46	3DD.003D7A9E1B	989.001031446043
11.06.2020	17:56:11.650	11.09.2020	10:35:46	3DD.003D7A9E1B	989.001031446043
11.06.2020	17:56:11.800	11.09.2020	10:35:46	3DD.003D7A9E1B	989.001031446043
11.06.2020	17:56:11.900	11.09.2020	10:35:46	3DD.003D7A9E1B	989.001031446043
11.06.2020	17:56:12.000	11.09.2020	10:35:46	3DD.003D7A9E1B	989.001031446043
11.06.2020	17:56:12.100	11.09.2020	10:35:46	3DD.003D7A9E1B	989.001031446043
11.06.2020	17:56:12.200	11.09.2020	10:35:46	3DD.003D7A9E1B	989.001031446043
11.06.2020	17:56:12.300	11.09.2020	10:35:46	3DD.003D7A9E1B	989.001031446043
11.06.2020	17:56:12.400	11.09.2020	10:35:46	3DD.003D7A9E1B	989.001031446043
11.06.2020	17:56:12.500	11.09.2020	10:35:46	3DD.003D7A9E1B	989.001031446043
11.06.2020	17:56:12.600	11.09.2020	10:35:46	3DD.003D7A9E1B	989.001031446043
11.06.2020	17:56:12.730	11.09.2020	10:35:46	3DD.003D7A9E1B	989.001031446043
11.06.2020	17:56:12.830	11.09.2020	10:35:46	3DD.003D7A9E1B	989.001031446043
11.06.2020	17:56:12.930	11.09.2020	10:35:46	3DD.003D7A9E1B	989.001031446043
11.06.2020	17:56:13.030	11.09.2020	10:35:46	3DD.003D7A9E1B	989.001031446043
11.06.2020	17:56:13.130	11.09.2020	10:35:46	3DD.003D7A9E1B	989.001031446043
11.06.2020	17:56:13.270	11.09.2020	10:35:46	3DD.003D7A9E1B	989.001031446043
11.06.2020	17:56:13.370	11.09.2020	10:35:46	3DD.003D7A9E1B	989.001031446043
11.06.2020	17:56:13.470	11.09.2020	10:35:46	3DD.003D7A9E1B	989.001031446043
11.06.2020	17:56:13.630	11.09.2020	10:35:46	3DD.003D7A9E1B	989.001031446043
11.06.2020	17:56:13.730	11.09.2020	10:35:46	3DD.003D7A9E1B	989.001031446043
11.06.2020	17:56:13.830	11.09.2020	10:35:46	3DD.003D7A9E1B	989.001031446043
11.06.2020	17:56:13.930	11.09.2020	10:35:46	3DD.003D7A9E1B	989.001031446043
11.06.2020	17:56:14.070	11.09.2020	10:35:46	3DD.003D7A9E1B	989.001031446043
11.06.2020	17:56:14.140	11.09.2020	10:35:46	3DD.003D7A9E1B	989.001031446043
11.06.2020	17:56:15.170	11.09.2020	10:35:46	3DD.003D7A9E1B	989.001031446043
11.06.2020	17:56:15.300	11.09.2020	10:35:46	3DD.003D7A9E1B	989.001031446043
11.06.2020	17:56:15.730	11.09.2020	10:35:46	3DD.003D7A9E1B	989.001031446043
11.06.2020	17:56:15.890	11.09.2020	10:35:46	3DD.003D7A9E1B	989.001031446043
11.06.2020	17:56:15.990	11.09.2020	10:35:46	3DD.003D7A9E1B	989.001031446043
11.06.2020	17:56:16.770	11.09.2020	10:35:46	3DD.003D7A9E1B	989.001031446043
11.06.2020	17:56:16.860	11.09.2020	10:35:46	3DD.003D7A9E1B	989.001031446043
11.06.2020	17:56:16.970	11.09.2020	10:35:47	3DD.003D7A9E1B	989.001031446043
11.06.2020	17:56:17.160	11.09.2020	10:35:47	3DD.003D7A9E1B	989.001031446043
11.06.2020	17:56:17.280	11.09.2020	10:35:47	3DD.003D7A9E1B	989.001031446043
11.06.2020	17:56:17.440	11.09.2020	10:35:47	3DD.003D7A9E1B	989.001031446043
11.06.2020	17:56:17.620	11.09.2020	10:35:47	3DD.003D7A9E1B	989.001031446043
11.06.2020	17:56:17.730	11.09.2020	10:35:47	3DD.003D7A9E1B	989.001031446043
11.06.2020	17:56:17.860	11.09.2020	10:35:47	3DD.003D7A9E1B	989.001031446043
11.06.2020	17:56:18.010	11.09.2020	10:35:47	3DD.003D7A9E1B	989.001031446043
11.06.2020	17:56:18.130	11.09.2020	10:35:47	3DD.003D7A9E1B	989.001031446043
11.06.2020	17:56:18.260	11.09.2020	10:35:47	3DD.003D7A9E1B	989.001031446043
11.06.2020	17:56:18.360	11.09.2020	10:35:47	3DD.003D7A9E1B	989.001031446043
11.06.2020	17:56:18.390	11.09.2020	10:35:47	3DD.003D7A9E1B	989.001031446043
11.06.2020	17:56:18.450	11.09.2020	10:35:47	3DD.003D7A9E1B	989.001031446043
11.06.2020	17:56:18.490	11.09.2020	10:35:47	3DD.003D7A9E1B	989.001031446043
11.06.2020	17:56:18.620	11.09.2020	10:35:47	3DD.003D7A9E1B	989.001031446043
11.06.2020	17:56:18.720	11.09.2020	10:35:47	3DD.003D7A9E1B	989.001031446043
11.06.2020	17:56:18.820	11.09.2020	10:35:47	3DD.003D7A9E1B	989.001031446043
11.06.2020	17:56:18.970	11.09.2020	10:35:47	3DD.003D7A9E1B	989.001031446043
11.06.2020	17:56:19.040	11.09.2020	10:35:47	3DD.003D7A9E1B	989.001031446043
11.06.2020	17:56:19.180	11.09.2020	10:35:47	3DD.003D7A9E1B	989.001031446043
11.06.2020	17:57:08.200	11.09.2020	10:35:47	3DD.003D7A9E1B	989.001031446043
11.06.2020	17:57:08.350	11.09.2020	10:35:47	3DD.003D7A9E1B	989.001031446043
11.06.2020	17:57:08.690	11.09.2020	10:35:47	3DD.003D7A9E1B	989.001031446043
11.06.2020	17:57:08.750	11.09.2020	10:35:47	3DD.003D7A9E1B	989.001031446043
11.06.2020	17:57:09.110	11.09.2020	10:35:47	3DD.003D7A9E1B	989.001031446043
11.06.2020	17:57:09.220	11.09.2020	10:35:47	3DD.003D7A9E1B	989.001031446043
11.06.2020	17:57:09.500	11.09.2020	10:35:47	3DD.003D7A9E1B	989.001031446043
11.06.2020	17:57:09.590	11.09.2020	10:35:47	3DD.003D7A9E1B	989.001031446043
11.06.2020	17:57:09.700	11.09.2020	10:35:47	3DD.003D7A9E1B	989.001031446043
11.06.2020	17:57:09.790	11.09.2020	10:35:47	3DD.003D7A9E1B	989.001031446043
11.06.2020	17:57:09.890	11.09.2020	10:35:47	3DD.003D7A9E1B	989.001031446043
11.06.2020	17:57:10.060	11.09.2020	10:35:47	3DD.003D7A9E1B	989.001031446043
11.06.2020	17:57:10.210	11.09.2020	10:35:47	3DD.003D7A9E1B	989.001031446043
11.06.2020	17:57:10.350	11.09.2020	10:35:47	3DD.003D7A9E1B	989.001031446043
11.06.2020	17:57:10.430	11.09.2020	10:35:47	3DD.003D7A9E1B	989.001031446043
11.06.2020	17:57:10.610	11.09.2020	10:35:47	3DD.003D7A9E1B	989.001031446043
11.06.2020	17:57:10.680	11.09.2020	10:35:47	3DD.003D7A9E1B	989.001031446043
11.06.2020	17:57:10.710	11.09.2020	10:35:47	3DD.003D7A9E1B	989.001031446043
11.06.2020	17:57:10.860	11.09.2020	10:35:47	3DD.003D7A9E1B	989.001031446043
11.06.2020	17:57:10.920	11.09.2020	10:35:47	3DD.003D7A9E1B	989.001031446043
11.06.2020	17:57:11.110	11.09.2020	10:35:47	3DD.003D7A9E1B	989.001031446043
11.06.2020	17:57:11.420	11.09.2020	10:35:47	3DD.003D7A9E1B	989.001031446043
11.06.2020	17:57:11.500	11.09.2020	10:35:47	3DD.003D7A9E1B	989.001031446043
11.06.2020	20:08:42.190	11.09.2020	10:35:47	3DD.003D7A9E1B	989.001031446043
11.06.2020	20:08:42.540	11.09.2020	10:35:47	3DD.003D7A9E1B	989.001031446043
11.06.2020	20:08:42.790	11.09.2020	10:35:47	3DD.003D7A9E1B	989.001031446043
11.06.2020	20:08:42.920	11.09.2020	10:35:47	3DD.003D7A9E1B	989.001031446043
11.06.2020	20:08:43.230	11.09.2020	10:35:47	3DD.003D7A9E1B	989.001031446043
11.06.2020	20:08:43.360	11.09.2020	10:35:47	3DD.003D7A9E1B	989.001031446043
11.06.2020	20:08:43.630	11.09.2020	10:35:47	3DD.003D7A9E1B	989.001031446043
11.06.2020	20:08:43.730	11.09.2020	10:35:47	3DD.003D7A9E1B	989.001031446043
11.06.2020	20:08:43.830	11.09.2020	10:35:47	3DD.003D7A9E1B	989.001031446043
11.06.2020	20:08:43.970	11.09.2020	10:35:47	3DD.003D7A9E1B	989.001031446043
11.06.2020	20:08:44.120	11.09.2020	10:35:47	3DD.003D7A9E1B	989.001031446043
11.06.2020	20:08:44.220	11.09.2020	10:35:47	3DD.003D7A9E1B	989.001031446043
11.06.2020	20:08:44.320	11.09.2020	10:35:47	3DD.003D7A9E1B	989.001031446043
11.06.2020	20:08:44.420	11.09.2020	10:35:47	3DD.003D7A9E1B	989.001031446043
11.06.2020	20:08:44.560	11.09.2020	10:35:47	3DD.003D7A9E1B	989.001031446043
11.06.2020	20:08:44.660	11.09.2020	10:35:47	3DD.003D7A9E1B	989.001031446043
11.06.2020	20:08:44.760	11.09.2020	10:35:47	3DD.003D7A9E1B	989.001031446043
11.06.2020	20:08:44.860	11.09.2020	10:35:47	3DD.003D7A9E1B	989.001031446043
11.06.2020	20:08:44.960	11.09.2020	10:35:48	3DD.003D7A9E1B	989.001031446043
11.06.2020	20:08:45.060	11.09.2020	10:35:48	3DD.003D7A9E1B	989.001031446043
11.06.2020	20:08:45.160	11.09.2020	10:35:48	3DD.003D7A9E1B	989.001031446043
11.06.2020	20:08:45.260	11.09.2020	10:35:48	3DD.003D7A9E1B	989.001031446043
11.06.2020	20:08:45.360	11.09.2020	10:35:48	3DD.003D7A9E1B	989.001031446043
11.06.2020	20:08:45.460	11.09.2020	10:35:48	3DD.003D7A9E1B	989.001031446043
11.06.2020	20:08:45.560	11.09.2020	10:35:48	3DD.003D7A9E1B	989.001031446043
11.06.2020	20:08:45.660	11.09.2020	10:35:48	3DD.003D7A9E1B	989.001031446043
11.06.2020	20:08:45.760	11.09.2020	10:35:48	3DD.003D7A9E1B	989.001031446043
11.06.2020	20:08:45.860	11.09.2020	10:35:48	3DD.003D7A9E1B	989.001031446043
11.06.2020	20:08:45.960	11.09.2020	10:35:48	3DD.003D7A9E1B	989.001031446043
11.06.2020	20:08:46.090	11.09.2020	10:35:48	3DD.003D7A9E1B	989.001031446043
11.06.2020	20:08:46.180	11.09.2020	10:35:48	3DD.003D7A9E1B	989.001031446043
11.06.2020	20:08:46.280	11.09.2020	10:35:48	3DD.003D7A9E1B	989.001031446043
11.06.2020	20:08:46.380	11.09.2020	10:35:48	3DD.003D7A9E1B	989.001031446043
11.06.2020	20:08:46.480	11.09.2020	10:35:48	3DD.003D7A9E1B	989.001031446043
11.06.2020	20:08:46.580	11.09.2020	10:35:48	3DD.003D7A9E1B	989.001031446043
11.06.2020	20:08:46.680	11.09.2020	10:35:48	3DD.003D7A9E1B	989.001031446043
11.06.2020	20:08:46.790	11.09.2020	10:35:48	3DD.003D7A9E1B	989.001031446043
11.06.2020	20:08:46.890	11.09.2020	10:35:48	3DD.003D7A9E1B	989.001031446043
11.06.2020	20:08:47.060	11.09.2020	10:35:48	3DD.003D7A9E1B	989.001031446043
11.06.2020	20:08:47.160	11.09.2020	10:35:48	3DD.003D7A9E1B	989.001031446043
11.06.2020	20:08:47.260	11.09.2020	10:35:48	3DD.003D7A9E1B	989.001031446043
11.06.2020	20:08:47.360	11.09.2020	10:35:48	3DD.003D7A9E1B	989.001031446043
11.06.2020	20:08:47.460	11.09.2020	10:35:48	3DD.003D7A9E1B	989.001031446043
11.06.2020	20:08:47.560	11.09.2020	10:35:48	3DD.003D7A9E1B	989.001031446043
11.06.2020	20:08:47.660	11.09.2020	10:35:48	3DD.003D7A9E1B	989.001031446043
11.06.2020	20:08:47.760	11.09.2020	10:35:48	3DD.003D7A9E1B	989.001031446043
11.06.2020	20:08:47.890	11.09.2020	10:35:48	3DD.003D7A9E1B	989.001031446043
11.06.2020	20:08:48.050	11.09.2020	10:35:48	3DD.003D7A9E1B	989.001031446043
11.06.2020	20:08:48.180	11.09.2020	10:35:48	3DD.003D7A9E1B	989.001031446043
11.06.2020	20:08:48.220	11.09.2020	10:35:48	3DD.003D7A9E1B	989.001031446043
11.06.2020	20:08:48.330	11.09.2020	10:35:48	3DD.003D7A9E1B	989.001031446043
11.06.2020	20:08:48.400	11.09.2020	10:35:48	3DD.003D7A9E1B	989.001031446043
11.06.2020	20:08:48.430	11.09.2020	10:35:48	3DD.003D7A9E1B	989.001031446043
11.06.2020	20:08:48.560	11.09.2020	10:35:48	3DD.003D7A9E1B	989.001031446043
11.06.2020	20:08:48.630	11.09.2020	10:35:48	3DD.003D7A9E1B	989.001031446043
11.06.2020	20:08:48.770	11.09.2020	10:35:48	3DD.003D7A9E1B	989.001031446043
11.06.2020	20:08:48.930	11.09.2020	10:35:48	3DD.003D7A9E1B	989.001031446043
11.06.2020	20:08:49.000	11.09.2020	10:35:48	3DD.003D7A9E1B	989.001031446043
11.06.2020	20:46:20.160	11.09.2020	10:35:48	3DD.003D7A9D95	989.001031445909
11.06.2020	20:46:20.280	11.09.2020	10:35:48	3DD.003D7A9D95	989.001031445909
11.06.2020	20:46:20.380	11.09.2020	10:35:48	3DD.003D7A9D95	989.001031445909
11.06.2020	20:46:20.480	11.09.2020	10:35:48	3DD.003D7A9D95	989.001031445909
11.06.2020	20:46:20.580	11.09.2020	10:35:48	3DD.003D7A9D95	989.001031445909
11.06.2020	20:46:20.680	11.09.2020	10:35:48	3DD.003D7A9D95	989.001031445909
11.06.2020	20:46:20.780	11.09.2020	10:35:48	3DD.003D7A9D95	989.001031445909
11.06.2020	20:46:20.880	11.09.2020	10:35:48	3DD.003D7A9D95	989.001031445909
11.06.2020	20:46:21.700	11.09.2020	10:35:48	3DD.003D7A9D95	989.001031445909
11.06.2020	20:46:21.870	11.09.2020	10:35:48	3DD.003D7A9D95	989.001031445909
11.06.2020	20:46:21.940	11.09.2020	10:35:48	3DD.003D7A9D95	989.001031445909
11.06.2020	20:46:22.540	11.09.2020	10:35:48	3DD.003D7A9D95	989.001031445909
11.06.2020	20:46:22.680	11.09.2020	10:35:48	3DD.003D7A9D95	989.001031445909
11.06.2020	20:46:22.810	11.09.2020	10:35:48	3DD.003D7A9D95	989.001031445909
11.06.2020	20:46:22.920	11.09.2020	10:35:48	3DD.003D7A9D95	989.001031445909
11.06.2020	20:46:23.020	11.09.2020	10:35:48	3DD.003D7A9D95	989.001031445909
11.06.2020	20:46:23.200	11.09.2020	10:35:48	3DD.003D7A9D95	989.001031445909
11.06.2020	20:46:23.300	11.09.2020	10:35:48	3DD.003D7A9D95	989.001031445909
11.06.2020	20:46:23.400	11.09.2020	10:35:48	3DD.003D7A9D95	989.001031445909
11.06.2020	20:46:23.500	11.09.2020	10:35:48	3DD.003D7A9D95	989.001031445909
11.06.2020	20:46:23.600	11.09.2020	10:35:48	3DD.003D7A9D95	989.001031445909
11.06.2020	20:46:23.700	11.09.2020	10:35:48	3DD.003D7A9D95	989.001031445909
11.06.2020	20:46:23.820	11.09.2020	10:35:48	3DD.003D7A9D95	989.001031445909
11.06.2020	20:46:23.920	11.09.2020	10:35:48	3DD.003D7A9D95	989.001031445909
11.06.2020	20:46:24.120	11.09.2020	10:35:48	3DD.003D7A9D95	989.001031445909
11.06.2020	20:46:24.420	11.09.2020	10:35:48	3DD.003D7A9D95	989.001031445909
11.06.2020	20:46:24.590	11.09.2020	10:35:48	3DD.003D7A9D95	989.001031445909
11.06.2020	20:46:24.720	11.09.2020	10:35:49	3DD.003D7A9D95	989.001031445909
11.06.2020	20:46:24.850	11.09.2020	10:35:49	3DD.003D7A9D95	989.001031445909
11.06.2020	20:46:24.920	11.09.2020	10:35:49	3DD.003D7A9D95	989.001031445909
11.06.2020	20:46:24.950	11.09.2020	10:35:49	3DD.003D7A9D95	989.001031445909
11.06.2020	20:46:25.100	11.09.2020	10:35:49	3DD.003D7A9D95	989.001031445909
11.06.2020	20:46:25.240	11.09.2020	10:35:49	3DD.003D7A9D95	989.001031445909
11.06.2020	20:46:25.410	11.09.2020	10:35:49	3DD.003D7A9D95	989.001031445909
11.06.2020	20:46:25.560	11.09.2020	10:35:49	3DD.003D7A9D95	989.001031445909
11.06.2020	20:46:25.670	11.09.2020	10:35:49	3DD.003D7A9D95	989.001031445909
11.06.2020	20:46:25.760	11.09.2020	10:35:49	3DD.003D7A9D95	989.001031445909
11.06.2020	20:46:25.870	11.09.2020	10:35:49	3DD.003D7A9D95	989.001031445909
11.06.2020	20:46:25.970	11.09.2020	10:35:49	3DD.003D7A9D95	989.001031445909
11.06.2020	20:46:26.140	11.09.2020	10:35:49	3DD.003D7A9D95	989.001031445909
11.06.2020	20:46:26.250	11.09.2020	10:35:49	3DD.003D7A9D95	989.001031445909
11.06.2020	20:46:26.370	11.09.2020	10:35:49	3DD.003D7A9D95	989.001031445909
11.06.2020	20:46:26.470	11.09.2020	10:35:49	3DD.003D7A9D95	989.001031445909
11.06.2020	20:46:26.600	11.09.2020	10:35:49	3DD.003D7A9D95	989.001031445909
11.06.2020	20:46:26.760	11.09.2020	10:35:49	3DD.003D7A9D95	989.001031445909
11.06.2020	20:46:26.930	11.09.2020	10:35:49	3DD.003D7A9D95	989.001031445909
11.06.2020	20:46:27.100	11.09.2020	10:35:49	3DD.003D7A9D95	989.001031445909
11.06.2020	20:46:27.210	11.09.2020	10:35:49	3DD.003D7A9D95	989.001031445909
11.06.2020	20:46:27.250	11.09.2020	10:35:49	3DD.003D7A9D95	989.001031445909
11.06.2020	20:46:27.290	11.09.2020	10:35:49	3DD.003D7A9D95	989.001031445909
11.06.2020	20:46:27.340	11.09.2020	10:35:49	3DD.003D7A9D95	989.001031445909
11.06.2020	20:46:27.410	11.09.2020	10:35:49	3DD.003D7A9D95	989.001031445909
11.06.2020	20:46:27.460	11.09.2020	10:35:49	3DD.003D7A9D95	989.001031445909
11.06.2020	20:46:27.520	11.09.2020	10:35:49	3DD.003D7A9D95	989.001031445909
11.06.2020	20:46:27.560	11.09.2020	10:35:49	3DD.003D7A9D95	989.001031445909
11.06.2020	20:46:27.610	11.09.2020	10:35:49	3DD.003D7A9D95	989.001031445909
11.06.2020	20:46:27.780	11.09.2020	10:35:49	3DD.003D7A9D95	989.001031445909
11.06.2020	20:46:27.890	11.09.2020	10:35:49	3DD.003D7A9D95	989.001031445909
11.06.2020	20:46:28.000	11.09.2020	10:35:49	3DD.003D7A9D95	989.001031445909
11.06.2020	20:46:28.100	11.09.2020	10:35:49	3DD.003D7A9D95	989.001031445909
11.06.2020	20:46:28.220	11.09.2020	10:35:49	3DD.003D7A9D95	989.001031445909
11.06.2020	20:46:28.310	11.09.2020	10:35:49	3DD.003D7A9D95	989.001031445909
11.06.2020	20:46:28.430	11.09.2020	10:35:49	3DD.003D7A9D95	989.001031445909
11.06.2020	20:46:28.530	11.09.2020	10:35:49	3DD.003D7A9D95	989.001031445909
11.06.2020	20:46:28.640	11.09.2020	10:35:49	3DD.003D7A9D95	989.001031445909
11.06.2020	20:46:28.690	11.09.2020	10:35:49	3DD.003D7A9D95	989.001031445909
11.06.2020	20:46:28.710	11.09.2020	10:35:49	3DD.003D7A9D95	989.001031445909
11.06.2020	20:46:28.780	11.09.2020	10:35:49	3DD.003D7A9D95	989.001031445909
11.06.2020	20:46:28.980	11.09.2020	10:35:49	3DD.003D7A9D95	989.001031445909
11.06.2020	20:46:29.160	11.09.2020	10:35:49	3DD.003D7A9D95	989.001031445909
11.06.2020	20:46:29.290	11.09.2020	10:35:49	3DD.003D7A9D95	989.001031445909
11.06.2020	20:46:29.450	11.09.2020	10:35:49	3DD.003D7A9D95	989.001031445909
11.06.2020	20:46:29.550	11.09.2020	10:35:49	3DD.003D7A9D95	989.001031445909
11.06.2020	20:46:29.650	11.09.2020	10:35:49	3DD.003D7A9D95	989.001031445909
11.06.2020	20:46:29.750	11.09.2020	10:35:49	3DD.003D7A9D95	989.001031445909
11.06.2020	20:46:29.850	11.09.2020	10:35:49	3DD.003D7A9D95	989.001031445909
11.06.2020	20:46:29.960	11.09.2020	10:35:49	3DD.003D7A9D95	989.001031445909
11.06.2020	20:46:30.070	11.09.2020	10:35:49	3DD.003D7A9D95	989.001031445909
11.06.2020	20:46:30.160	11.09.2020	10:35:49	3DD.003D7A9D95	989.001031445909
11.06.2020	20:46:30.300	11.09.2020	10:35:49	3DD.003D7A9D95	989.001031445909
11.06.2020	20:46:30.400	11.09.2020	10:35:49	3DD.003D7A9D95	989.001031445909
11.06.2020	20:46:30.540	11.09.2020	10:35:49	3DD.003D7A9D95	989.001031445909
11.06.2020	20:46:30.660	11.09.2020	10:35:49	3DD.003D7A9D95	989.001031445909
11.06.2020	20:46:30.770	11.09.2020	10:35:49	3DD.003D7A9D95	989.001031445909
11.06.2020	20:46:30.860	11.09.2020	10:35:49	3DD.003D7A9D95	989.001031445909
11.06.2020	20:46:30.990	11.09.2020	10:35:49	3DD.003D7A9D95	989.001031445909
11.06.2020	20:46:31.100	11.09.2020	10:35:49	3DD.003D7A9D95	989.001031445909
11.06.2020	20:46:31.200	11.09.2020	10:35:49	3DD.003D7A9D95	989.001031445909
11.06.2020	20:46:31.300	11.09.2020	10:35:49	3DD.003D7A9D95	989.001031445909
11.06.2020	20:46:31.410	11.09.2020	10:35:49	3DD.003D7A9D95	989.001031445909
11.06.2020	20:46:31.590	11.09.2020	10:35:49	3DD.003D7A9D95	989.001031445909
11.06.2020	20:46:31.740	11.09.2020	10:35:49	3DD.003D7A9D95	989.001031445909
11.06.2020	20:46:31.870	11.09.2020	10:35:49	3DD.003D7A9D95	989.001031445909
11.06.2020	20:46:31.970	11.09.2020	10:35:49	3DD.003D7A9D95	989.001031445909
11.06.2020	20:46:32.100	11.09.2020	10:35:49	3DD.003D7A9D95	989.001031445909
11.06.2020	20:46:32.260	11.09.2020	10:35:50	3DD.003D7A9D95	989.001031445909
11.06.2020	20:46:32.390	11.09.2020	10:35:50	3DD.003D7A9D95	989.001031445909
11.06.2020	20:46:32.490	11.09.2020	10:35:50	3DD.003D7A9D95	989.001031445909
11.06.2020	20:46:32.600	11.09.2020	10:35:50	3DD.003D7A9D95	989.001031445909
11.06.2020	20:46:32.710	11.09.2020	10:35:50	3DD.003D7A9D95	989.001031445909
11.06.2020	20:46:32.810	11.09.2020	10:35:50	3DD.003D7A9D95	989.001031445909
11.06.2020	20:46:32.970	11.09.2020	10:35:50	3DD.003D7A9D95	989.001031445909
11.06.2020	20:46:33.120	11.09.2020	10:35:50	3DD.003D7A9D95	989.001031445909
11.06.2020	20:46:33.250	11.09.2020	10:35:50	3DD.003D7A9D95	989.001031445909
11.06.2020	20:46:33.350	11.09.2020	10:35:50	3DD.003D7A9D95	989.001031445909
11.06.2020	20:46:33.460	11.09.2020	10:35:50	3DD.003D7A9D95	989.001031445909
11.06.2020	20:46:33.560	11.09.2020	10:35:50	3DD.003D7A9D95	989.001031445909
11.06.2020	20:46:33.660	11.09.2020	10:35:50	3DD.003D7A9D95	989.001031445909
11.06.2020	20:46:33.820	11.09.2020	10:35:50	3DD.003D7A9D95	989.001031445909
11.06.2020	20:46:33.950	11.09.2020	10:35:50	3DD.003D7A9D95	989.001031445909
11.06.2020	20:46:34.100	11.09.2020	10:35:50	3DD.003D7A9D95	989.001031445909
11.06.2020	20:46:34.190	11.09.2020	10:35:50	3DD.003D7A9D95	989.001031445909
11.06.2020	20:46:34.290	11.09.2020	10:35:50	3DD.003D7A9D95	989.001031445909
11.06.2020	20:46:34.420	11.09.2020	10:35:50	3DD.003D7A9D95	989.001031445909
11.06.2020	20:46:34.590	11.09.2020	10:35:50	3DD.003D7A9D95	989.001031445909
11.06.2020	20:46:34.710	11.09.2020	10:35:50	3DD.003D7A9D95	989.001031445909
11.06.2020	20:46:34.830	11.09.2020	10:35:50	3DD.003D7A9D95	989.001031445909
11.06.2020	20:46:35.000	11.09.2020	10:35:50	3DD.003D7A9D95	989.001031445909
11.06.2020	20:46:35.140	11.09.2020	10:35:50	3DD.003D7A9D95	989.001031445909
11.06.2020	20:46:35.270	11.09.2020	10:35:50	3DD.003D7A9D95	989.001031445909
11.06.2020	20:46:35.390	11.09.2020	10:35:50	3DD.003D7A9D95	989.001031445909
11.06.2020	20:46:35.730	11.09.2020	10:35:50	3DD.003D7A9D95	989.001031445909
11.06.2020	20:46:35.840	11.09.2020	10:35:50	3DD.003D7A9D95	989.001031445909
11.06.2020	20:46:35.940	11.09.2020	10:35:50	3DD.003D7A9D95	989.001031445909
11.06.2020	20:46:36.070	11.09.2020	10:35:50	3DD.003D7A9D95	989.001031445909
11.06.2020	20:46:36.170	11.09.2020	10:35:50	3DD.003D7A9D95	989.001031445909
11.06.2020	20:46:36.270	11.09.2020	10:35:50	3DD.003D7A9D95	989.001031445909
11.06.2020	20:46:36.370	11.09.2020	10:35:50	3DD.003D7A9D95	989.001031445909
11.06.2020	20:46:36.470	11.09.2020	10:35:50	3DD.003D7A9D95	989.001031445909
11.06.2020	20:46:36.570	11.09.2020	10:35:50	3DD.003D7A9D95	989.001031445909
11.06.2020	20:46:36.670	11.09.2020	10:35:50	3DD.003D7A9D95	989.001031445909
11.06.2020	20:46:36.770	11.09.2020	10:35:50	3DD.003D7A9D95	989.001031445909
11.06.2020	20:46:36.870	11.09.2020	10:35:50	3DD.003D7A9D95	989.001031445909
11.06.2020	20:46:36.970	11.09.2020	10:35:50	3DD.003D7A9D95	989.001031445909
11.06.2020	20:46:37.390	11.09.2020	10:35:50	3DD.003D7A9D95	989.001031445909
11.06.2020	20:46:37.490	11.09.2020	10:35:50	3DD.003D7A9D95	989.001031445909
11.06.2020	20:46:37.640	11.09.2020	10:35:50	3DD.003D7A9D95	989.001031445909
11.06.2020	20:46:37.830	11.09.2020	10:35:50	3DD.003D7A9D95	989.001031445909
11.06.2020	20:46:37.990	11.09.2020	10:35:50	3DD.003D7A9D95	989.001031445909
11.06.2020	20:46:38.110	11.09.2020	10:35:50	3DD.003D7A9D95	989.001031445909
11.06.2020	20:46:38.200	11.09.2020	10:35:50	3DD.003D7A9D95	989.001031445909
11.06.2020	20:46:38.300	11.09.2020	10:35:50	3DD.003D7A9D95	989.001031445909
11.06.2020	20:46:38.450	11.09.2020	10:35:50	3DD.003D7A9D95	989.001031445909
11.06.2020	20:46:38.540	11.09.2020	10:35:50	3DD.003D7A9D95	989.001031445909
11.06.2020	20:46:38.640	11.09.2020	10:35:50	3DD.003D7A9D95	989.001031445909
11.06.2020	20:46:38.740	11.09.2020	10:35:50	3DD.003D7A9D95	989.001031445909
11.06.2020	20:46:38.840	11.09.2020	10:35:50	3DD.003D7A9D95	989.001031445909
11.06.2020	20:46:38.940	11.09.2020	10:35:50	3DD.003D7A9D95	989.001031445909
11.06.2020	20:46:39.040	11.09.2020	10:35:50	3DD.003D7A9D95	989.001031445909
11.06.2020	20:46:39.140	11.09.2020	10:35:50	3DD.003D7A9D95	989.001031445909
11.06.2020	20:46:39.240	11.09.2020	10:35:50	3DD.003D7A9D95	989.001031445909
11.06.2020	20:46:39.410	11.09.2020	10:35:50	3DD.003D7A9D95	989.001031445909
11.06.2020	20:51:40.190	11.09.2020	10:35:50	3DD.003D7A9D95	989.001031445909
11.06.2020	20:51:40.300	11.09.2020	10:35:50	3DD.003D7A9D95	989.001031445909
11.06.2020	20:51:40.400	11.09.2020	10:35:50	3DD.003D7A9D95	989.001031445909
11.06.2020	20:51:40.500	11.09.2020	10:35:50	3DD.003D7A9D95	989.001031445909
11.06.2020	20:51:40.600	11.09.2020	10:35:50	3DD.003D7A9D95	989.001031445909
11.06.2020	20:51:40.700	11.09.2020	10:35:50	3DD.003D7A9D95	989.001031445909
11.06.2020	20:51:40.800	11.09.2020	10:35:50	3DD.003D7A9D95	989.001031445909
11.06.2020	20:51:40.890	11.09.2020	10:35:50	3DD.003D7A9D95	989.001031445909
11.06.2020	20:51:41.500	11.09.2020	10:35:50	3DD.003D7A9D95	989.001031445909
11.06.2020	20:51:41.570	11.09.2020	10:35:50	3DD.003D7A9D95	989.001031445909
11.06.2020	20:51:41.600	11.09.2020	10:35:51	3DD.003D7A9D95	989.001031445909
11.06.2020	20:51:41.720	11.09.2020	10:35:51	3DD.003D7A9D95	989.001031445909
11.06.2020	20:51:41.820	11.09.2020	10:35:51	3DD.003D7A9D95	989.001031445909
11.06.2020	20:51:41.920	11.09.2020	10:35:51	3DD.003D7A9D95	989.001031445909
11.06.2020	20:51:42.090	11.09.2020	10:35:51	3DD.003D7A9D95	989.001031445909
11.06.2020	20:51:42.190	11.09.2020	10:35:51	3DD.003D7A9D95	989.001031445909
11.06.2020	20:51:42.330	11.09.2020	10:35:51	3DD.003D7A9D95	989.001031445909
11.06.2020	20:51:42.430	11.09.2020	10:35:51	3DD.003D7A9D95	989.001031445909
11.06.2020	20:51:42.530	11.09.2020	10:35:51	3DD.003D7A9D95	989.001031445909
11.06.2020	20:51:42.670	11.09.2020	10:35:51	3DD.003D7A9D95	989.001031445909
11.06.2020	20:51:42.800	11.09.2020	10:35:51	3DD.003D7A9D95	989.001031445909
11.06.2020	20:51:42.890	11.09.2020	10:35:51	3DD.003D7A9D95	989.001031445909
11.06.2020	20:51:43.000	11.09.2020	10:35:51	3DD.003D7A9D95	989.001031445909
11.06.2020	20:51:43.190	11.09.2020	10:35:51	3DD.003D7A9D95	989.001031445909
11.06.2020	20:51:43.290	11.09.2020	10:35:51	3DD.003D7A9D95	989.001031445909
11.06.2020	20:51:43.400	11.09.2020	10:35:51	3DD.003D7A9D95	989.001031445909
11.06.2020	20:51:43.490	11.09.2020	10:35:51	3DD.003D7A9D95	989.001031445909
11.06.2020	20:51:43.590	11.09.2020	10:35:51	3DD.003D7A9D95	989.001031445909
11.06.2020	20:51:43.700	11.09.2020	10:35:51	3DD.003D7A9D95	989.001031445909
11.06.2020	20:51:43.830	11.09.2020	10:35:51	3DD.003D7A9D95	989.001031445909
11.06.2020	20:51:43.920	11.09.2020	10:35:51	3DD.003D7A9D95	989.001031445909
11.06.2020	20:51:44.020	11.09.2020	10:35:51	3DD.003D7A9D95	989.001031445909
11.06.2020	20:51:44.140	11.09.2020	10:35:51	3DD.003D7A9D95	989.001031445909
11.06.2020	20:51:44.240	11.09.2020	10:35:51	3DD.003D7A9D95	989.001031445909
11.06.2020	20:51:44.340	11.09.2020	10:35:51	3DD.003D7A9D95	989.001031445909
11.06.2020	20:51:44.520	11.09.2020	10:35:51	3DD.003D7A9D95	989.001031445909
11.06.2020	20:51:45.340	11.09.2020	10:35:51	3DD.003D7A9D95	989.001031445909
11.06.2020	20:51:45.440	11.09.2020	10:35:51	3DD.003D7A9D95	989.001031445909
11.06.2020	20:51:45.540	11.09.2020	10:35:51	3DD.003D7A9D95	989.001031445909
11.06.2020	20:51:46.130	11.09.2020	10:35:51	3DD.003D7A9D95	989.001031445909
11.06.2020	20:51:46.230	11.09.2020	10:35:51	3DD.003D7A9D95	989.001031445909
11.06.2020	20:51:46.330	11.09.2020	10:35:51	3DD.003D7A9D95	989.001031445909
11.06.2020	20:51:46.430	11.09.2020	10:35:51	3DD.003D7A9D95	989.001031445909
11.06.2020	20:51:46.530	11.09.2020	10:35:51	3DD.003D7A9D95	989.001031445909
11.06.2020	20:51:46.630	11.09.2020	10:35:51	3DD.003D7A9D95	989.001031445909
11.06.2020	20:51:46.730	11.09.2020	10:35:51	3DD.003D7A9D95	989.001031445909
11.06.2020	20:51:46.830	11.09.2020	10:35:51	3DD.003D7A9D95	989.001031445909
11.06.2020	20:51:46.930	11.09.2020	10:35:51	3DD.003D7A9D95	989.001031445909
11.06.2020	20:51:47.030	11.09.2020	10:35:51	3DD.003D7A9D95	989.001031445909
11.06.2020	20:51:49.430	11.09.2020	10:35:51	3DD.003D7A9D95	989.001031445909
11.06.2020	20:51:49.550	11.09.2020	10:35:51	3DD.003D7A9D95	989.001031445909
11.06.2020	20:51:49.640	11.09.2020	10:35:51	3DD.003D7A9D95	989.001031445909
11.06.2020	20:51:49.740	11.09.2020	10:35:51	3DD.003D7A9D95	989.001031445909
11.06.2020	20:51:49.840	11.09.2020	10:35:51	3DD.003D7A9D95	989.001031445909
11.06.2020	20:51:49.970	11.09.2020	10:35:51	3DD.003D7A9D95	989.001031445909
11.06.2020	20:51:50.130	11.09.2020	10:35:51	3DD.003D7A9D95	989.001031445909
11.06.2020	20:51:50.240	11.09.2020	10:35:51	3DD.003D7A9D95	989.001031445909
11.06.2020	20:51:50.330	11.09.2020	10:35:51	3DD.003D7A9D95	989.001031445909
11.06.2020	20:51:50.440	11.09.2020	10:35:51	3DD.003D7A9D95	989.001031445909
11.06.2020	20:51:50.540	11.09.2020	10:35:51	3DD.003D7A9D95	989.001031445909
11.06.2020	20:51:50.680	11.09.2020	10:35:51	3DD.003D7A9D95	989.001031445909
11.06.2020	20:51:50.750	11.09.2020	10:35:51	3DD.003D7A9D95	989.001031445909
11.06.2020	20:51:50.900	11.09.2020	10:35:51	3DD.003D7A9D95	989.001031445909
11.06.2020	20:51:51.000	11.09.2020	10:35:51	3DD.003D7A9D95	989.001031445909
11.06.2020	20:51:51.100	11.09.2020	10:35:51	3DD.003D7A9D95	989.001031445909
11.06.2020	20:51:51.210	11.09.2020	10:35:51	3DD.003D7A9D95	989.001031445909
11.06.2020	20:51:51.300	11.09.2020	10:35:51	3DD.003D7A9D95	989.001031445909
11.06.2020	20:51:51.400	11.09.2020	10:35:51	3DD.003D7A9D95	989.001031445909
11.06.2020	20:51:54.400	11.09.2020	10:35:51	3DD.003D7A9D95	989.001031445909
11.06.2020	20:51:54.470	11.09.2020	10:35:51	3DD.003D7A9D95	989.001031445909
11.06.2020	20:51:54.590	11.09.2020	10:35:51	3DD.003D7A9D95	989.001031445909
11.06.2020	20:51:54.690	11.09.2020	10:35:51	3DD.003D7A9D95	989.001031445909
11.06.2020	20:51:54.800	11.09.2020	10:35:51	3DD.003D7A9D95	989.001031445909
11.06.2020	20:51:54.910	11.09.2020	10:35:51	3DD.003D7A9D95	989.001031445909
11.06.2020	20:51:55.040	11.09.2020	10:35:51	3DD.003D7A9D95	989.001031445909
11.06.2020	20:51:55.130	11.09.2020	10:35:52	3DD.003D7A9D95	989.001031445909
11.06.2020	20:51:55.230	11.09.2020	10:35:52	3DD.003D7A9D95	989.001031445909
11.06.2020	20:51:55.330	11.09.2020	10:35:52	3DD.003D7A9D95	989.001031445909
11.06.2020	20:51:55.430	11.09.2020	10:35:52	3DD.003D7A9D95	989.001031445909
11.06.2020	20:51:55.530	11.09.2020	10:35:52	3DD.003D7A9D95	989.001031445909
11.06.2020	20:51:56.460	11.09.2020	10:35:52	3DD.003D7A9D95	989.001031445909
11.06.2020	20:51:56.670	11.09.2020	10:35:52	3DD.003D7A9D95	989.001031445909
11.06.2020	20:51:56.770	11.09.2020	10:35:52	3DD.003D7A9D95	989.001031445909
11.06.2020	20:51:56.870	11.09.2020	10:35:52	3DD.003D7A9D95	989.001031445909
11.06.2020	20:51:56.970	11.09.2020	10:35:52	3DD.003D7A9D95	989.001031445909
11.06.2020	20:51:57.070	11.09.2020	10:35:52	3DD.003D7A9D95	989.001031445909
11.06.2020	20:51:57.170	11.09.2020	10:35:52	3DD.003D7A9D95	989.001031445909
11.06.2020	20:51:57.210	11.09.2020	10:35:52	3DD.003D7A9D95	989.001031445909
11.06.2020	20:51:57.240	11.09.2020	10:35:52	3DD.003D7A9D95	989.001031445909
11.06.2020	20:51:57.310	11.09.2020	10:35:52	3DD.003D7A9D95	989.001031445909
11.06.2020	20:51:57.360	11.09.2020	10:35:52	3DD.003D7A9D95	989.001031445909
11.06.2020	20:51:57.410	11.09.2020	10:35:52	3DD.003D7A9D95	989.001031445909
11.06.2020	20:51:57.460	11.09.2020	10:35:52	3DD.003D7A9D95	989.001031445909
11.06.2020	20:51:57.510	11.09.2020	10:35:52	3DD.003D7A9D95	989.001031445909
11.06.2020	20:51:57.580	11.09.2020	10:35:52	3DD.003D7A9D95	989.001031445909
11.06.2020	20:51:57.630	11.09.2020	10:35:52	3DD.003D7A9D95	989.001031445909
11.06.2020	20:51:57.680	11.09.2020	10:35:52	3DD.003D7A9D95	989.001031445909
11.06.2020	20:51:57.740	11.09.2020	10:35:52	3DD.003D7A9D95	989.001031445909
11.06.2020	20:51:57.820	11.09.2020	10:35:52	3DD.003D7A9D95	989.001031445909
11.06.2020	20:51:57.870	11.09.2020	10:35:52	3DD.003D7A9D95	989.001031445909
11.06.2020	20:51:57.900	11.09.2020	10:35:52	3DD.003D7A9D95	989.001031445909
11.06.2020	20:51:57.970	11.09.2020	10:35:52	3DD.003D7A9D95	989.001031445909
11.06.2020	20:51:58.020	11.09.2020	10:35:52	3DD.003D7A9D95	989.001031445909
11.06.2020	20:51:58.190	11.09.2020	10:35:52	3DD.003D7A9D95	989.001031445909
11.06.2020	20:51:58.310	11.09.2020	10:35:52	3DD.003D7A9D95	989.001031445909
11.06.2020	20:51:58.410	11.09.2020	10:35:52	3DD.003D7A9D95	989.001031445909
11.06.2020	20:51:58.540	11.09.2020	10:35:52	3DD.003D7A9D95	989.001031445909
11.06.2020	20:51:58.640	11.09.2020	10:35:52	3DD.003D7A9D95	989.001031445909
11.06.2020	20:51:59.130	11.09.2020	10:35:52	3DD.003D7A9D95	989.001031445909
11.06.2020	20:51:59.200	11.09.2020	10:35:52	3DD.003D7A9D95	989.001031445909
11.06.2020	20:51:59.370	11.09.2020	10:35:52	3DD.003D7A9D95	989.001031445909
11.06.2020	20:51:59.440	11.09.2020	10:35:52	3DD.003D7A9D95	989.001031445909
11.06.2020	20:51:59.470	11.09.2020	10:35:52	3DD.003D7A9D95	989.001031445909
11.06.2020	20:51:59.590	11.09.2020	10:35:52	3DD.003D7A9D95	989.001031445909
11.06.2020	20:51:59.690	11.09.2020	10:35:52	3DD.003D7A9D95	989.001031445909
11.06.2020	20:51:59.790	11.09.2020	10:35:52	3DD.003D7A9D95	989.001031445909
11.06.2020	20:51:59.900	11.09.2020	10:35:52	3DD.003D7A9D95	989.001031445909
11.06.2020	20:52:00.000	11.09.2020	10:35:52	3DD.003D7A9D95	989.001031445909
11.06.2020	20:52:00.110	11.09.2020	10:35:52	3DD.003D7A9D95	989.001031445909
11.06.2020	20:52:00.210	11.09.2020	10:35:52	3DD.003D7A9D95	989.001031445909
11.06.2020	20:52:00.320	11.09.2020	10:35:52	3DD.003D7A9D95	989.001031445909
11.06.2020	20:52:00.450	11.09.2020	10:35:52	3DD.003D7A9D95	989.001031445909
11.06.2020	20:52:00.550	11.09.2020	10:35:52	3DD.003D7A9D95	989.001031445909
11.06.2020	20:52:00.680	11.09.2020	10:35:52	3DD.003D7A9D95	989.001031445909
11.06.2020	20:52:00.770	11.09.2020	10:35:52	3DD.003D7A9D95	989.001031445909
11.06.2020	20:52:00.870	11.09.2020	10:35:52	3DD.003D7A9D95	989.001031445909
11.06.2020	20:52:00.970	11.09.2020	10:35:52	3DD.003D7A9D95	989.001031445909
11.06.2020	20:52:01.120	11.09.2020	10:35:52	3DD.003D7A9D95	989.001031445909
11.06.2020	20:52:01.260	11.09.2020	10:35:52	3DD.003D7A9D95	989.001031445909
11.06.2020	20:52:01.430	11.09.2020	10:35:52	3DD.003D7A9D95	989.001031445909
11.06.2020	20:52:01.530	11.09.2020	10:35:52	3DD.003D7A9D95	989.001031445909
11.06.2020	20:52:01.630	11.09.2020	10:35:52	3DD.003D7A9D95	989.001031445909
11.06.2020	20:52:01.730	11.09.2020	10:35:52	3DD.003D7A9D95	989.001031445909
11.06.2020	20:52:01.830	11.09.2020	10:35:52	3DD.003D7A9D95	989.001031445909
11.06.2020	20:52:01.930	11.09.2020	10:35:52	3DD.003D7A9D95	989.001031445909
11.06.2020	20:52:02.030	11.09.2020	10:35:52	3DD.003D7A9D95	989.001031445909
11.06.2020	20:52:02.130	11.09.2020	10:35:52	3DD.003D7A9D95	989.001031445909
11.06.2020	20:52:02.280	11.09.2020	10:35:52	3DD.003D7A9D95	989.001031445909
11.06.2020	20:52:02.380	11.09.2020	10:35:52	3DD.003D7A9D95	989.001031445909
11.06.2020	20:52:02.480	11.09.2020	10:35:52	3DD.003D7A9D95	989.001031445909
11.06.2020	20:52:02.580	11.09.2020	10:35:52	3DD.003D7A9D95	989.001031445909
11.06.2020	20:52:02.680	11.09.2020	10:35:52	3DD.003D7A9D95	989.001031445909
11.06.2020	20:52:02.780	11.09.2020	10:35:53	3DD.003D7A9D95	989.001031445909
11.06.2020	20:52:02.900	11.09.2020	10:35:53	3DD.003D7A9D95	989.001031445909
11.06.2020	20:52:03.000	11.09.2020	10:35:53	3DD.003D7A9D95	989.001031445909
11.06.2020	20:52:15.290	11.09.2020	10:35:53	3DD.003D7A9D95	989.001031445909
11.06.2020	20:52:15.410	11.09.2020	10:35:53	3DD.003D7A9D95	989.001031445909
11.06.2020	20:52:15.480	11.09.2020	10:35:53	3DD.003D7A9D95	989.001031445909
11.06.2020	20:52:15.600	11.09.2020	10:35:53	3DD.003D7A9D95	989.001031445909
11.06.2020	20:52:15.700	11.09.2020	10:35:53	3DD.003D7A9D95	989.001031445909
11.06.2020	20:52:15.810	11.09.2020	10:35:53	3DD.003D7A9D95	989.001031445909
11.06.2020	20:52:16.070	11.09.2020	10:35:53	3DD.003D7A9D95	989.001031445909
11.06.2020	20:52:16.160	11.09.2020	10:35:53	3DD.003D7A9D95	989.001031445909
11.06.2020	20:52:16.290	11.09.2020	10:35:53	3DD.003D7A9D95	989.001031445909
11.06.2020	20:52:16.360	11.09.2020	10:35:53	3DD.003D7A9D95	989.001031445909
11.06.2020	20:52:16.390	11.09.2020	10:35:53	3DD.003D7A9D95	989.001031445909
11.06.2020	20:52:16.490	11.09.2020	10:35:53	3DD.003D7A9D95	989.001031445909
11.06.2020	20:52:16.620	11.09.2020	10:35:53	3DD.003D7A9D95	989.001031445909
11.06.2020	20:52:16.710	11.09.2020	10:35:53	3DD.003D7A9D95	989.001031445909
11.06.2020	20:52:16.820	11.09.2020	10:35:53	3DD.003D7A9D95	989.001031445909
11.06.2020	20:52:16.920	11.09.2020	10:35:53	3DD.003D7A9D95	989.001031445909
11.06.2020	20:52:17.020	11.09.2020	10:35:53	3DD.003D7A9D95	989.001031445909
11.06.2020	20:52:17.470	11.09.2020	10:35:53	3DD.003D7A9D95	989.001031445909
11.06.2020	20:52:17.560	11.09.2020	10:35:53	3DD.003D7A9D95	989.001031445909
11.06.2020	20:52:17.660	11.09.2020	10:35:53	3DD.003D7A9D95	989.001031445909
11.06.2020	20:52:17.760	11.09.2020	10:35:53	3DD.003D7A9D95	989.001031445909
11.06.2020	20:52:17.860	11.09.2020	10:35:53	3DD.003D7A9D95	989.001031445909
11.06.2020	20:52:17.960	11.09.2020	10:35:53	3DD.003D7A9D95	989.001031445909
11.06.2020	20:52:18.060	11.09.2020	10:35:53	3DD.003D7A9D95	989.001031445909
11.06.2020	20:52:18.160	11.09.2020	10:35:53	3DD.003D7A9D95	989.001031445909
11.06.2020	20:52:18.260	11.09.2020	10:35:53	3DD.003D7A9D95	989.001031445909
11.06.2020	20:52:18.360	11.09.2020	10:35:53	3DD.003D7A9D95	989.001031445909
11.06.2020	20:52:18.500	11.09.2020	10:35:53	3DD.003D7A9D95	989.001031445909
11.06.2020	20:52:18.590	11.09.2020	10:35:53	3DD.003D7A9D95	989.001031445909
11.06.2020	20:52:18.720	11.09.2020	10:35:53	3DD.003D7A9D95	989.001031445909
11.06.2020	20:52:18.820	11.09.2020	10:35:53	3DD.003D7A9D95	989.001031445909
11.06.2020	20:52:18.920	11.09.2020	10:35:53	3DD.003D7A9D95	989.001031445909
11.06.2020	20:52:19.020	11.09.2020	10:35:53	3DD.003D7A9D95	989.001031445909
11.06.2020	20:52:19.120	11.09.2020	10:35:53	3DD.003D7A9D95	989.001031445909
11.06.2020	20:52:19.270	11.09.2020	10:35:53	3DD.003D7A9D95	989.001031445909
11.06.2020	20:52:19.370	11.09.2020	10:35:53	3DD.003D7A9D95	989.001031445909
11.06.2020	20:58:40.880	11.09.2020	10:35:53	3DD.003D7A9E1B	989.001031446043
11.06.2020	20:58:40.950	11.09.2020	10:35:53	3DD.003D7A9E1B	989.001031446043
11.06.2020	20:58:41.360	11.09.2020	10:35:53	3DD.003D7A9E1B	989.001031446043
11.06.2020	20:58:41.460	11.09.2020	10:35:53	3DD.003D7A9E1B	989.001031446043
11.06.2020	20:58:41.560	11.09.2020	10:35:53	3DD.003D7A9E1B	989.001031446043
11.06.2020	20:58:41.840	11.09.2020	10:35:53	3DD.003D7A9E1B	989.001031446043
11.06.2020	20:58:41.950	11.09.2020	10:35:53	3DD.003D7A9E1B	989.001031446043
11.06.2020	20:58:42.060	11.09.2020	10:35:53	3DD.003D7A9E1B	989.001031446043
11.06.2020	20:58:42.180	11.09.2020	10:35:53	3DD.003D7A9E1B	989.001031446043
11.06.2020	20:58:42.300	11.09.2020	10:35:53	3DD.003D7A9E1B	989.001031446043
11.06.2020	20:58:42.410	11.09.2020	10:35:53	3DD.003D7A9E1B	989.001031446043
11.06.2020	20:58:43.010	11.09.2020	10:35:53	3DD.003D7A9D95	989.001031445909
11.06.2020	20:58:43.110	11.09.2020	10:35:53	3DD.003D7A9D95	989.001031445909
11.06.2020	20:58:43.220	11.09.2020	10:35:53	3DD.003D7A9D95	989.001031445909
11.06.2020	20:58:43.570	11.09.2020	10:35:53	3DD.003D7A9D95	989.001031445909
11.06.2020	20:58:43.740	11.09.2020	10:35:53	3DD.003D7A9D95	989.001031445909
11.06.2020	20:58:43.820	11.09.2020	10:35:53	3DD.003D7A9D95	989.001031445909
11.06.2020	20:58:43.930	11.09.2020	10:35:53	3DD.003D7A9D95	989.001031445909
11.06.2020	20:58:44.030	11.09.2020	10:35:53	3DD.003D7A9D95	989.001031445909
11.06.2020	20:58:44.130	11.09.2020	10:35:53	3DD.003D7A9D95	989.001031445909
11.06.2020	20:58:44.250	11.09.2020	10:35:53	3DD.003D7A9D95	989.001031445909
11.06.2020	20:58:44.350	11.09.2020	10:35:53	3DD.003D7A9D95	989.001031445909
11.06.2020	20:58:44.720	11.09.2020	10:35:53	3DD.003D7A9D95	989.001031445909
11.06.2020	20:58:44.860	11.09.2020	10:35:53	3DD.003D7A9D95	989.001031445909
11.06.2020	20:58:44.990	11.09.2020	10:35:53	3DD.003D7A9D95	989.001031445909
11.06.2020	20:58:45.090	11.09.2020	10:35:53	3DD.003D7A9D95	989.001031445909
11.06.2020	20:58:45.190	11.09.2020	10:35:53	3DD.003D7A9D95	989.001031445909
11.06.2020	20:58:45.290	11.09.2020	10:35:54	3DD.003D7A9D95	989.001031445909
11.06.2020	20:58:45.410	11.09.2020	10:35:54	3DD.003D7A9D95	989.001031445909
11.06.2020	20:58:45.490	11.09.2020	10:35:54	3DD.003D7A9D95	989.001031445909
11.06.2020	20:58:45.960	11.09.2020	10:35:54	3DD.003D7A9D95	989.001031445909
11.06.2020	20:58:46.060	11.09.2020	10:35:54	3DD.003D7A9D95	989.001031445909
11.06.2020	20:58:46.230	11.09.2020	10:35:54	3DD.003D7A9D95	989.001031445909
11.06.2020	20:58:46.310	11.09.2020	10:35:54	3DD.003D7A9D95	989.001031445909
11.06.2020	20:58:46.420	11.09.2020	10:35:54	3DD.003D7A9D95	989.001031445909
11.06.2020	20:58:46.530	11.09.2020	10:35:54	3DD.003D7A9D95	989.001031445909
11.06.2020	20:58:46.640	11.09.2020	10:35:54	3DD.003D7A9D95	989.001031445909
11.06.2020	20:58:46.740	11.09.2020	10:35:54	3DD.003D7A9D95	989.001031445909
11.06.2020	20:58:46.840	11.09.2020	10:35:54	3DD.003D7A9D95	989.001031445909
11.06.2020	20:58:47.150	11.09.2020	10:35:54	3DD.003D7A9D95	989.001031445909
11.06.2020	20:58:47.420	11.09.2020	10:35:54	3DD.003D7A9D95	989.001031445909
11.06.2020	20:58:47.660	11.09.2020	10:35:54	3DD.003D7A9D95	989.001031445909
11.06.2020	20:58:47.760	11.09.2020	10:35:54	3DD.003D7A9D95	989.001031445909
11.06.2020	20:58:47.890	11.09.2020	10:35:54	3DD.003D7A9D95	989.001031445909
11.06.2020	20:58:48.000	11.09.2020	10:35:54	3DD.003D7A9D95	989.001031445909
11.06.2020	20:58:48.090	11.09.2020	10:35:54	3DD.003D7A9D95	989.001031445909
11.06.2020	20:58:48.190	11.09.2020	10:35:54	3DD.003D7A9D95	989.001031445909
11.06.2020	20:58:48.290	11.09.2020	10:35:54	3DD.003D7A9D95	989.001031445909
11.06.2020	20:58:48.380	11.09.2020	10:35:54	3DD.003D7A9D95	989.001031445909
11.06.2020	20:58:48.480	11.09.2020	10:35:54	3DD.003D7A9D95	989.001031445909
11.06.2020	20:58:49.900	11.09.2020	10:35:54	3DD.003D7A9D95	989.001031445909
11.06.2020	20:58:49.970	11.09.2020	10:35:54	3DD.003D7A9D95	989.001031445909
11.06.2020	20:58:50.330	11.09.2020	10:35:54	3DD.003D7A9D95	989.001031445909
11.06.2020	20:58:50.420	11.09.2020	10:35:54	3DD.003D7A9D95	989.001031445909
11.06.2020	20:58:51.270	11.09.2020	10:35:54	3DD.003D7A9D95	989.001031445909
11.06.2020	20:58:51.370	11.09.2020	10:35:54	3DD.003D7A9D95	989.001031445909
11.06.2020	20:58:51.740	11.09.2020	10:35:54	3DD.003D7A9E1B	989.001031446043
11.06.2020	20:58:51.940	11.09.2020	10:35:54	3DD.003D7A9D95	989.001031445909
11.06.2020	20:58:52.030	11.09.2020	10:35:54	3DD.003D7A9D95	989.001031445909
11.06.2020	20:58:52.140	11.09.2020	10:35:54	3DD.003D7A9D95	989.001031445909
11.06.2020	20:58:52.240	11.09.2020	10:35:54	3DD.003D7A9D95	989.001031445909
11.06.2020	20:58:52.340	11.09.2020	10:35:54	3DD.003D7A9D95	989.001031445909
11.06.2020	20:58:52.440	11.09.2020	10:35:54	3DD.003D7A9D95	989.001031445909
11.06.2020	20:58:53.380	11.09.2020	10:35:54	3DD.003D7A9D95	989.001031445909
11.06.2020	20:58:53.490	11.09.2020	10:35:54	3DD.003D7A9D95	989.001031445909
11.06.2020	20:58:53.620	11.09.2020	10:35:54	3DD.003D7A9D95	989.001031445909
11.06.2020	20:58:53.710	11.09.2020	10:35:54	3DD.003D7A9D95	989.001031445909
11.06.2020	20:58:53.840	11.09.2020	10:35:54	3DD.003D7A9D95	989.001031445909
11.06.2020	20:58:53.940	11.09.2020	10:35:54	3DD.003D7A9D95	989.001031445909
11.06.2020	20:58:54.070	11.09.2020	10:35:54	3DD.003D7A9D95	989.001031445909
11.06.2020	20:58:54.170	11.09.2020	10:35:54	3DD.003D7A9D95	989.001031445909
11.06.2020	20:58:54.860	11.09.2020	10:35:54	3DD.003D7A9D95	989.001031445909
11.06.2020	20:58:54.920	11.09.2020	10:35:54	3DD.003D7A9D95	989.001031445909
11.06.2020	20:58:54.950	11.09.2020	10:35:54	3DD.003D7A9D95	989.001031445909
11.06.2020	20:58:55.080	11.09.2020	10:35:54	3DD.003D7A9D95	989.001031445909
11.06.2020	20:58:55.360	11.09.2020	10:35:54	3DD.003D7A9D95	989.001031445909
11.06.2020	20:58:55.410	11.09.2020	10:35:54	3DD.003D7A9D95	989.001031445909
11.06.2020	20:58:55.530	11.09.2020	10:35:54	3DD.003D7A9D95	989.001031445909
11.06.2020	20:58:55.640	11.09.2020	10:35:54	3DD.003D7A9D95	989.001031445909
11.06.2020	20:58:55.730	11.09.2020	10:35:54	3DD.003D7A9D95	989.001031445909
11.06.2020	20:58:55.890	11.09.2020	10:35:54	3DD.003D7A9D95	989.001031445909
11.06.2020	20:58:56.000	11.09.2020	10:35:54	3DD.003D7A9D95	989.001031445909
11.06.2020	20:58:56.100	11.09.2020	10:35:54	3DD.003D7A9D95	989.001031445909
11.06.2020	20:58:56.200	11.09.2020	10:35:54	3DD.003D7A9D95	989.001031445909
11.06.2020	20:58:56.300	11.09.2020	10:35:54	3DD.003D7A9D95	989.001031445909
11.06.2020	20:58:56.440	11.09.2020	10:35:54	3DD.003D7A9D95	989.001031445909
11.06.2020	20:58:56.540	11.09.2020	10:35:54	3DD.003D7A9D95	989.001031445909
11.06.2020	20:58:56.670	11.09.2020	10:35:54	3DD.003D7A9D95	989.001031445909
11.06.2020	20:58:56.780	11.09.2020	10:35:54	3DD.003D7A9D95	989.001031445909
11.06.2020	20:58:56.870	11.09.2020	10:35:54	3DD.003D7A9D95	989.001031445909
11.06.2020	20:58:57.000	11.09.2020	10:35:54	3DD.003D7A9D95	989.001031445909
11.06.2020	20:58:57.170	11.09.2020	10:35:54	3DD.003D7A9D95	989.001031445909
11.06.2020	20:58:57.280	11.09.2020	10:35:54	3DD.003D7A9D95	989.001031445909
11.06.2020	20:58:57.380	11.09.2020	10:35:54	3DD.003D7A9D95	989.001031445909
11.06.2020	20:58:57.510	11.09.2020	10:35:54	3DD.003D7A9D95	989.001031445909
11.06.2020	20:58:57.620	11.09.2020	10:35:55	3DD.003D7A9D95	989.001031445909
11.06.2020	20:58:57.710	11.09.2020	10:35:55	3DD.003D7A9D95	989.001031445909
11.06.2020	20:58:57.840	11.09.2020	10:35:55	3DD.003D7A9D95	989.001031445909
11.06.2020	20:58:58.030	11.09.2020	10:35:55	3DD.003D7A9D95	989.001031445909
11.06.2020	20:58:58.160	11.09.2020	10:35:55	3DD.003D7A9D95	989.001031445909
11.06.2020	20:58:58.290	11.09.2020	10:35:55	3DD.003D7A9D95	989.001031445909
11.06.2020	20:58:58.420	11.09.2020	10:35:55	3DD.003D7A9D95	989.001031445909
11.06.2020	20:58:58.540	11.09.2020	10:35:55	3DD.003D7A9D95	989.001031445909
11.06.2020	20:58:58.640	11.09.2020	10:35:55	3DD.003D7A9D95	989.001031445909
11.06.2020	20:58:58.740	11.09.2020	10:35:55	3DD.003D7A9D95	989.001031445909
11.06.2020	20:58:58.890	11.09.2020	10:35:55	3DD.003D7A9D95	989.001031445909
11.06.2020	20:58:58.990	11.09.2020	10:35:55	3DD.003D7A9D95	989.001031445909
11.06.2020	20:58:59.100	11.09.2020	10:35:55	3DD.003D7A9D95	989.001031445909
11.06.2020	20:58:59.240	11.09.2020	10:35:55	3DD.003D7A9D95	989.001031445909
11.06.2020	20:58:59.340	11.09.2020	10:35:55	3DD.003D7A9D95	989.001031445909
11.06.2020	20:58:59.490	11.09.2020	10:35:55	3DD.003D7A9D95	989.001031445909
11.06.2020	20:58:59.560	11.09.2020	10:35:55	3DD.003D7A9D95	989.001031445909
11.06.2020	20:58:59.700	11.09.2020	10:35:55	3DD.003D7A9D95	989.001031445909
11.06.2020	20:58:59.800	11.09.2020	10:35:55	3DD.003D7A9D95	989.001031445909
11.06.2020	20:58:59.910	11.09.2020	10:35:55	3DD.003D7A9D95	989.001031445909
11.06.2020	20:59:00.020	11.09.2020	10:35:55	3DD.003D7A9D95	989.001031445909
11.06.2020	20:59:00.120	11.09.2020	10:35:55	3DD.003D7A9D95	989.001031445909
11.06.2020	20:59:00.230	11.09.2020	10:35:55	3DD.003D7A9D95	989.001031445909
11.06.2020	20:59:00.320	11.09.2020	10:35:55	3DD.003D7A9D95	989.001031445909
11.06.2020	20:59:00.470	11.09.2020	10:35:55	3DD.003D7A9D95	989.001031445909
11.06.2020	20:59:00.630	11.09.2020	10:35:55	3DD.003D7A9D95	989.001031445909
11.06.2020	20:59:00.740	11.09.2020	10:35:55	3DD.003D7A9D95	989.001031445909
11.06.2020	20:59:00.830	11.09.2020	10:35:55	3DD.003D7A9D95	989.001031445909
11.06.2020	20:59:00.930	11.09.2020	10:35:55	3DD.003D7A9D95	989.001031445909
11.06.2020	20:59:01.040	11.09.2020	10:35:55	3DD.003D7A9D95	989.001031445909
11.06.2020	20:59:01.130	11.09.2020	10:35:55	3DD.003D7A9D95	989.001031445909
11.06.2020	20:59:01.240	11.09.2020	10:35:55	3DD.003D7A9D95	989.001031445909
11.06.2020	20:59:01.330	11.09.2020	10:35:55	3DD.003D7A9D95	989.001031445909
11.06.2020	20:59:01.440	11.09.2020	10:35:55	3DD.003D7A9D95	989.001031445909
11.06.2020	20:59:01.540	11.09.2020	10:35:55	3DD.003D7A9D95	989.001031445909
11.06.2020	20:59:01.640	11.09.2020	10:35:55	3DD.003D7A9D95	989.001031445909
11.06.2020	20:59:01.730	11.09.2020	10:35:55	3DD.003D7A9D95	989.001031445909
11.06.2020	20:59:01.850	11.09.2020	10:35:55	3DD.003D7A9D95	989.001031445909
11.06.2020	20:59:01.950	11.09.2020	10:35:55	3DD.003D7A9D95	989.001031445909
11.06.2020	20:59:02.050	11.09.2020	10:35:55	3DD.003D7A9D95	989.001031445909
11.06.2020	20:59:02.140	11.09.2020	10:35:55	3DD.003D7A9D95	989.001031445909
11.06.2020	20:59:02.240	11.09.2020	10:35:55	3DD.003D7A9D95	989.001031445909
11.06.2020	20:59:02.350	11.09.2020	10:35:55	3DD.003D7A9D95	989.001031445909
11.06.2020	20:59:02.450	11.09.2020	10:35:55	3DD.003D7A9D95	989.001031445909
11.06.2020	20:59:02.540	11.09.2020	10:35:55	3DD.003D7A9D95	989.001031445909
11.06.2020	20:59:02.670	11.09.2020	10:35:55	3DD.003D7A9D95	989.001031445909
11.06.2020	20:59:02.790	11.09.2020	10:35:55	3DD.003D7A9D95	989.001031445909
11.06.2020	20:59:02.890	11.09.2020	10:35:55	3DD.003D7A9D95	989.001031445909
11.06.2020	20:59:02.990	11.09.2020	10:35:55	3DD.003D7A9D95	989.001031445909
11.06.2020	20:59:03.080	11.09.2020	10:35:55	3DD.003D7A9D95	989.001031445909
11.06.2020	20:59:03.390	11.09.2020	10:35:55	3DD.003D7A9D95	989.001031445909
11.06.2020	20:59:03.480	11.09.2020	10:35:55	3DD.003D7A9D95	989.001031445909
11.06.2020	20:59:03.580	11.09.2020	10:35:55	3DD.003D7A9D95	989.001031445909
11.06.2020	20:59:03.770	11.09.2020	10:35:55	3DD.003D7A9D95	989.001031445909
11.06.2020	20:59:03.850	11.09.2020	10:35:55	3DD.003D7A9D95	989.001031445909
11.06.2020	20:59:03.960	11.09.2020	10:35:55	3DD.003D7A9D95	989.001031445909
11.06.2020	20:59:04.220	11.09.2020	10:35:55	3DD.003D7A9D95	989.001031445909
11.06.2020	20:59:04.340	11.09.2020	10:35:55	3DD.003D7A9D95	989.001031445909
11.06.2020	20:59:04.430	11.09.2020	10:35:55	3DD.003D7A9D95	989.001031445909
11.06.2020	20:59:04.530	11.09.2020	10:35:55	3DD.003D7A9D95	989.001031445909
11.06.2020	20:59:04.630	11.09.2020	10:35:55	3DD.003D7A9D95	989.001031445909
11.06.2020	20:59:04.730	11.09.2020	10:35:55	3DD.003D7A9D95	989.001031445909
11.06.2020	20:59:04.830	11.09.2020	10:35:56	3DD.003D7A9D95	989.001031445909
11.06.2020	20:59:04.930	11.09.2020	10:35:56	3DD.003D7A9D95	989.001031445909
11.06.2020	20:59:05.040	11.09.2020	10:35:56	3DD.003D7A9D95	989.001031445909
11.06.2020	20:59:05.140	11.09.2020	10:35:56	3DD.003D7A9D95	989.001031445909
11.06.2020	20:59:05.280	11.09.2020	10:35:56	3DD.003D7A9D95	989.001031445909
11.06.2020	20:59:05.370	11.09.2020	10:35:56	3DD.003D7A9D95	989.001031445909
11.06.2020	20:59:05.480	11.09.2020	10:35:56	3DD.003D7A9D95	989.001031445909
11.06.2020	20:59:05.580	11.09.2020	10:35:56	3DD.003D7A9D95	989.001031445909
11.06.2020	20:59:05.670	11.09.2020	10:35:56	3DD.003D7A9D95	989.001031445909
11.06.2020	20:59:05.770	11.09.2020	10:35:56	3DD.003D7A9D95	989.001031445909
11.06.2020	20:59:05.870	11.09.2020	10:35:56	3DD.003D7A9D95	989.001031445909
11.06.2020	20:59:05.970	11.09.2020	10:35:56	3DD.003D7A9D95	989.001031445909
11.06.2020	20:59:06.210	11.09.2020	10:35:56	3DD.003D7A9D95	989.001031445909
11.06.2020	20:59:06.310	11.09.2020	10:35:56	3DD.003D7A9D95	989.001031445909
11.06.2020	20:59:06.410	11.09.2020	10:35:56	3DD.003D7A9D95	989.001031445909
11.06.2020	20:59:06.510	11.09.2020	10:35:56	3DD.003D7A9D95	989.001031445909
11.06.2020	20:59:06.610	11.09.2020	10:35:56	3DD.003D7A9D95	989.001031445909
11.06.2020	20:59:15.160	11.09.2020	10:35:56	3DD.003D7A9E1B	989.001031446043
11.06.2020	20:59:15.260	11.09.2020	10:35:56	3DD.003D7A9E1B	989.001031446043
11.06.2020	20:59:15.410	11.09.2020	10:35:56	3DD.003D7A9E1B	989.001031446043
11.06.2020	20:59:15.510	11.09.2020	10:35:56	3DD.003D7A9E1B	989.001031446043
11.06.2020	20:59:15.660	11.09.2020	10:35:56	3DD.003D7A9E1B	989.001031446043
11.06.2020	20:59:15.790	11.09.2020	10:35:56	3DD.003D7A9E1B	989.001031446043
11.06.2020	20:59:15.910	11.09.2020	10:35:56	3DD.003D7A9E1B	989.001031446043
11.06.2020	20:59:16.010	11.09.2020	10:35:56	3DD.003D7A9E1B	989.001031446043
11.06.2020	20:59:16.130	11.09.2020	10:35:56	3DD.003D7A9E1B	989.001031446043
11.06.2020	20:59:16.200	11.09.2020	10:35:56	3DD.003D7A9E1B	989.001031446043
11.06.2020	20:59:16.350	11.09.2020	10:35:56	3DD.003D7A9E1B	989.001031446043
11.06.2020	20:59:16.450	11.09.2020	10:35:56	3DD.003D7A9E1B	989.001031446043
11.06.2020	20:59:16.580	11.09.2020	10:35:56	3DD.003D7A9E1B	989.001031446043
11.06.2020	20:59:16.680	11.09.2020	10:35:56	3DD.003D7A9E1B	989.001031446043
11.06.2020	20:59:16.830	11.09.2020	10:35:56	3DD.003D7A9E1B	989.001031446043
11.06.2020	20:59:17.000	11.09.2020	10:35:56	3DD.003D7A9E1B	989.001031446043
11.06.2020	20:59:17.200	11.09.2020	10:35:56	3DD.003D7A9E1B	989.001031446043
11.06.2020	20:59:17.270	11.09.2020	10:35:56	3DD.003D7A9E1B	989.001031446043
11.06.2020	20:59:17.430	11.09.2020	10:35:56	3DD.003D7A9E1B	989.001031446043
11.06.2020	20:59:17.550	11.09.2020	10:35:56	3DD.003D7A9E1B	989.001031446043
11.06.2020	20:59:17.630	11.09.2020	10:35:56	3DD.003D7A9E1B	989.001031446043
11.06.2020	20:59:17.770	11.09.2020	10:35:56	3DD.003D7A9E1B	989.001031446043
11.06.2020	20:59:17.890	11.09.2020	10:35:56	3DD.003D7A9E1B	989.001031446043
11.06.2020	20:59:18.040	11.09.2020	10:35:56	3DD.003D7A9E1B	989.001031446043
11.06.2020	20:59:18.170	11.09.2020	10:35:56	3DD.003D7A9E1B	989.001031446043
11.06.2020	20:59:18.260	11.09.2020	10:35:56	3DD.003D7A9E1B	989.001031446043
11.06.2020	20:59:18.360	11.09.2020	10:35:56	3DD.003D7A9E1B	989.001031446043
11.06.2020	20:59:18.490	11.09.2020	10:35:56	3DD.003D7A9E1B	989.001031446043
11.06.2020	20:59:18.620	11.09.2020	10:35:56	3DD.003D7A9E1B	989.001031446043
11.06.2020	20:59:18.720	11.09.2020	10:35:56	3DD.003D7A9E1B	989.001031446043
11.06.2020	20:59:18.840	11.09.2020	10:35:56	3DD.003D7A9E1B	989.001031446043
11.06.2020	20:59:19.040	11.09.2020	10:35:56	3DD.003D7A9E1B	989.001031446043
11.06.2020	20:59:19.160	11.09.2020	10:35:56	3DD.003D7A9E1B	989.001031446043
11.06.2020	20:59:19.260	11.09.2020	10:35:56	3DD.003D7A9E1B	989.001031446043
11.06.2020	20:59:19.390	11.09.2020	10:35:56	3DD.003D7A9E1B	989.001031446043
11.06.2020	20:59:19.510	11.09.2020	10:35:56	3DD.003D7A9E1B	989.001031446043
11.06.2020	20:59:19.630	11.09.2020	10:35:56	3DD.003D7A9E1B	989.001031446043
11.06.2020	20:59:19.710	11.09.2020	10:35:56	3DD.003D7A9E1B	989.001031446043
11.06.2020	20:59:19.850	11.09.2020	10:35:56	3DD.003D7A9E1B	989.001031446043
11.06.2020	20:59:19.970	11.09.2020	10:35:56	3DD.003D7A9E1B	989.001031446043
11.06.2020	20:59:20.100	11.09.2020	10:35:56	3DD.003D7A9E1B	989.001031446043
11.06.2020	20:59:20.220	11.09.2020	10:35:56	3DD.003D7A9E1B	989.001031446043
11.06.2020	20:59:20.560	11.09.2020	10:35:56	3DD.003D7A9E1B	989.001031446043
11.06.2020	20:59:20.670	11.09.2020	10:35:56	3DD.003D7A9E1B	989.001031446043
11.06.2020	20:59:20.790	11.09.2020	10:35:56	3DD.003D7A9E1B	989.001031446043
11.06.2020	20:59:20.910	11.09.2020	10:35:56	3DD.003D7A9E1B	989.001031446043
11.06.2020	20:59:20.980	11.09.2020	10:35:56	3DD.003D7A9E1B	989.001031446043
11.06.2020	20:59:21.010	11.09.2020	10:35:56	3DD.003D7A9E1B	989.001031446043
11.06.2020	20:59:21.130	11.09.2020	10:35:56	3DD.003D7A9E1B	989.001031446043
11.06.2020	20:59:21.250	11.09.2020	10:35:56	3DD.003D7A9E1B	989.001031446043
11.06.2020	20:59:21.330	11.09.2020	10:35:57	3DD.003D7A9E1B	989.001031446043
11.06.2020	20:59:21.500	11.09.2020	10:35:57	3DD.003D7A9E1B	989.001031446043
11.06.2020	20:59:21.660	11.09.2020	10:35:57	3DD.003D7A9E1B	989.001031446043
11.06.2020	20:59:21.750	11.09.2020	10:35:57	3DD.003D7A9E1B	989.001031446043
11.06.2020	20:59:21.880	11.09.2020	10:35:57	3DD.003D7A9E1B	989.001031446043
11.06.2020	20:59:21.940	11.09.2020	10:35:57	3DD.003D7A9E1B	989.001031446043
11.06.2020	20:59:21.980	11.09.2020	10:35:57	3DD.003D7A9E1B	989.001031446043
11.06.2020	20:59:22.100	11.09.2020	10:35:57	3DD.003D7A9E1B	989.001031446043
11.06.2020	20:59:22.200	11.09.2020	10:35:57	3DD.003D7A9E1B	989.001031446043
11.06.2020	20:59:22.310	11.09.2020	10:35:57	3DD.003D7A9E1B	989.001031446043
11.06.2020	20:59:22.480	11.09.2020	10:35:57	3DD.003D7A9E1B	989.001031446043
11.06.2020	20:59:22.590	11.09.2020	10:35:57	3DD.003D7A9E1B	989.001031446043
11.06.2020	20:59:22.690	11.09.2020	10:35:57	3DD.003D7A9E1B	989.001031446043
11.06.2020	20:59:22.790	11.09.2020	10:35:57	3DD.003D7A9E1B	989.001031446043
11.06.2020	20:59:22.900	11.09.2020	10:35:57	3DD.003D7A9E1B	989.001031446043
11.06.2020	20:59:23.010	11.09.2020	10:35:57	3DD.003D7A9E1B	989.001031446043
11.06.2020	20:59:23.120	11.09.2020	10:35:57	3DD.003D7A9E1B	989.001031446043
11.06.2020	20:59:23.210	11.09.2020	10:35:57	3DD.003D7A9E1B	989.001031446043
11.06.2020	20:59:23.320	11.09.2020	10:35:57	3DD.003D7A9E1B	989.001031446043
11.06.2020	20:59:23.420	11.09.2020	10:35:57	3DD.003D7A9E1B	989.001031446043
11.06.2020	20:59:23.520	11.09.2020	10:35:57	3DD.003D7A9E1B	989.001031446043
11.06.2020	20:59:23.670	11.09.2020	10:35:57	3DD.003D7A9E1B	989.001031446043
11.06.2020	20:59:23.740	11.09.2020	10:35:57	3DD.003D7A9E1B	989.001031446043
11.06.2020	20:59:23.900	11.09.2020	10:35:57	3DD.003D7A9E1B	989.001031446043
11.06.2020	20:59:23.970	11.09.2020	10:35:57	3DD.003D7A9E1B	989.001031446043
11.06.2020	20:59:24.140	11.09.2020	10:35:57	3DD.003D7A9E1B	989.001031446043
11.06.2020	20:59:24.290	11.09.2020	10:35:57	3DD.003D7A9E1B	989.001031446043
11.06.2020	20:59:24.360	11.09.2020	10:35:57	3DD.003D7A9E1B	989.001031446043
11.06.2020	20:59:24.480	11.09.2020	10:35:57	3DD.003D7A9E1B	989.001031446043
11.06.2020	20:59:24.640	11.09.2020	10:35:57	3DD.003D7A9E1B	989.001031446043
11.06.2020	20:59:24.740	11.09.2020	10:35:57	3DD.003D7A9E1B	989.001031446043
11.06.2020	20:59:24.860	11.09.2020	10:35:57	3DD.003D7A9E1B	989.001031446043
11.06.2020	20:59:24.950	11.09.2020	10:35:57	3DD.003D7A9E1B	989.001031446043
11.06.2020	20:59:25.050	11.09.2020	10:35:57	3DD.003D7A9E1B	989.001031446043
11.06.2020	20:59:25.200	11.09.2020	10:35:57	3DD.003D7A9E1B	989.001031446043
11.06.2020	20:59:25.410	11.09.2020	10:35:57	3DD.003D7A9E1B	989.001031446043
11.06.2020	20:59:25.510	11.09.2020	10:35:57	3DD.003D7A9E1B	989.001031446043
11.06.2020	20:59:25.610	11.09.2020	10:35:57	3DD.003D7A9E1B	989.001031446043
11.06.2020	20:59:25.760	11.09.2020	10:35:57	3DD.003D7A9E1B	989.001031446043
11.06.2020	20:59:25.830	11.09.2020	10:35:57	3DD.003D7A9E1B	989.001031446043
11.06.2020	20:59:25.860	11.09.2020	10:35:57	3DD.003D7A9E1B	989.001031446043
11.06.2020	20:59:25.960	11.09.2020	10:35:57	3DD.003D7A9E1B	989.001031446043
11.06.2020	20:59:26.060	11.09.2020	10:35:57	3DD.003D7A9E1B	989.001031446043
11.06.2020	20:59:26.130	11.09.2020	10:35:57	3DD.003D7A9E1B	989.001031446043
11.06.2020	20:59:26.160	11.09.2020	10:35:57	3DD.003D7A9E1B	989.001031446043
11.06.2020	20:59:26.230	11.09.2020	10:35:57	3DD.003D7A9E1B	989.001031446043
11.06.2020	20:59:26.390	11.09.2020	10:35:57	3DD.003D7A9E1B	989.001031446043
11.06.2020	20:59:26.510	11.09.2020	10:35:57	3DD.003D7A9E1B	989.001031446043
11.06.2020	20:59:26.790	11.09.2020	10:35:57	3DD.003D7A9E1B	989.001031446043
11.06.2020	20:59:26.920	11.09.2020	10:35:57	3DD.003D7A9E1B	989.001031446043
11.06.2020	20:59:27.200	11.09.2020	10:35:57	3DD.003D7A9E1B	989.001031446043
11.06.2020	20:59:27.290	11.09.2020	10:35:57	3DD.003D7A9E1B	989.001031446043
11.06.2020	20:59:27.390	11.09.2020	10:35:57	3DD.003D7A9E1B	989.001031446043
11.06.2020	20:59:27.480	11.09.2020	10:35:57	3DD.003D7A9E1B	989.001031446043
11.06.2020	20:59:27.580	11.09.2020	10:35:57	3DD.003D7A9E1B	989.001031446043
11.06.2020	20:59:27.680	11.09.2020	10:35:57	3DD.003D7A9E1B	989.001031446043
11.06.2020	20:59:27.810	11.09.2020	10:35:57	3DD.003D7A9E1B	989.001031446043
11.06.2020	20:59:28.080	11.09.2020	10:35:57	3DD.003D7A9E1B	989.001031446043
11.06.2020	20:59:28.180	11.09.2020	10:35:57	3DD.003D7A9E1B	989.001031446043
11.06.2020	20:59:28.280	11.09.2020	10:35:57	3DD.003D7A9E1B	989.001031446043
11.06.2020	20:59:28.580	11.09.2020	10:35:57	3DD.003D7A9E1B	989.001031446043
11.06.2020	20:59:28.720	11.09.2020	10:35:57	3DD.003D7A9E1B	989.001031446043
11.06.2020	20:59:28.870	11.09.2020	10:35:57	3DD.003D7A9E1B	989.001031446043
11.06.2020	20:59:28.930	11.09.2020	10:35:57	3DD.003D7A9E1B	989.001031446043
11.06.2020	20:59:29.060	11.09.2020	10:35:57	3DD.003D7A9E1B	989.001031446043
11.06.2020	20:59:29.150	11.09.2020	10:35:57	3DD.003D7A9E1B	989.001031446043
11.06.2020	20:59:29.250	11.09.2020	10:35:58	3DD.003D7A9E1B	989.001031446043
11.06.2020	20:59:29.340	11.09.2020	10:35:58	3DD.003D7A9E1B	989.001031446043
11.06.2020	20:59:29.460	11.09.2020	10:35:58	3DD.003D7A9E1B	989.001031446043
11.06.2020	20:59:29.630	11.09.2020	10:35:58	3DD.003D7A9E1B	989.001031446043
11.06.2020	20:59:29.900	11.09.2020	10:35:58	3DD.003D7A9E1B	989.001031446043
11.06.2020	20:59:29.990	11.09.2020	10:35:58	3DD.003D7A9E1B	989.001031446043
11.06.2020	20:59:30.090	11.09.2020	10:35:58	3DD.003D7A9E1B	989.001031446043
11.06.2020	20:59:30.230	11.09.2020	10:35:58	3DD.003D7A9E1B	989.001031446043
11.06.2020	20:59:30.380	11.09.2020	10:35:58	3DD.003D7A9E1B	989.001031446043
11.06.2020	20:59:30.500	11.09.2020	10:35:58	3DD.003D7A9E1B	989.001031446043
11.06.2020	20:59:30.530	11.09.2020	10:35:58	3DD.003D7A9E1B	989.001031446043
11.06.2020	20:59:30.620	11.09.2020	10:35:58	3DD.003D7A9E1B	989.001031446043
11.06.2020	20:59:30.760	11.09.2020	10:35:58	3DD.003D7A9E1B	989.001031446043
11.06.2020	20:59:30.850	11.09.2020	10:35:58	3DD.003D7A9E1B	989.001031446043
11.06.2020	20:59:30.950	11.09.2020	10:35:58	3DD.003D7A9E1B	989.001031446043
11.06.2020	20:59:31.240	11.09.2020	10:35:58	3DD.003D7A9E1B	989.001031446043
11.06.2020	20:59:31.320	11.09.2020	10:35:58	3DD.003D7A9E1B	989.001031446043
11.06.2020	20:59:31.450	11.09.2020	10:35:58	3DD.003D7A9E1B	989.001031446043
11.06.2020	20:59:31.720	11.09.2020	10:35:58	3DD.003D7A9E1B	989.001031446043
11.06.2020	20:59:33.140	11.09.2020	10:35:58	3DD.003D7A9E1B	989.001031446043
11.06.2020	20:59:33.580	11.09.2020	10:35:58	3DD.003D7A9E1B	989.001031446043
11.06.2020	20:59:33.650	11.09.2020	10:35:58	3DD.003D7A9E1B	989.001031446043
11.06.2020	20:59:33.940	11.09.2020	10:35:58	3DD.003D7A9E1B	989.001031446043
11.06.2020	20:59:34.040	11.09.2020	10:35:58	3DD.003D7A9E1B	989.001031446043
11.06.2020	20:59:34.240	11.09.2020	10:35:58	3DD.003D7A9E1B	989.001031446043
11.06.2020	20:59:34.340	11.09.2020	10:35:58	3DD.003D7A9E1B	989.001031446043
11.06.2020	20:59:34.440	11.09.2020	10:35:58	3DD.003D7A9E1B	989.001031446043
11.06.2020	20:59:34.590	11.09.2020	10:35:58	3DD.003D7A9E1B	989.001031446043
11.06.2020	20:59:34.670	11.09.2020	10:35:58	3DD.003D7A9E1B	989.001031446043
11.06.2020	20:59:34.830	11.09.2020	10:35:58	3DD.003D7A9E1B	989.001031446043
11.06.2020	20:59:34.970	11.09.2020	10:35:58	3DD.003D7A9E1B	989.001031446043
11.06.2020	20:59:35.050	11.09.2020	10:35:58	3DD.003D7A9E1B	989.001031446043
11.06.2020	20:59:35.170	11.09.2020	10:35:58	3DD.003D7A9E1B	989.001031446043
11.06.2020	20:59:35.510	11.09.2020	10:35:58	3DD.003D7A9E1B	989.001031446043
11.06.2020	20:59:35.580	11.09.2020	10:35:58	3DD.003D7A9E1B	989.001031446043
11.06.2020	20:59:35.880	11.09.2020	10:35:58	3DD.003D7A9E1B	989.001031446043
11.06.2020	20:59:36.010	11.09.2020	10:35:58	3DD.003D7A9E1B	989.001031446043
11.06.2020	20:59:36.080	11.09.2020	10:35:58	3DD.003D7A9E1B	989.001031446043
11.06.2020	20:59:36.120	11.09.2020	10:35:58	3DD.003D7A9E1B	989.001031446043
11.06.2020	20:59:36.220	11.09.2020	10:35:58	3DD.003D7A9E1B	989.001031446043
11.06.2020	20:59:36.310	11.09.2020	10:35:58	3DD.003D7A9E1B	989.001031446043
11.06.2020	20:59:36.450	11.09.2020	10:35:58	3DD.003D7A9E1B	989.001031446043
11.06.2020	20:59:36.550	11.09.2020	10:35:58	3DD.003D7A9E1B	989.001031446043
11.06.2020	20:59:36.700	11.09.2020	10:35:58	3DD.003D7A9E1B	989.001031446043
11.06.2020	20:59:36.860	11.09.2020	10:35:58	3DD.003D7A9E1B	989.001031446043
11.06.2020	20:59:36.950	11.09.2020	10:35:58	3DD.003D7A9E1B	989.001031446043
11.06.2020	20:59:37.220	11.09.2020	10:35:58	3DD.003D7A9E1B	989.001031446043
11.06.2020	20:59:37.360	11.09.2020	10:35:58	3DD.003D7A9E1B	989.001031446043
11.06.2020	20:59:37.430	11.09.2020	10:35:58	3DD.003D7A9E1B	989.001031446043
11.06.2020	20:59:37.560	11.09.2020	10:35:58	3DD.003D7A9E1B	989.001031446043
11.06.2020	20:59:37.650	11.09.2020	10:35:58	3DD.003D7A9E1B	989.001031446043
11.06.2020	20:59:37.750	11.09.2020	10:35:58	3DD.003D7A9E1B	989.001031446043
11.06.2020	20:59:37.860	11.09.2020	10:35:58	3DD.003D7A9E1B	989.001031446043
11.06.2020	20:59:38.120	11.09.2020	10:35:58	3DD.003D7A9E1B	989.001031446043
11.06.2020	20:59:38.220	11.09.2020	10:35:58	3DD.003D7A9E1B	989.001031446043
11.06.2020	20:59:38.490	11.09.2020	10:35:58	3DD.003D7A9E1B	989.001031446043
11.06.2020	20:59:38.590	11.09.2020	10:35:58	3DD.003D7A9E1B	989.001031446043
11.06.2020	20:59:38.700	11.09.2020	10:35:58	3DD.003D7A9E1B	989.001031446043
11.06.2020	20:59:38.830	11.09.2020	10:35:58	3DD.003D7A9E1B	989.001031446043
11.06.2020	20:59:38.930	11.09.2020	10:35:58	3DD.003D7A9E1B	989.001031446043
11.06.2020	20:59:39.030	11.09.2020	10:35:58	3DD.003D7A9E1B	989.001031446043
11.06.2020	20:59:39.140	11.09.2020	10:35:58	3DD.003D7A9E1B	989.001031446043
11.06.2020	20:59:39.350	11.09.2020	10:35:58	3DD.003D7A9E1B	989.001031446043
11.06.2020	20:59:39.450	11.09.2020	10:35:58	3DD.003D7A9E1B	989.001031446043
11.06.2020	20:59:39.690	11.09.2020	10:35:58	3DD.003D7A9E1B	989.001031446043
11.06.2020	20:59:39.810	11.09.2020	10:35:58	3DD.003D7A9E1B	989.001031446043
11.06.2020	20:59:39.920	11.09.2020	10:35:58	3DD.003D7A9E1B	989.001031446043
11.06.2020	20:59:40.020	11.09.2020	10:35:58	3DD.003D7A9E1B	989.001031446043
11.06.2020	20:59:40.190	11.09.2020	10:35:59	3DD.003D7A9E1B	989.001031446043
11.06.2020	20:59:40.260	11.09.2020	10:35:59	3DD.003D7A9E1B	989.001031446043
11.06.2020	20:59:40.290	11.09.2020	10:35:59	3DD.003D7A9E1B	989.001031446043
11.06.2020	20:59:40.370	11.09.2020	10:35:59	3DD.003D7A9E1B	989.001031446043
11.06.2020	20:59:40.490	11.09.2020	10:35:59	3DD.003D7A9E1B	989.001031446043
11.06.2020	20:59:40.610	11.09.2020	10:35:59	3DD.003D7A9E1B	989.001031446043
11.06.2020	20:59:40.920	11.09.2020	10:35:59	3DD.003D7A9E1B	989.001031446043
11.06.2020	20:59:40.980	11.09.2020	10:35:59	3DD.003D7A9E1B	989.001031446043
11.06.2020	20:59:41.280	11.09.2020	10:35:59	3DD.003D7A9E1B	989.001031446043
11.06.2020	20:59:41.380	11.09.2020	10:35:59	3DD.003D7A9E1B	989.001031446043
11.06.2020	20:59:41.550	11.09.2020	10:35:59	3DD.003D7A9E1B	989.001031446043
11.06.2020	20:59:41.630	11.09.2020	10:35:59	3DD.003D7A9E1B	989.001031446043
11.06.2020	20:59:41.810	11.09.2020	10:35:59	3DD.003D7A9E1B	989.001031446043
11.06.2020	20:59:41.990	11.09.2020	10:35:59	3DD.003D7A9E1B	989.001031446043
11.06.2020	20:59:42.100	11.09.2020	10:35:59	3DD.003D7A9E1B	989.001031446043
11.06.2020	20:59:42.190	11.09.2020	10:35:59	3DD.003D7A9E1B	989.001031446043
11.06.2020	20:59:42.290	11.09.2020	10:35:59	3DD.003D7A9E1B	989.001031446043
11.06.2020	20:59:42.420	11.09.2020	10:35:59	3DD.003D7A9E1B	989.001031446043
11.06.2020	20:59:42.570	11.09.2020	10:35:59	3DD.003D7A9E1B	989.001031446043
11.06.2020	20:59:42.630	11.09.2020	10:35:59	3DD.003D7A9E1B	989.001031446043
11.06.2020	20:59:42.660	11.09.2020	10:35:59	3DD.003D7A9E1B	989.001031446043
11.06.2020	20:59:42.750	11.09.2020	10:35:59	3DD.003D7A9E1B	989.001031446043
11.06.2020	20:59:42.850	11.09.2020	10:35:59	3DD.003D7A9E1B	989.001031446043
11.06.2020	20:59:42.980	11.09.2020	10:35:59	3DD.003D7A9E1B	989.001031446043
11.06.2020	20:59:43.050	11.09.2020	10:35:59	3DD.003D7A9E1B	989.001031446043
11.06.2020	20:59:43.160	11.09.2020	10:35:59	3DD.003D7A9E1B	989.001031446043
11.06.2020	20:59:43.300	11.09.2020	10:35:59	3DD.003D7A9E1B	989.001031446043
11.06.2020	20:59:43.370	11.09.2020	10:35:59	3DD.003D7A9E1B	989.001031446043
11.06.2020	20:59:43.500	11.09.2020	10:35:59	3DD.003D7A9E1B	989.001031446043
11.06.2020	20:59:43.620	11.09.2020	10:35:59	3DD.003D7A9E1B	989.001031446043
11.06.2020	20:59:43.730	11.09.2020	10:35:59	3DD.003D7A9E1B	989.001031446043
11.06.2020	20:59:43.840	11.09.2020	10:35:59	3DD.003D7A9E1B	989.001031446043
11.06.2020	20:59:43.940	11.09.2020	10:35:59	3DD.003D7A9E1B	989.001031446043
11.06.2020	20:59:44.070	11.09.2020	10:35:59	3DD.003D7A9E1B	989.001031446043
11.06.2020	20:59:44.140	11.09.2020	10:35:59	3DD.003D7A9E1B	989.001031446043
11.06.2020	20:59:44.290	11.09.2020	10:35:59	3DD.003D7A9E1B	989.001031446043
11.06.2020	20:59:44.410	11.09.2020	10:35:59	3DD.003D7A9E1B	989.001031446043
11.06.2020	20:59:44.730	11.09.2020	10:35:59	3DD.003D7A9E1B	989.001031446043
11.06.2020	20:59:44.850	11.09.2020	10:35:59	3DD.003D7A9E1B	989.001031446043
11.06.2020	20:59:44.960	11.09.2020	10:35:59	3DD.003D7A9E1B	989.001031446043
11.06.2020	20:59:45.060	11.09.2020	10:35:59	3DD.003D7A9E1B	989.001031446043
11.06.2020	20:59:45.160	11.09.2020	10:35:59	3DD.003D7A9E1B	989.001031446043
11.06.2020	20:59:45.280	11.09.2020	10:35:59	3DD.003D7A9E1B	989.001031446043
11.06.2020	20:59:45.380	11.09.2020	10:35:59	3DD.003D7A9E1B	989.001031446043
11.06.2020	20:59:45.470	11.09.2020	10:35:59	3DD.003D7A9E1B	989.001031446043
11.06.2020	20:59:45.610	11.09.2020	10:35:59	3DD.003D7A9E1B	989.001031446043
11.06.2020	20:59:45.710	11.09.2020	10:35:59	3DD.003D7A9E1B	989.001031446043
11.06.2020	20:59:45.810	11.09.2020	10:35:59	3DD.003D7A9E1B	989.001031446043
11.06.2020	20:59:45.910	11.09.2020	10:35:59	3DD.003D7A9E1B	989.001031446043
11.06.2020	20:59:46.030	11.09.2020	10:35:59	3DD.003D7A9E1B	989.001031446043
11.06.2020	20:59:46.180	11.09.2020	10:35:59	3DD.003D7A9E1B	989.001031446043
11.06.2020	20:59:46.280	11.09.2020	10:35:59	3DD.003D7A9E1B	989.001031446043
11.06.2020	20:59:46.370	11.09.2020	10:35:59	3DD.003D7A9E1B	989.001031446043
11.06.2020	20:59:46.530	11.09.2020	10:35:59	3DD.003D7A9E1B	989.001031446043
11.06.2020	20:59:46.670	11.09.2020	10:35:59	3DD.003D7A9E1B	989.001031446043
11.06.2020	20:59:46.740	11.09.2020	10:35:59	3DD.003D7A9E1B	989.001031446043
11.06.2020	20:59:46.770	11.09.2020	10:35:59	3DD.003D7A9E1B	989.001031446043
11.06.2020	20:59:46.870	11.09.2020	10:35:59	3DD.003D7A9E1B	989.001031446043
11.06.2020	20:59:47.010	11.09.2020	10:35:59	3DD.003D7A9E1B	989.001031446043
11.06.2020	20:59:47.100	11.09.2020	10:35:59	3DD.003D7A9E1B	989.001031446043
11.06.2020	20:59:47.270	11.09.2020	10:35:59	3DD.003D7A9E1B	989.001031446043
11.06.2020	20:59:47.340	11.09.2020	10:35:59	3DD.003D7A9E1B	989.001031446043
11.06.2020	20:59:47.470	11.09.2020	10:35:59	3DD.003D7A9E1B	989.001031446043
11.06.2020	20:59:47.810	11.09.2020	10:35:59	3DD.003D7A9E1B	989.001031446043
11.06.2020	20:59:47.880	11.09.2020	10:35:59	3DD.003D7A9E1B	989.001031446043
11.06.2020	20:59:48.190	11.09.2020	10:35:59	3DD.003D7A9E1B	989.001031446043
11.06.2020	20:59:48.300	11.09.2020	10:36:00	3DD.003D7A9E1B	989.001031446043
11.06.2020	20:59:48.470	11.09.2020	10:36:00	3DD.003D7A9E1B	989.001031446043
11.06.2020	20:59:48.530	11.09.2020	10:36:00	3DD.003D7A9E1B	989.001031446043
11.06.2020	20:59:48.660	11.09.2020	10:36:00	3DD.003D7A9E1B	989.001031446043
11.06.2020	20:59:48.770	11.09.2020	10:36:00	3DD.003D7A9E1B	989.001031446043
11.06.2020	20:59:48.900	11.09.2020	10:36:00	3DD.003D7A9E1B	989.001031446043
11.06.2020	20:59:48.990	11.09.2020	10:36:00	3DD.003D7A9E1B	989.001031446043
11.06.2020	20:59:49.140	11.09.2020	10:36:00	3DD.003D7A9E1B	989.001031446043
11.06.2020	20:59:49.310	11.09.2020	10:36:00	3DD.003D7A9E1B	989.001031446043
11.06.2020	20:59:49.400	11.09.2020	10:36:00	3DD.003D7A9E1B	989.001031446043
11.06.2020	20:59:49.510	11.09.2020	10:36:00	3DD.003D7A9E1B	989.001031446043
11.06.2020	20:59:49.660	11.09.2020	10:36:00	3DD.003D7A9E1B	989.001031446043
11.06.2020	20:59:49.730	11.09.2020	10:36:00	3DD.003D7A9E1B	989.001031446043
11.06.2020	20:59:49.760	11.09.2020	10:36:00	3DD.003D7A9E1B	989.001031446043
11.06.2020	20:59:49.900	11.09.2020	10:36:00	3DD.003D7A9E1B	989.001031446043
11.06.2020	20:59:50.020	11.09.2020	10:36:00	3DD.003D7A9E1B	989.001031446043
11.06.2020	20:59:50.120	11.09.2020	10:36:00	3DD.003D7A9E1B	989.001031446043
11.06.2020	20:59:50.240	11.09.2020	10:36:00	3DD.003D7A9E1B	989.001031446043
11.06.2020	20:59:50.320	11.09.2020	10:36:00	3DD.003D7A9E1B	989.001031446043
11.06.2020	20:59:50.440	11.09.2020	10:36:00	3DD.003D7A9E1B	989.001031446043
11.06.2020	20:59:50.530	11.09.2020	10:36:00	3DD.003D7A9E1B	989.001031446043
11.06.2020	20:59:50.630	11.09.2020	10:36:00	3DD.003D7A9E1B	989.001031446043
11.06.2020	20:59:50.920	11.09.2020	10:36:00	3DD.003D7A9E1B	989.001031446043
11.06.2020	20:59:51.050	11.09.2020	10:36:00	3DD.003D7A9E1B	989.001031446043
11.06.2020	20:59:51.110	11.09.2020	10:36:00	3DD.003D7A9E1B	989.001031446043
11.06.2020	20:59:51.460	11.09.2020	10:36:00	3DD.003D7A9E1B	989.001031446043
11.06.2020	20:59:51.530	11.09.2020	10:36:00	3DD.003D7A9E1B	989.001031446043
11.06.2020	20:59:51.650	11.09.2020	10:36:00	3DD.003D7A9E1B	989.001031446043
11.06.2020	20:59:51.720	11.09.2020	10:36:00	3DD.003D7A9E1B	989.001031446043
11.06.2020	20:59:51.880	11.09.2020	10:36:00	3DD.003D7A9E1B	989.001031446043
11.06.2020	20:59:52.010	11.09.2020	10:36:00	3DD.003D7A9E1B	989.001031446043
11.06.2020	20:59:52.140	11.09.2020	10:36:00	3DD.003D7A9E1B	989.001031446043
11.06.2020	20:59:52.240	11.09.2020	10:36:00	3DD.003D7A9E1B	989.001031446043
11.06.2020	20:59:52.330	11.09.2020	10:36:00	3DD.003D7A9E1B	989.001031446043
11.06.2020	20:59:52.430	11.09.2020	10:36:00	3DD.003D7A9E1B	989.001031446043
11.06.2020	20:59:52.570	11.09.2020	10:36:00	3DD.003D7A9E1B	989.001031446043
11.06.2020	20:59:52.670	11.09.2020	10:36:00	3DD.003D7A9E1B	989.001031446043
11.06.2020	20:59:52.820	11.09.2020	10:36:00	3DD.003D7A9E1B	989.001031446043
11.06.2020	20:59:52.960	11.09.2020	10:36:00	3DD.003D7A9E1B	989.001031446043
11.06.2020	20:59:53.050	11.09.2020	10:36:00	3DD.003D7A9E1B	989.001031446043
11.06.2020	20:59:53.220	11.09.2020	10:36:00	3DD.003D7A9E1B	989.001031446043
11.06.2020	20:59:53.290	11.09.2020	10:36:00	3DD.003D7A9E1B	989.001031446043
11.06.2020	20:59:53.320	11.09.2020	10:36:00	3DD.003D7A9E1B	989.001031446043
11.06.2020	20:59:53.390	11.09.2020	10:36:00	3DD.003D7A9E1B	989.001031446043
11.06.2020	20:59:53.530	11.09.2020	10:36:00	3DD.003D7A9E1B	989.001031446043
11.06.2020	20:59:53.800	11.09.2020	10:36:00	3DD.003D7A9E1B	989.001031446043
11.06.2020	20:59:54.060	11.09.2020	10:36:00	3DD.003D7A9E1B	989.001031446043
11.06.2020	20:59:54.160	11.09.2020	10:36:00	3DD.003D7A9E1B	989.001031446043
11.06.2020	20:59:54.470	11.09.2020	10:36:00	3DD.003D7A9E1B	989.001031446043
11.06.2020	20:59:54.620	11.09.2020	10:36:00	3DD.003D7A9E1B	989.001031446043
11.06.2020	20:59:54.690	11.09.2020	10:36:00	3DD.003D7A9E1B	989.001031446043
11.06.2020	20:59:54.930	11.09.2020	10:36:00	3DD.003D7A9E1B	989.001031446043
11.06.2020	20:59:55.000	11.09.2020	10:36:00	3DD.003D7A9E1B	989.001031446043
11.06.2020	20:59:55.030	11.09.2020	10:36:00	3DD.003D7A9E1B	989.001031446043
11.06.2020	20:59:55.100	11.09.2020	10:36:00	3DD.003D7A9E1B	989.001031446043
11.06.2020	20:59:55.770	11.09.2020	10:36:00	3DD.003D7A9E1B	989.001031446043
11.06.2020	20:59:55.840	11.09.2020	10:36:00	3DD.003D7A9E1B	989.001031446043
11.06.2020	20:59:56.000	11.09.2020	10:36:00	3DD.003D7A9E1B	989.001031446043
11.06.2020	20:59:56.070	11.09.2020	10:36:00	3DD.003D7A9E1B	989.001031446043
11.06.2020	20:59:56.210	11.09.2020	10:36:00	3DD.003D7A9E1B	989.001031446043
11.06.2020	20:59:56.340	11.09.2020	10:36:00	3DD.003D7A9E1B	989.001031446043
11.06.2020	20:59:56.440	11.09.2020	10:36:00	3DD.003D7A9E1B	989.001031446043
11.06.2020	20:59:56.550	11.09.2020	10:36:00	3DD.003D7A9E1B	989.001031446043
11.06.2020	20:59:56.650	11.09.2020	10:36:00	3DD.003D7A9E1B	989.001031446043
11.06.2020	20:59:56.680	11.09.2020	10:36:00	3DD.003D7A9E1B	989.001031446043
11.06.2020	20:59:56.770	11.09.2020	10:36:00	3DD.003D7A9E1B	989.001031446043
11.06.2020	20:59:56.870	11.09.2020	10:36:00	3DD.003D7A9E1B	989.001031446043
11.06.2020	20:59:56.930	11.09.2020	10:36:00	3DD.003D7A9E1B	989.001031446043
11.06.2020	20:59:57.050	11.09.2020	10:36:01	3DD.003D7A9E1B	989.001031446043
11.06.2020	20:59:57.130	11.09.2020	10:36:01	3DD.003D7A9E1B	989.001031446043
11.06.2020	20:59:57.160	11.09.2020	10:36:01	3DD.003D7A9E1B	989.001031446043
11.06.2020	20:59:57.220	11.09.2020	10:36:01	3DD.003D7A9E1B	989.001031446043
11.06.2020	20:59:57.250	11.09.2020	10:36:01	3DD.003D7A9E1B	989.001031446043
11.06.2020	20:59:57.320	11.09.2020	10:36:01	3DD.003D7A9E1B	989.001031446043
11.06.2020	20:59:57.350	11.09.2020	10:36:01	3DD.003D7A9E1B	989.001031446043
11.06.2020	20:59:57.420	11.09.2020	10:36:01	3DD.003D7A9E1B	989.001031446043
11.06.2020	20:59:57.580	11.09.2020	10:36:01	3DD.003D7A9E1B	989.001031446043
11.06.2020	20:59:57.650	11.09.2020	10:36:01	3DD.003D7A9E1B	989.001031446043
11.06.2020	20:59:57.680	11.09.2020	10:36:01	3DD.003D7A9E1B	989.001031446043
11.06.2020	20:59:57.810	11.09.2020	10:36:01	3DD.003D7A9E1B	989.001031446043
11.06.2020	20:59:57.970	11.09.2020	10:36:01	3DD.003D7A9E1B	989.001031446043
11.06.2020	20:59:58.070	11.09.2020	10:36:01	3DD.003D7A9E1B	989.001031446043
11.06.2020	20:59:58.170	11.09.2020	10:36:01	3DD.003D7A9E1B	989.001031446043
11.06.2020	20:59:58.270	11.09.2020	10:36:01	3DD.003D7A9E1B	989.001031446043
11.06.2020	20:59:58.370	11.09.2020	10:36:01	3DD.003D7A9E1B	989.001031446043
11.06.2020	20:59:58.460	11.09.2020	10:36:01	3DD.003D7A9E1B	989.001031446043
11.06.2020	20:59:58.570	11.09.2020	10:36:01	3DD.003D7A9E1B	989.001031446043
11.06.2020	20:59:58.670	11.09.2020	10:36:01	3DD.003D7A9E1B	989.001031446043
11.06.2020	20:59:58.740	11.09.2020	10:36:01	3DD.003D7A9E1B	989.001031446043
11.06.2020	20:59:58.780	11.09.2020	10:36:01	3DD.003D7A9E1B	989.001031446043
11.06.2020	20:59:58.870	11.09.2020	10:36:01	3DD.003D7A9E1B	989.001031446043
11.06.2020	20:59:58.960	11.09.2020	10:36:01	3DD.003D7A9E1B	989.001031446043
11.06.2020	20:59:59.070	11.09.2020	10:36:01	3DD.003D7A9E1B	989.001031446043
11.06.2020	20:59:59.160	11.09.2020	10:36:01	3DD.003D7A9E1B	989.001031446043
11.06.2020	20:59:59.310	11.09.2020	10:36:01	3DD.003D7A9E1B	989.001031446043
11.06.2020	20:59:59.390	11.09.2020	10:36:01	3DD.003D7A9E1B	989.001031446043
11.06.2020	20:59:59.520	11.09.2020	10:36:01	3DD.003D7A9E1B	989.001031446043
11.06.2020	20:59:59.610	11.09.2020	10:36:01	3DD.003D7A9E1B	989.001031446043
11.06.2020	20:59:59.760	11.09.2020	10:36:01	3DD.003D7A9E1B	989.001031446043
11.06.2020	20:59:59.870	11.09.2020	10:36:01	3DD.003D7A9E1B	989.001031446043
11.06.2020	21:00:00.080	11.09.2020	10:36:01	3DD.003D7A9E1B	989.001031446043
11.06.2020	21:00:00.150	11.09.2020	10:36:01	3DD.003D7A9E1B	989.001031446043
11.06.2020	21:00:00.350	11.09.2020	10:36:01	3DD.003D7A9E1B	989.001031446043
11.06.2020	21:00:00.450	11.09.2020	10:36:01	3DD.003D7A9E1B	989.001031446043
11.06.2020	21:00:00.600	11.09.2020	10:36:01	3DD.003D7A9E1B	989.001031446043
11.06.2020	21:00:00.750	11.09.2020	10:36:01	3DD.003D7A9E1B	989.001031446043
11.06.2020	21:00:00.820	11.09.2020	10:36:01	3DD.003D7A9E1B	989.001031446043
11.06.2020	21:00:01.450	11.09.2020	10:36:01	3DD.003D7A9E1B	989.001031446043
11.06.2020	21:00:01.530	11.09.2020	10:36:01	3DD.003D7A9E1B	989.001031446043
11.06.2020	21:00:01.560	11.09.2020	10:36:01	3DD.003D7A9E1B	989.001031446043
11.06.2020	21:00:01.660	11.09.2020	10:36:01	3DD.003D7A9E1B	989.001031446043
11.06.2020	21:00:01.750	11.09.2020	10:36:01	3DD.003D7A9E1B	989.001031446043
11.06.2020	21:00:01.850	11.09.2020	10:36:01	3DD.003D7A9E1B	989.001031446043
11.06.2020	21:00:02.030	11.09.2020	10:36:01	3DD.003D7A9E1B	989.001031446043
11.06.2020	21:00:02.090	11.09.2020	10:36:01	3DD.003D7A9E1B	989.001031446043
11.06.2020	21:00:02.210	11.09.2020	10:36:01	3DD.003D7A9E1B	989.001031446043
11.06.2020	21:00:02.350	11.09.2020	10:36:01	3DD.003D7A9E1B	989.001031446043
11.06.2020	21:00:02.420	11.09.2020	10:36:01	3DD.003D7A9E1B	989.001031446043
11.06.2020	21:00:02.450	11.09.2020	10:36:01	3DD.003D7A9E1B	989.001031446043
11.06.2020	21:00:02.620	11.09.2020	10:36:01	3DD.003D7A9E1B	989.001031446043
11.06.2020	21:00:02.780	11.09.2020	10:36:01	3DD.003D7A9E1B	989.001031446043
11.06.2020	21:00:02.920	11.09.2020	10:36:01	3DD.003D7A9E1B	989.001031446043
11.06.2020	21:00:03.070	11.09.2020	10:36:01	3DD.003D7A9E1B	989.001031446043
11.06.2020	21:00:03.130	11.09.2020	10:36:01	3DD.003D7A9E1B	989.001031446043
11.06.2020	21:00:03.170	11.09.2020	10:36:01	3DD.003D7A9E1B	989.001031446043
11.06.2020	21:00:03.270	11.09.2020	10:36:01	3DD.003D7A9E1B	989.001031446043
11.06.2020	21:00:03.340	11.09.2020	10:36:01	3DD.003D7A9E1B	989.001031446043
11.06.2020	21:00:03.370	11.09.2020	10:36:01	3DD.003D7A9E1B	989.001031446043
11.06.2020	21:00:03.440	11.09.2020	10:36:01	3DD.003D7A9E1B	989.001031446043
11.06.2020	21:00:03.570	11.09.2020	10:36:01	3DD.003D7A9E1B	989.001031446043
11.06.2020	21:00:03.870	11.09.2020	10:36:01	3DD.003D7A9E1B	989.001031446043
11.06.2020	21:00:04.000	11.09.2020	10:36:01	3DD.003D7A9E1B	989.001031446043
11.06.2020	21:00:04.090	11.09.2020	10:36:01	3DD.003D7A9E1B	989.001031446043
11.06.2020	21:00:04.270	11.09.2020	10:36:01	3DD.003D7A9E1B	989.001031446043
11.06.2020	21:00:04.400	11.09.2020	10:36:02	3DD.003D7A9E1B	989.001031446043
11.06.2020	21:00:04.480	11.09.2020	10:36:02	3DD.003D7A9E1B	989.001031446043
11.06.2020	21:00:04.510	11.09.2020	10:36:02	3DD.003D7A9E1B	989.001031446043
11.06.2020	21:00:04.600	11.09.2020	10:36:02	3DD.003D7A9E1B	989.001031446043
11.06.2020	21:00:04.750	11.09.2020	10:36:02	3DD.003D7A9E1B	989.001031446043
11.06.2020	21:00:04.890	11.09.2020	10:36:02	3DD.003D7A9E1B	989.001031446043
11.06.2020	21:00:05.030	11.09.2020	10:36:02	3DD.003D7A9E1B	989.001031446043
11.06.2020	21:00:05.160	11.09.2020	10:36:02	3DD.003D7A9E1B	989.001031446043
11.06.2020	21:00:05.330	11.09.2020	10:36:02	3DD.003D7A9E1B	989.001031446043
11.06.2020	21:00:05.440	11.09.2020	10:36:02	3DD.003D7A9E1B	989.001031446043
11.06.2020	21:00:05.570	11.09.2020	10:36:02	3DD.003D7A9E1B	989.001031446043
11.06.2020	21:00:05.710	11.09.2020	10:36:02	3DD.003D7A9E1B	989.001031446043
11.06.2020	21:00:05.780	11.09.2020	10:36:02	3DD.003D7A9E1B	989.001031446043
11.06.2020	21:00:05.900	11.09.2020	10:36:02	3DD.003D7A9E1B	989.001031446043
11.06.2020	21:00:06.010	11.09.2020	10:36:02	3DD.003D7A9E1B	989.001031446043
11.06.2020	21:00:06.130	11.09.2020	10:36:02	3DD.003D7A9E1B	989.001031446043
11.06.2020	21:00:06.240	11.09.2020	10:36:02	3DD.003D7A9E1B	989.001031446043
11.06.2020	21:00:06.320	11.09.2020	10:36:02	3DD.003D7A9E1B	989.001031446043
11.06.2020	21:00:06.460	11.09.2020	10:36:02	3DD.003D7A9E1B	989.001031446043
11.06.2020	21:00:06.570	11.09.2020	10:36:02	3DD.003D7A9E1B	989.001031446043
11.06.2020	21:00:06.670	11.09.2020	10:36:02	3DD.003D7A9E1B	989.001031446043
11.06.2020	21:00:06.760	11.09.2020	10:36:02	3DD.003D7A9E1B	989.001031446043
11.06.2020	21:00:06.890	11.09.2020	10:36:02	3DD.003D7A9E1B	989.001031446043
11.06.2020	21:00:07.050	11.09.2020	10:36:02	3DD.003D7A9E1B	989.001031446043
11.06.2020	21:00:07.160	11.09.2020	10:36:02	3DD.003D7A9E1B	989.001031446043
11.06.2020	21:00:07.250	11.09.2020	10:36:02	3DD.003D7A9E1B	989.001031446043
11.06.2020	21:00:07.350	11.09.2020	10:36:02	3DD.003D7A9E1B	989.001031446043
11.06.2020	21:00:07.450	11.09.2020	10:36:02	3DD.003D7A9E1B	989.001031446043
11.06.2020	21:00:07.790	11.09.2020	10:36:02	3DD.003D7A9E1B	989.001031446043
11.06.2020	21:00:07.870	11.09.2020	10:36:02	3DD.003D7A9E1B	989.001031446043
11.06.2020	21:00:07.900	11.09.2020	10:36:02	3DD.003D7A9E1B	989.001031446043
11.06.2020	21:00:07.960	11.09.2020	10:36:02	3DD.003D7A9E1B	989.001031446043
11.06.2020	21:00:07.990	11.09.2020	10:36:02	3DD.003D7A9E1B	989.001031446043
11.06.2020	21:00:08.090	11.09.2020	10:36:02	3DD.003D7A9E1B	989.001031446043
11.06.2020	21:00:08.250	11.09.2020	10:36:02	3DD.003D7A9E1B	989.001031446043
11.06.2020	21:00:08.360	11.09.2020	10:36:02	3DD.003D7A9E1B	989.001031446043
11.06.2020	21:00:08.500	11.09.2020	10:36:02	3DD.003D7A9E1B	989.001031446043
11.06.2020	21:00:08.570	11.09.2020	10:36:02	3DD.003D7A9E1B	989.001031446043
11.06.2020	21:00:08.610	11.09.2020	10:36:02	3DD.003D7A9E1B	989.001031446043
11.06.2020	21:00:08.690	11.09.2020	10:36:02	3DD.003D7A9E1B	989.001031446043
11.06.2020	21:00:08.760	11.09.2020	10:36:02	3DD.003D7A9E1B	989.001031446043
11.06.2020	21:00:08.800	11.09.2020	10:36:02	3DD.003D7A9E1B	989.001031446043
11.06.2020	21:00:08.910	11.09.2020	10:36:02	3DD.003D7A9E1B	989.001031446043
11.06.2020	21:00:09.080	11.09.2020	10:36:02	3DD.003D7A9E1B	989.001031446043
11.06.2020	21:00:09.180	11.09.2020	10:36:02	3DD.003D7A9E1B	989.001031446043
11.06.2020	21:00:09.300	11.09.2020	10:36:02	3DD.003D7A9E1B	989.001031446043
11.06.2020	21:00:09.390	11.09.2020	10:36:02	3DD.003D7A9E1B	989.001031446043
11.06.2020	21:00:09.490	11.09.2020	10:36:02	3DD.003D7A9E1B	989.001031446043
11.06.2020	21:00:09.600	11.09.2020	10:36:02	3DD.003D7A9E1B	989.001031446043
11.06.2020	21:00:09.690	11.09.2020	10:36:02	3DD.003D7A9E1B	989.001031446043
11.06.2020	21:00:09.790	11.09.2020	10:36:02	3DD.003D7A9E1B	989.001031446043
11.06.2020	21:00:09.890	11.09.2020	10:36:02	3DD.003D7A9E1B	989.001031446043
11.06.2020	21:00:09.990	11.09.2020	10:36:02	3DD.003D7A9E1B	989.001031446043
11.06.2020	21:00:10.090	11.09.2020	10:36:02	3DD.003D7A9E1B	989.001031446043
11.06.2020	21:00:10.220	11.09.2020	10:36:02	3DD.003D7A9E1B	989.001031446043
11.06.2020	21:00:10.320	11.09.2020	10:36:02	3DD.003D7A9E1B	989.001031446043
11.06.2020	21:00:10.430	11.09.2020	10:36:02	3DD.003D7A9E1B	989.001031446043
11.06.2020	21:00:10.520	11.09.2020	10:36:02	3DD.003D7A9E1B	989.001031446043
11.06.2020	21:00:10.670	11.09.2020	10:36:02	3DD.003D7A9E1B	989.001031446043
11.06.2020	21:00:10.740	11.09.2020	10:36:02	3DD.003D7A9E1B	989.001031446043
11.06.2020	21:00:10.920	11.09.2020	10:36:02	3DD.003D7A9E1B	989.001031446043
11.06.2020	21:00:10.990	11.09.2020	10:36:02	3DD.003D7A9E1B	989.001031446043
11.06.2020	21:00:11.120	11.09.2020	10:36:02	3DD.003D7A9E1B	989.001031446043
11.06.2020	21:00:11.210	11.09.2020	10:36:02	3DD.003D7A9E1B	989.001031446043
11.06.2020	21:00:11.320	11.09.2020	10:36:02	3DD.003D7A9E1B	989.001031446043
11.06.2020	21:00:11.420	11.09.2020	10:36:02	3DD.003D7A9E1B	989.001031446043
11.06.2020	21:00:11.580	11.09.2020	10:36:02	3DD.003D7A9E1B	989.001031446043
11.06.2020	21:00:11.640	11.09.2020	10:36:03	3DD.003D7A9E1B	989.001031446043
11.06.2020	21:00:11.780	11.09.2020	10:36:03	3DD.003D7A9E1B	989.001031446043
11.06.2020	21:00:11.880	11.09.2020	10:36:03	3DD.003D7A9E1B	989.001031446043
11.06.2020	21:00:11.990	11.09.2020	10:36:03	3DD.003D7A9E1B	989.001031446043
11.06.2020	21:00:12.080	11.09.2020	10:36:03	3DD.003D7A9E1B	989.001031446043
11.06.2020	21:00:12.190	11.09.2020	10:36:03	3DD.003D7A9E1B	989.001031446043
11.06.2020	21:00:12.290	11.09.2020	10:36:03	3DD.003D7A9E1B	989.001031446043
11.06.2020	21:00:12.390	11.09.2020	10:36:03	3DD.003D7A9E1B	989.001031446043
11.06.2020	21:00:12.490	11.09.2020	10:36:03	3DD.003D7A9E1B	989.001031446043
11.06.2020	21:00:12.590	11.09.2020	10:36:03	3DD.003D7A9E1B	989.001031446043
11.06.2020	21:00:12.710	11.09.2020	10:36:03	3DD.003D7A9E1B	989.001031446043
11.06.2020	21:00:12.810	11.09.2020	10:36:03	3DD.003D7A9E1B	989.001031446043
11.06.2020	21:00:12.910	11.09.2020	10:36:03	3DD.003D7A9E1B	989.001031446043
11.06.2020	21:00:13.040	11.09.2020	10:36:03	3DD.003D7A9E1B	989.001031446043
11.06.2020	21:00:13.100	11.09.2020	10:36:03	3DD.003D7A9E1B	989.001031446043
11.06.2020	21:00:13.130	11.09.2020	10:36:03	3DD.003D7A9E1B	989.001031446043
11.06.2020	21:00:13.230	11.09.2020	10:36:03	3DD.003D7A9E1B	989.001031446043
11.06.2020	21:00:13.350	11.09.2020	10:36:03	3DD.003D7A9E1B	989.001031446043
11.06.2020	21:00:13.450	11.09.2020	10:36:03	3DD.003D7A9E1B	989.001031446043
11.06.2020	21:00:13.550	11.09.2020	10:36:03	3DD.003D7A9E1B	989.001031446043
11.06.2020	21:00:13.650	11.09.2020	10:36:03	3DD.003D7A9E1B	989.001031446043
11.06.2020	21:00:13.750	11.09.2020	10:36:03	3DD.003D7A9E1B	989.001031446043
11.06.2020	21:00:13.850	11.09.2020	10:36:03	3DD.003D7A9E1B	989.001031446043
11.06.2020	21:00:13.950	11.09.2020	10:36:03	3DD.003D7A9E1B	989.001031446043
11.06.2020	21:00:14.050	11.09.2020	10:36:03	3DD.003D7A9E1B	989.001031446043
11.06.2020	21:00:14.170	11.09.2020	10:36:03	3DD.003D7A9E1B	989.001031446043
11.06.2020	21:00:14.290	11.09.2020	10:36:03	3DD.003D7A9E1B	989.001031446043
11.06.2020	21:00:14.360	11.09.2020	10:36:03	3DD.003D7A9E1B	989.001031446043
11.06.2020	21:00:14.390	11.09.2020	10:36:03	3DD.003D7A9E1B	989.001031446043
11.06.2020	21:00:14.490	11.09.2020	10:36:03	3DD.003D7A9E1B	989.001031446043
11.06.2020	21:00:14.610	11.09.2020	10:36:03	3DD.003D7A9E1B	989.001031446043
11.06.2020	21:00:14.710	11.09.2020	10:36:03	3DD.003D7A9E1B	989.001031446043
11.06.2020	21:00:14.810	11.09.2020	10:36:03	3DD.003D7A9E1B	989.001031446043
11.06.2020	21:00:14.910	11.09.2020	10:36:03	3DD.003D7A9E1B	989.001031446043
11.06.2020	21:00:15.010	11.09.2020	10:36:03	3DD.003D7A9E1B	989.001031446043
11.06.2020	21:00:15.080	11.09.2020	10:36:03	3DD.003D7A9E1B	989.001031446043
11.06.2020	21:00:15.200	11.09.2020	10:36:03	3DD.003D7A9E1B	989.001031446043
11.06.2020	21:00:15.300	11.09.2020	10:36:03	3DD.003D7A9E1B	989.001031446043
11.06.2020	21:00:15.400	11.09.2020	10:36:03	3DD.003D7A9E1B	989.001031446043
11.06.2020	21:00:15.500	11.09.2020	10:36:03	3DD.003D7A9E1B	989.001031446043
11.06.2020	21:00:15.600	11.09.2020	10:36:03	3DD.003D7A9E1B	989.001031446043
11.06.2020	21:00:15.730	11.09.2020	10:36:03	3DD.003D7A9E1B	989.001031446043
11.06.2020	21:00:15.800	11.09.2020	10:36:03	3DD.003D7A9E1B	989.001031446043
11.06.2020	21:00:15.830	11.09.2020	10:36:03	3DD.003D7A9E1B	989.001031446043
11.06.2020	21:00:15.920	11.09.2020	10:36:03	3DD.003D7A9E1B	989.001031446043
11.06.2020	21:00:16.020	11.09.2020	10:36:03	3DD.003D7A9E1B	989.001031446043
11.06.2020	21:00:16.160	11.09.2020	10:36:03	3DD.003D7A9E1B	989.001031446043
11.06.2020	21:00:16.240	11.09.2020	10:36:03	3DD.003D7A9E1B	989.001031446043
11.06.2020	21:00:16.270	11.09.2020	10:36:03	3DD.003D7A9E1B	989.001031446043
11.06.2020	21:00:16.360	11.09.2020	10:36:03	3DD.003D7A9E1B	989.001031446043
11.06.2020	21:00:16.470	11.09.2020	10:36:03	3DD.003D7A9E1B	989.001031446043
11.06.2020	21:00:16.570	11.09.2020	10:36:03	3DD.003D7A9E1B	989.001031446043
11.06.2020	21:00:16.670	11.09.2020	10:36:03	3DD.003D7A9E1B	989.001031446043
11.06.2020	21:00:16.770	11.09.2020	10:36:03	3DD.003D7A9E1B	989.001031446043
11.06.2020	21:00:16.870	11.09.2020	10:36:03	3DD.003D7A9E1B	989.001031446043
11.06.2020	21:00:16.970	11.09.2020	10:36:03	3DD.003D7A9E1B	989.001031446043
11.06.2020	21:00:17.070	11.09.2020	10:36:03	3DD.003D7A9E1B	989.001031446043
11.06.2020	21:00:17.170	11.09.2020	10:36:03	3DD.003D7A9E1B	989.001031446043
11.06.2020	21:00:17.320	11.09.2020	10:36:03	3DD.003D7A9E1B	989.001031446043
11.06.2020	21:00:17.420	11.09.2020	10:36:03	3DD.003D7A9E1B	989.001031446043
11.06.2020	21:00:17.510	11.09.2020	10:36:03	3DD.003D7A9E1B	989.001031446043
11.06.2020	21:00:17.670	11.09.2020	10:36:03	3DD.003D7A9E1B	989.001031446043
11.06.2020	21:00:17.790	11.09.2020	10:36:03	3DD.003D7A9E1B	989.001031446043
11.06.2020	21:00:17.950	11.09.2020	10:36:03	3DD.003D7A9E1B	989.001031446043
11.06.2020	21:00:18.050	11.09.2020	10:36:03	3DD.003D7A9E1B	989.001031446043
11.06.2020	21:00:18.080	11.09.2020	10:36:03	3DD.003D7A9E1B	989.001031446043
11.06.2020	21:00:18.190	11.09.2020	10:36:03	3DD.003D7A9E1B	989.001031446043
11.06.2020	21:00:18.290	11.09.2020	10:36:03	3DD.003D7A9E1B	989.001031446043
11.06.2020	21:00:18.390	11.09.2020	10:36:04	3DD.003D7A9E1B	989.001031446043
11.06.2020	21:00:18.490	11.09.2020	10:36:04	3DD.003D7A9E1B	989.001031446043
11.06.2020	21:00:18.590	11.09.2020	10:36:04	3DD.003D7A9E1B	989.001031446043
11.06.2020	21:00:18.690	11.09.2020	10:36:04	3DD.003D7A9E1B	989.001031446043
11.06.2020	21:00:18.860	11.09.2020	10:36:04	3DD.003D7A9E1B	989.001031446043
11.06.2020	21:00:18.920	11.09.2020	10:36:04	3DD.003D7A9E1B	989.001031446043
11.06.2020	21:00:18.950	11.09.2020	10:36:04	3DD.003D7A9E1B	989.001031446043
11.06.2020	21:00:19.020	11.09.2020	10:36:04	3DD.003D7A9E1B	989.001031446043
11.06.2020	21:00:19.140	11.09.2020	10:36:04	3DD.003D7A9E1B	989.001031446043
11.06.2020	21:00:19.260	11.09.2020	10:36:04	3DD.003D7A9E1B	989.001031446043
11.06.2020	21:00:19.380	11.09.2020	10:36:04	3DD.003D7A9E1B	989.001031446043
11.06.2020	21:00:19.470	11.09.2020	10:36:04	3DD.003D7A9E1B	989.001031446043
11.06.2020	21:00:19.570	11.09.2020	10:36:04	3DD.003D7A9E1B	989.001031446043
11.06.2020	21:00:19.670	11.09.2020	10:36:04	3DD.003D7A9E1B	989.001031446043
11.06.2020	21:00:19.770	11.09.2020	10:36:04	3DD.003D7A9E1B	989.001031446043
11.06.2020	21:00:19.870	11.09.2020	10:36:04	3DD.003D7A9E1B	989.001031446043
11.06.2020	21:00:19.960	11.09.2020	10:36:04	3DD.003D7A9E1B	989.001031446043
11.06.2020	21:00:20.060	11.09.2020	10:36:04	3DD.003D7A9E1B	989.001031446043
11.06.2020	21:00:20.160	11.09.2020	10:36:04	3DD.003D7A9E1B	989.001031446043
11.06.2020	21:00:20.260	11.09.2020	10:36:04	3DD.003D7A9E1B	989.001031446043
11.06.2020	21:00:20.360	11.09.2020	10:36:04	3DD.003D7A9E1B	989.001031446043
11.06.2020	21:00:20.460	11.09.2020	10:36:04	3DD.003D7A9E1B	989.001031446043
11.06.2020	21:00:20.560	11.09.2020	10:36:04	3DD.003D7A9E1B	989.001031446043
11.06.2020	21:00:20.660	11.09.2020	10:36:04	3DD.003D7A9E1B	989.001031446043
11.06.2020	21:00:20.760	11.09.2020	10:36:04	3DD.003D7A9E1B	989.001031446043
11.06.2020	21:00:20.860	11.09.2020	10:36:04	3DD.003D7A9E1B	989.001031446043
11.06.2020	21:00:20.960	11.09.2020	10:36:04	3DD.003D7A9E1B	989.001031446043
11.06.2020	21:00:21.070	11.09.2020	10:36:04	3DD.003D7A9E1B	989.001031446043
11.06.2020	21:00:21.170	11.09.2020	10:36:04	3DD.003D7A9E1B	989.001031446043
11.06.2020	21:00:21.270	11.09.2020	10:36:04	3DD.003D7A9E1B	989.001031446043
11.06.2020	21:00:21.410	11.09.2020	10:36:04	3DD.003D7A9E1B	989.001031446043
11.06.2020	21:00:21.490	11.09.2020	10:36:04	3DD.003D7A9E1B	989.001031446043
11.06.2020	21:00:21.610	11.09.2020	10:36:04	3DD.003D7A9E1B	989.001031446043
11.06.2020	21:00:21.710	11.09.2020	10:36:04	3DD.003D7A9E1B	989.001031446043
11.06.2020	21:00:21.810	11.09.2020	10:36:04	3DD.003D7A9E1B	989.001031446043
11.06.2020	21:00:21.910	11.09.2020	10:36:04	3DD.003D7A9E1B	989.001031446043
11.06.2020	21:00:22.040	11.09.2020	10:36:04	3DD.003D7A9E1B	989.001031446043
11.06.2020	21:00:22.100	11.09.2020	10:36:04	3DD.003D7A9E1B	989.001031446043
11.06.2020	21:00:22.130	11.09.2020	10:36:04	3DD.003D7A9E1B	989.001031446043
11.06.2020	21:00:22.230	11.09.2020	10:36:04	3DD.003D7A9E1B	989.001031446043
11.06.2020	21:00:22.330	11.09.2020	10:36:04	3DD.003D7A9E1B	989.001031446043
11.06.2020	21:00:22.450	11.09.2020	10:36:04	3DD.003D7A9E1B	989.001031446043
11.06.2020	21:00:22.710	11.09.2020	10:36:04	3DD.003D7A9E1B	989.001031446043
11.06.2020	21:00:22.810	11.09.2020	10:36:04	3DD.003D7A9E1B	989.001031446043
11.06.2020	21:00:22.950	11.09.2020	10:36:04	3DD.003D7A9E1B	989.001031446043
11.06.2020	21:00:23.050	11.09.2020	10:36:04	3DD.003D7A9E1B	989.001031446043
11.06.2020	21:00:23.150	11.09.2020	10:36:04	3DD.003D7A9E1B	989.001031446043
11.06.2020	21:00:23.250	11.09.2020	10:36:04	3DD.003D7A9E1B	989.001031446043
11.06.2020	21:00:23.350	11.09.2020	10:36:04	3DD.003D7A9E1B	989.001031446043
11.06.2020	21:00:23.450	11.09.2020	10:36:04	3DD.003D7A9E1B	989.001031446043
11.06.2020	21:00:23.570	11.09.2020	10:36:04	3DD.003D7A9E1B	989.001031446043
11.06.2020	21:00:23.670	11.09.2020	10:36:04	3DD.003D7A9E1B	989.001031446043
11.06.2020	21:00:23.810	11.09.2020	10:36:04	3DD.003D7A9E1B	989.001031446043
11.06.2020	21:00:23.880	11.09.2020	10:36:04	3DD.003D7A9E1B	989.001031446043
11.06.2020	21:00:24.000	11.09.2020	10:36:04	3DD.003D7A9E1B	989.001031446043
11.06.2020	21:00:24.110	11.09.2020	10:36:04	3DD.003D7A9E1B	989.001031446043
11.06.2020	21:00:24.210	11.09.2020	10:36:04	3DD.003D7A9E1B	989.001031446043
11.06.2020	21:00:24.310	11.09.2020	10:36:04	3DD.003D7A9E1B	989.001031446043
11.06.2020	21:00:24.430	11.09.2020	10:36:04	3DD.003D7A9E1B	989.001031446043
11.06.2020	21:00:24.530	11.09.2020	10:36:04	3DD.003D7A9E1B	989.001031446043
11.06.2020	21:00:24.630	11.09.2020	10:36:04	3DD.003D7A9E1B	989.001031446043
11.06.2020	21:00:24.740	11.09.2020	10:36:04	3DD.003D7A9E1B	989.001031446043
11.06.2020	21:00:24.840	11.09.2020	10:36:04	3DD.003D7A9E1B	989.001031446043
11.06.2020	21:00:24.940	11.09.2020	10:36:04	3DD.003D7A9E1B	989.001031446043
11.06.2020	21:00:25.040	11.09.2020	10:36:04	3DD.003D7A9E1B	989.001031446043
11.06.2020	21:00:25.180	11.09.2020	10:36:04	3DD.003D7A9E1B	989.001031446043
11.06.2020	21:00:25.270	11.09.2020	10:36:04	3DD.003D7A9E1B	989.001031446043
11.06.2020	21:00:25.370	11.09.2020	10:36:04	3DD.003D7A9E1B	989.001031446043
11.06.2020	21:00:25.470	11.09.2020	10:36:05	3DD.003D7A9E1B	989.001031446043
11.06.2020	21:00:25.580	11.09.2020	10:36:05	3DD.003D7A9E1B	989.001031446043
11.06.2020	21:00:25.690	11.09.2020	10:36:05	3DD.003D7A9E1B	989.001031446043
11.06.2020	21:00:25.830	11.09.2020	10:36:05	3DD.003D7A9E1B	989.001031446043
11.06.2020	21:00:25.910	11.09.2020	10:36:05	3DD.003D7A9E1B	989.001031446043
11.06.2020	21:00:26.050	11.09.2020	10:36:05	3DD.003D7A9E1B	989.001031446043
11.06.2020	21:00:26.120	11.09.2020	10:36:05	3DD.003D7A9E1B	989.001031446043
11.06.2020	21:00:26.250	11.09.2020	10:36:05	3DD.003D7A9E1B	989.001031446043
11.06.2020	21:00:26.390	11.09.2020	10:36:05	3DD.003D7A9E1B	989.001031446043
11.06.2020	21:00:26.460	11.09.2020	10:36:05	3DD.003D7A9E1B	989.001031446043
11.06.2020	21:00:26.490	11.09.2020	10:36:05	3DD.003D7A9E1B	989.001031446043
11.06.2020	21:00:26.630	11.09.2020	10:36:05	3DD.003D7A9E1B	989.001031446043
11.06.2020	21:00:26.720	11.09.2020	10:36:05	3DD.003D7A9E1B	989.001031446043
11.06.2020	21:00:26.820	11.09.2020	10:36:05	3DD.003D7A9E1B	989.001031446043
11.06.2020	21:00:26.920	11.09.2020	10:36:05	3DD.003D7A9E1B	989.001031446043
11.06.2020	21:00:27.020	11.09.2020	10:36:05	3DD.003D7A9E1B	989.001031446043
11.06.2020	21:00:27.120	11.09.2020	10:36:05	3DD.003D7A9E1B	989.001031446043
11.06.2020	21:00:27.220	11.09.2020	10:36:05	3DD.003D7A9E1B	989.001031446043
11.06.2020	21:00:27.320	11.09.2020	10:36:05	3DD.003D7A9E1B	989.001031446043
11.06.2020	21:00:27.430	11.09.2020	10:36:05	3DD.003D7A9E1B	989.001031446043
11.06.2020	21:00:27.530	11.09.2020	10:36:05	3DD.003D7A9E1B	989.001031446043
11.06.2020	21:00:27.630	11.09.2020	10:36:05	3DD.003D7A9E1B	989.001031446043
11.06.2020	21:00:27.730	11.09.2020	10:36:05	3DD.003D7A9E1B	989.001031446043
11.06.2020	21:00:27.830	11.09.2020	10:36:05	3DD.003D7A9E1B	989.001031446043
11.06.2020	21:00:27.930	11.09.2020	10:36:05	3DD.003D7A9E1B	989.001031446043
11.06.2020	21:00:28.030	11.09.2020	10:36:05	3DD.003D7A9E1B	989.001031446043
11.06.2020	21:00:28.130	11.09.2020	10:36:05	3DD.003D7A9E1B	989.001031446043
11.06.2020	21:00:28.230	11.09.2020	10:36:05	3DD.003D7A9E1B	989.001031446043
11.06.2020	21:00:28.330	11.09.2020	10:36:05	3DD.003D7A9E1B	989.001031446043
11.06.2020	21:00:28.430	11.09.2020	10:36:05	3DD.003D7A9E1B	989.001031446043
11.06.2020	21:00:28.530	11.09.2020	10:36:05	3DD.003D7A9E1B	989.001031446043
11.06.2020	21:00:28.670	11.09.2020	10:36:05	3DD.003D7A9E1B	989.001031446043
11.06.2020	21:00:28.820	11.09.2020	10:36:05	3DD.003D7A9E1B	989.001031446043
11.06.2020	21:00:28.960	11.09.2020	10:36:05	3DD.003D7A9E1B	989.001031446043
11.06.2020	21:00:29.040	11.09.2020	10:36:05	3DD.003D7A9E1B	989.001031446043
11.06.2020	21:00:29.140	11.09.2020	10:36:05	3DD.003D7A9E1B	989.001031446043
11.06.2020	21:00:29.250	11.09.2020	10:36:05	3DD.003D7A9E1B	989.001031446043
11.06.2020	21:00:29.350	11.09.2020	10:36:05	3DD.003D7A9E1B	989.001031446043
11.06.2020	21:00:29.440	11.09.2020	10:36:05	3DD.003D7A9E1B	989.001031446043
11.06.2020	21:00:29.590	11.09.2020	10:36:05	3DD.003D7A9E1B	989.001031446043
11.06.2020	21:00:29.660	11.09.2020	10:36:05	3DD.003D7A9E1B	989.001031446043
11.06.2020	21:00:29.780	11.09.2020	10:36:05	3DD.003D7A9E1B	989.001031446043
11.06.2020	21:00:29.910	11.09.2020	10:36:05	3DD.003D7A9E1B	989.001031446043
11.06.2020	21:00:29.980	11.09.2020	10:36:05	3DD.003D7A9E1B	989.001031446043
11.06.2020	21:00:30.140	11.09.2020	10:36:05	3DD.003D7A9E1B	989.001031446043
11.06.2020	21:00:30.240	11.09.2020	10:36:05	3DD.003D7A9E1B	989.001031446043
11.06.2020	21:00:30.390	11.09.2020	10:36:05	3DD.003D7A9E1B	989.001031446043
11.06.2020	21:00:30.470	11.09.2020	10:36:05	3DD.003D7A9E1B	989.001031446043
11.06.2020	21:00:30.500	11.09.2020	10:36:05	3DD.003D7A9E1B	989.001031446043
11.06.2020	21:00:30.590	11.09.2020	10:36:05	3DD.003D7A9E1B	989.001031446043
11.06.2020	21:00:30.690	11.09.2020	10:36:05	3DD.003D7A9E1B	989.001031446043
11.06.2020	21:00:30.780	11.09.2020	10:36:05	3DD.003D7A9E1B	989.001031446043
11.06.2020	21:00:30.910	11.09.2020	10:36:05	3DD.003D7A9E1B	989.001031446043
11.06.2020	21:00:31.020	11.09.2020	10:36:05	3DD.003D7A9E1B	989.001031446043
11.06.2020	21:00:31.110	11.09.2020	10:36:05	3DD.003D7A9E1B	989.001031446043
11.06.2020	21:00:31.210	11.09.2020	10:36:05	3DD.003D7A9E1B	989.001031446043
11.06.2020	21:00:31.310	11.09.2020	10:36:05	3DD.003D7A9E1B	989.001031446043
11.06.2020	21:00:31.480	11.09.2020	10:36:05	3DD.003D7A9E1B	989.001031446043
11.06.2020	21:00:31.580	11.09.2020	10:36:05	3DD.003D7A9E1B	989.001031446043
11.06.2020	21:00:31.690	11.09.2020	10:36:05	3DD.003D7A9E1B	989.001031446043
11.06.2020	21:00:31.780	11.09.2020	10:36:05	3DD.003D7A9E1B	989.001031446043
11.06.2020	21:00:31.940	11.09.2020	10:36:05	3DD.003D7A9E1B	989.001031446043
11.06.2020	21:00:32.000	11.09.2020	10:36:05	3DD.003D7A9E1B	989.001031446043
11.06.2020	21:00:32.300	11.09.2020	10:36:05	3DD.003D7A9E1B	989.001031446043
11.06.2020	21:00:32.570	11.09.2020	10:36:05	3DD.003D7A9E1B	989.001031446043
11.06.2020	21:00:32.700	11.09.2020	10:36:05	3DD.003D7A9E1B	989.001031446043
11.06.2020	21:00:32.800	11.09.2020	10:36:05	3DD.003D7A9E1B	989.001031446043
11.06.2020	21:00:32.920	11.09.2020	10:36:06	3DD.003D7A9E1B	989.001031446043
11.06.2020	21:00:32.990	11.09.2020	10:36:06	3DD.003D7A9E1B	989.001031446043
11.06.2020	21:00:33.140	11.09.2020	10:36:06	3DD.003D7A9E1B	989.001031446043
11.06.2020	21:00:33.200	11.09.2020	10:36:06	3DD.003D7A9E1B	989.001031446043
11.06.2020	21:00:33.240	11.09.2020	10:36:06	3DD.003D7A9E1B	989.001031446043
11.06.2020	21:00:33.340	11.09.2020	10:36:06	3DD.003D7A9E1B	989.001031446043
11.06.2020	21:00:33.490	11.09.2020	10:36:06	3DD.003D7A9E1B	989.001031446043
11.06.2020	21:00:33.580	11.09.2020	10:36:06	3DD.003D7A9E1B	989.001031446043
11.06.2020	21:00:33.700	11.09.2020	10:36:06	3DD.003D7A9E1B	989.001031446043
11.06.2020	21:00:33.810	11.09.2020	10:36:06	3DD.003D7A9E1B	989.001031446043
11.06.2020	21:00:33.940	11.09.2020	10:36:06	3DD.003D7A9E1B	989.001031446043
11.06.2020	21:00:34.040	11.09.2020	10:36:06	3DD.003D7A9E1B	989.001031446043
11.06.2020	21:00:34.160	11.09.2020	10:36:06	3DD.003D7A9E1B	989.001031446043
11.06.2020	21:00:34.250	11.09.2020	10:36:06	3DD.003D7A9E1B	989.001031446043
11.06.2020	21:00:34.360	11.09.2020	10:36:06	3DD.003D7A9E1B	989.001031446043
11.06.2020	21:00:34.460	11.09.2020	10:36:06	3DD.003D7A9E1B	989.001031446043
11.06.2020	21:00:34.570	11.09.2020	10:36:06	3DD.003D7A9E1B	989.001031446043
11.06.2020	21:00:34.700	11.09.2020	10:36:06	3DD.003D7A9E1B	989.001031446043
11.06.2020	21:00:34.800	11.09.2020	10:36:06	3DD.003D7A9E1B	989.001031446043
11.06.2020	21:00:34.970	11.09.2020	10:36:06	3DD.003D7A9E1B	989.001031446043
11.06.2020	21:00:35.060	11.09.2020	10:36:06	3DD.003D7A9E1B	989.001031446043
11.06.2020	21:00:35.170	11.09.2020	10:36:06	3DD.003D7A9E1B	989.001031446043
11.06.2020	21:00:35.260	11.09.2020	10:36:06	3DD.003D7A9E1B	989.001031446043
11.06.2020	21:00:35.360	11.09.2020	10:36:06	3DD.003D7A9E1B	989.001031446043
11.06.2020	21:00:35.460	11.09.2020	10:36:06	3DD.003D7A9E1B	989.001031446043
11.06.2020	21:00:35.560	11.09.2020	10:36:06	3DD.003D7A9E1B	989.001031446043
11.06.2020	21:00:35.660	11.09.2020	10:36:06	3DD.003D7A9E1B	989.001031446043
11.06.2020	21:00:35.760	11.09.2020	10:36:06	3DD.003D7A9E1B	989.001031446043
11.06.2020	21:00:35.910	11.09.2020	10:36:06	3DD.003D7A9E1B	989.001031446043
11.06.2020	21:00:35.980	11.09.2020	10:36:06	3DD.003D7A9E1B	989.001031446043
11.06.2020	21:00:36.140	11.09.2020	10:36:06	3DD.003D7A9E1B	989.001031446043
11.06.2020	21:00:36.230	11.09.2020	10:36:06	3DD.003D7A9E1B	989.001031446043
11.06.2020	21:00:36.380	11.09.2020	10:36:06	3DD.003D7A9E1B	989.001031446043
11.06.2020	21:00:36.680	11.09.2020	10:36:06	3DD.003D7A9E1B	989.001031446043
11.06.2020	21:00:36.780	11.09.2020	10:36:06	3DD.003D7A9E1B	989.001031446043
11.06.2020	21:00:36.890	11.09.2020	10:36:06	3DD.003D7A9E1B	989.001031446043
11.06.2020	21:00:37.410	11.09.2020	10:36:06	3DD.003D7A9E1B	989.001031446043
11.06.2020	21:00:37.480	11.09.2020	10:36:06	3DD.003D7A9E1B	989.001031446043
11.06.2020	21:00:37.510	11.09.2020	10:36:06	3DD.003D7A9E1B	989.001031446043
11.06.2020	21:00:37.600	11.09.2020	10:36:06	3DD.003D7A9E1B	989.001031446043
11.06.2020	21:00:37.700	11.09.2020	10:36:06	3DD.003D7A9E1B	989.001031446043
11.06.2020	21:00:37.800	11.09.2020	10:36:06	3DD.003D7A9E1B	989.001031446043
11.06.2020	21:00:37.900	11.09.2020	10:36:06	3DD.003D7A9E1B	989.001031446043
11.06.2020	21:00:38.000	11.09.2020	10:36:06	3DD.003D7A9E1B	989.001031446043
11.06.2020	21:00:38.100	11.09.2020	10:36:06	3DD.003D7A9E1B	989.001031446043
11.06.2020	21:00:38.200	11.09.2020	10:36:06	3DD.003D7A9E1B	989.001031446043
11.06.2020	21:00:38.320	11.09.2020	10:36:06	3DD.003D7A9E1B	989.001031446043
11.06.2020	21:00:38.470	11.09.2020	10:36:06	3DD.003D7A9E1B	989.001031446043
11.06.2020	21:00:38.570	11.09.2020	10:36:06	3DD.003D7A9E1B	989.001031446043
11.06.2020	21:00:38.710	11.09.2020	10:36:06	3DD.003D7A9E1B	989.001031446043
11.06.2020	21:00:38.840	11.09.2020	10:36:06	3DD.003D7A9E1B	989.001031446043
11.06.2020	21:00:38.900	11.09.2020	10:36:06	3DD.003D7A9E1B	989.001031446043
11.06.2020	21:00:39.020	11.09.2020	10:36:06	3DD.003D7A9E1B	989.001031446043
11.06.2020	21:00:39.190	11.09.2020	10:36:06	3DD.003D7A9E1B	989.001031446043
11.06.2020	21:00:39.260	11.09.2020	10:36:06	3DD.003D7A9E1B	989.001031446043
11.06.2020	21:00:39.430	11.09.2020	10:36:06	3DD.003D7A9E1B	989.001031446043
11.06.2020	21:00:39.500	11.09.2020	10:36:06	3DD.003D7A9E1B	989.001031446043
11.06.2020	21:00:39.650	11.09.2020	10:36:06	3DD.003D7A9E1B	989.001031446043
11.06.2020	21:00:39.720	11.09.2020	10:36:06	3DD.003D7A9E1B	989.001031446043
11.06.2020	21:00:39.850	11.09.2020	10:36:06	3DD.003D7A9E1B	989.001031446043
11.06.2020	21:00:39.950	11.09.2020	10:36:06	3DD.003D7A9E1B	989.001031446043
11.06.2020	21:00:40.010	11.09.2020	10:36:06	3DD.003D7A9E1B	989.001031446043
11.06.2020	21:00:40.050	11.09.2020	10:36:06	3DD.003D7A9E1B	989.001031446043
11.06.2020	21:00:40.120	11.09.2020	10:36:06	3DD.003D7A9E1B	989.001031446043
11.06.2020	21:00:40.240	11.09.2020	10:36:06	3DD.003D7A9E1B	989.001031446043
11.06.2020	21:00:40.370	11.09.2020	10:36:06	3DD.003D7A9E1B	989.001031446043
11.06.2020	21:00:40.490	11.09.2020	10:36:07	3DD.003D7A9E1B	989.001031446043
11.06.2020	21:00:40.600	11.09.2020	10:36:07	3DD.003D7A9E1B	989.001031446043
11.06.2020	21:00:40.690	11.09.2020	10:36:07	3DD.003D7A9E1B	989.001031446043
11.06.2020	21:00:40.840	11.09.2020	10:36:07	3DD.003D7A9E1B	989.001031446043
11.06.2020	21:00:40.910	11.09.2020	10:36:07	3DD.003D7A9E1B	989.001031446043
11.06.2020	21:00:41.040	11.09.2020	10:36:07	3DD.003D7A9E1B	989.001031446043
11.06.2020	21:00:41.130	11.09.2020	10:36:07	3DD.003D7A9E1B	989.001031446043
11.06.2020	21:00:41.340	11.09.2020	10:36:07	3DD.003D7A9E1B	989.001031446043
11.06.2020	21:00:41.450	11.09.2020	10:36:07	3DD.003D7A9E1B	989.001031446043
11.06.2020	21:00:41.570	11.09.2020	10:36:07	3DD.003D7A9E1B	989.001031446043
11.06.2020	21:00:41.690	11.09.2020	10:36:07	3DD.003D7A9E1B	989.001031446043
11.06.2020	21:00:41.800	11.09.2020	10:36:07	3DD.003D7A9E1B	989.001031446043
11.06.2020	21:00:41.900	11.09.2020	10:36:07	3DD.003D7A9E1B	989.001031446043
11.06.2020	21:00:42.050	11.09.2020	10:36:07	3DD.003D7A9E1B	989.001031446043
11.06.2020	21:00:42.140	11.09.2020	10:36:07	3DD.003D7A9E1B	989.001031446043
11.06.2020	21:00:42.220	11.09.2020	10:36:07	3DD.003D7A9E1B	989.001031446043
11.06.2020	21:00:42.370	11.09.2020	10:36:07	3DD.003D7A9E1B	989.001031446043
11.06.2020	21:00:42.470	11.09.2020	10:36:07	3DD.003D7A9E1B	989.001031446043
11.06.2020	21:00:42.610	11.09.2020	10:36:07	3DD.003D7A9E1B	989.001031446043
11.06.2020	21:00:42.680	11.09.2020	10:36:07	3DD.003D7A9E1B	989.001031446043
11.06.2020	21:00:42.800	11.09.2020	10:36:07	3DD.003D7A9E1B	989.001031446043
11.06.2020	21:00:42.900	11.09.2020	10:36:07	3DD.003D7A9E1B	989.001031446043
11.06.2020	21:00:43.010	11.09.2020	10:36:07	3DD.003D7A9E1B	989.001031446043
11.06.2020	21:00:43.120	11.09.2020	10:36:07	3DD.003D7A9E1B	989.001031446043
11.06.2020	21:00:43.240	11.09.2020	10:36:07	3DD.003D7A9E1B	989.001031446043
11.06.2020	21:00:43.340	11.09.2020	10:36:07	3DD.003D7A9E1B	989.001031446043
11.06.2020	21:00:43.460	11.09.2020	10:36:07	3DD.003D7A9E1B	989.001031446043
11.06.2020	21:00:43.550	11.09.2020	10:36:07	3DD.003D7A9E1B	989.001031446043
11.06.2020	21:00:43.720	11.09.2020	10:36:07	3DD.003D7A9E1B	989.001031446043
11.06.2020	21:00:43.820	11.09.2020	10:36:07	3DD.003D7A9E1B	989.001031446043
11.06.2020	21:00:43.920	11.09.2020	10:36:07	3DD.003D7A9E1B	989.001031446043
11.06.2020	21:00:44.020	11.09.2020	10:36:07	3DD.003D7A9E1B	989.001031446043
11.06.2020	21:00:44.110	11.09.2020	10:36:07	3DD.003D7A9E1B	989.001031446043
11.06.2020	21:00:44.210	11.09.2020	10:36:07	3DD.003D7A9E1B	989.001031446043
11.06.2020	21:00:44.320	11.09.2020	10:36:07	3DD.003D7A9E1B	989.001031446043
11.06.2020	21:00:44.490	11.09.2020	10:36:07	3DD.003D7A9E1B	989.001031446043
11.06.2020	21:00:44.570	11.09.2020	10:36:07	3DD.003D7A9E1B	989.001031446043
11.06.2020	21:00:44.750	11.09.2020	10:36:07	3DD.003D7A9E1B	989.001031446043
11.06.2020	21:00:44.820	11.09.2020	10:36:07	3DD.003D7A9E1B	989.001031446043
11.06.2020	21:00:44.970	11.09.2020	10:36:07	3DD.003D7A9E1B	989.001031446043
11.06.2020	21:00:45.030	11.09.2020	10:36:07	3DD.003D7A9E1B	989.001031446043
11.06.2020	21:00:45.160	11.09.2020	10:36:07	3DD.003D7A9E1B	989.001031446043
11.06.2020	21:00:45.260	11.09.2020	10:36:07	3DD.003D7A9E1B	989.001031446043
11.06.2020	21:00:45.360	11.09.2020	10:36:07	3DD.003D7A9E1B	989.001031446043
11.06.2020	21:00:45.450	11.09.2020	10:36:07	3DD.003D7A9E1B	989.001031446043
11.06.2020	21:00:45.550	11.09.2020	10:36:07	3DD.003D7A9E1B	989.001031446043
11.06.2020	21:00:45.660	11.09.2020	10:36:07	3DD.003D7A9E1B	989.001031446043
11.06.2020	21:00:45.750	11.09.2020	10:36:07	3DD.003D7A9E1B	989.001031446043
11.06.2020	21:00:45.860	11.09.2020	10:36:07	3DD.003D7A9E1B	989.001031446043
11.06.2020	21:00:45.980	11.09.2020	10:36:07	3DD.003D7A9E1B	989.001031446043
11.06.2020	21:00:46.070	11.09.2020	10:36:07	3DD.003D7A9E1B	989.001031446043
11.06.2020	21:00:46.180	11.09.2020	10:36:07	3DD.003D7A9E1B	989.001031446043
11.06.2020	21:00:46.290	11.09.2020	10:36:07	3DD.003D7A9E1B	989.001031446043
11.06.2020	21:00:46.410	11.09.2020	10:36:07	3DD.003D7A9E1B	989.001031446043
11.06.2020	21:00:46.700	11.09.2020	10:36:07	3DD.003D7A9E1B	989.001031446043
11.06.2020	21:00:46.790	11.09.2020	10:36:07	3DD.003D7A9E1B	989.001031446043
11.06.2020	21:00:46.900	11.09.2020	10:36:07	3DD.003D7A9E1B	989.001031446043
11.06.2020	21:00:47.000	11.09.2020	10:36:07	3DD.003D7A9E1B	989.001031446043
11.06.2020	21:00:47.090	11.09.2020	10:36:07	3DD.003D7A9E1B	989.001031446043
11.06.2020	21:00:47.200	11.09.2020	10:36:07	3DD.003D7A9E1B	989.001031446043
11.06.2020	21:00:47.510	11.09.2020	10:36:07	3DD.003D7A9E1B	989.001031446043
11.06.2020	21:00:47.610	11.09.2020	10:36:07	3DD.003D7A9E1B	989.001031446043
11.06.2020	21:00:47.740	11.09.2020	10:36:07	3DD.003D7A9E1B	989.001031446043
11.06.2020	21:00:47.870	11.09.2020	10:36:07	3DD.003D7A9E1B	989.001031446043
11.06.2020	21:00:48.000	11.09.2020	10:36:07	3DD.003D7A9E1B	989.001031446043
11.06.2020	21:00:48.140	11.09.2020	10:36:07	3DD.003D7A9E1B	989.001031446043
11.06.2020	21:00:48.250	11.09.2020	10:36:07	3DD.003D7A9E1B	989.001031446043
11.06.2020	21:00:48.330	11.09.2020	10:36:07	3DD.003D7A9E1B	989.001031446043
11.06.2020	21:00:48.350	11.09.2020	10:36:08	3DD.003D7A9E1B	989.001031446043
11.06.2020	21:00:48.510	11.09.2020	10:36:08	3DD.003D7A9E1B	989.001031446043
11.06.2020	21:00:48.650	11.09.2020	10:36:08	3DD.003D7A9E1B	989.001031446043
11.06.2020	21:00:48.710	11.09.2020	10:36:08	3DD.003D7A9E1B	989.001031446043
11.06.2020	21:00:48.740	11.09.2020	10:36:08	3DD.003D7A9E1B	989.001031446043
11.06.2020	21:00:48.870	11.09.2020	10:36:08	3DD.003D7A9E1B	989.001031446043
11.06.2020	21:00:48.970	11.09.2020	10:36:08	3DD.003D7A9E1B	989.001031446043
11.06.2020	21:00:49.070	11.09.2020	10:36:08	3DD.003D7A9E1B	989.001031446043
11.06.2020	21:00:49.190	11.09.2020	10:36:08	3DD.003D7A9E1B	989.001031446043
11.06.2020	21:00:49.330	11.09.2020	10:36:08	3DD.003D7A9E1B	989.001031446043
11.06.2020	21:00:49.430	11.09.2020	10:36:08	3DD.003D7A9E1B	989.001031446043
11.06.2020	21:00:49.530	11.09.2020	10:36:08	3DD.003D7A9E1B	989.001031446043
11.06.2020	21:00:49.630	11.09.2020	10:36:08	3DD.003D7A9E1B	989.001031446043
11.06.2020	21:00:49.730	11.09.2020	10:36:08	3DD.003D7A9E1B	989.001031446043
11.06.2020	21:00:49.860	11.09.2020	10:36:08	3DD.003D7A9E1B	989.001031446043
11.06.2020	21:00:49.940	11.09.2020	10:36:08	3DD.003D7A9E1B	989.001031446043
11.06.2020	21:00:50.060	11.09.2020	10:36:08	3DD.003D7A9E1B	989.001031446043
11.06.2020	21:00:50.160	11.09.2020	10:36:08	3DD.003D7A9E1B	989.001031446043
11.06.2020	21:00:50.260	11.09.2020	10:36:08	3DD.003D7A9E1B	989.001031446043
11.06.2020	21:00:50.360	11.09.2020	10:36:08	3DD.003D7A9E1B	989.001031446043
11.06.2020	21:00:50.490	11.09.2020	10:36:08	3DD.003D7A9E1B	989.001031446043
11.06.2020	21:00:50.590	11.09.2020	10:36:08	3DD.003D7A9E1B	989.001031446043
11.06.2020	21:00:50.730	11.09.2020	10:36:08	3DD.003D7A9E1B	989.001031446043
11.06.2020	21:00:50.890	11.09.2020	10:36:08	3DD.003D7A9E1B	989.001031446043
11.06.2020	21:00:50.950	11.09.2020	10:36:08	3DD.003D7A9E1B	989.001031446043
11.06.2020	21:00:51.120	11.09.2020	10:36:08	3DD.003D7A9E1B	989.001031446043
11.06.2020	21:00:51.190	11.09.2020	10:36:08	3DD.003D7A9E1B	989.001031446043
11.06.2020	21:00:51.220	11.09.2020	10:36:08	3DD.003D7A9E1B	989.001031446043
11.06.2020	21:00:51.330	11.09.2020	10:36:08	3DD.003D7A9E1B	989.001031446043
11.06.2020	21:00:51.420	11.09.2020	10:36:08	3DD.003D7A9E1B	989.001031446043
11.06.2020	21:00:51.530	11.09.2020	10:36:08	3DD.003D7A9E1B	989.001031446043
11.06.2020	21:00:51.600	11.09.2020	10:36:08	3DD.003D7A9E1B	989.001031446043
11.06.2020	21:00:51.630	11.09.2020	10:36:08	3DD.003D7A9E1B	989.001031446043
11.06.2020	21:00:51.690	11.09.2020	10:36:08	3DD.003D7A9E1B	989.001031446043
11.06.2020	21:00:51.810	11.09.2020	10:36:08	3DD.003D7A9E1B	989.001031446043
11.06.2020	21:00:51.910	11.09.2020	10:36:08	3DD.003D7A9E1B	989.001031446043
11.06.2020	21:00:52.010	11.09.2020	10:36:08	3DD.003D7A9E1B	989.001031446043
11.06.2020	21:00:52.080	11.09.2020	10:36:08	3DD.003D7A9E1B	989.001031446043
11.06.2020	21:00:52.110	11.09.2020	10:36:08	3DD.003D7A9E1B	989.001031446043
11.06.2020	21:00:52.200	11.09.2020	10:36:08	3DD.003D7A9E1B	989.001031446043
11.06.2020	21:00:52.300	11.09.2020	10:36:08	3DD.003D7A9E1B	989.001031446043
11.06.2020	21:00:52.430	11.09.2020	10:36:08	3DD.003D7A9E1B	989.001031446043
11.06.2020	21:00:52.500	11.09.2020	10:36:08	3DD.003D7A9E1B	989.001031446043
11.06.2020	21:00:52.660	11.09.2020	10:36:08	3DD.003D7A9E1B	989.001031446043
11.06.2020	21:00:52.770	11.09.2020	10:36:08	3DD.003D7A9E1B	989.001031446043
11.06.2020	21:00:52.890	11.09.2020	10:36:08	3DD.003D7A9E1B	989.001031446043
11.06.2020	21:00:53.020	11.09.2020	10:36:08	3DD.003D7A9E1B	989.001031446043
11.06.2020	21:00:53.080	11.09.2020	10:36:08	3DD.003D7A9E1B	989.001031446043
11.06.2020	21:00:53.110	11.09.2020	10:36:08	3DD.003D7A9E1B	989.001031446043
11.06.2020	21:00:53.210	11.09.2020	10:36:08	3DD.003D7A9E1B	989.001031446043
11.06.2020	21:00:53.300	11.09.2020	10:36:08	3DD.003D7A9E1B	989.001031446043
11.06.2020	21:00:53.410	11.09.2020	10:36:08	3DD.003D7A9E1B	989.001031446043
11.06.2020	21:00:53.510	11.09.2020	10:36:08	3DD.003D7A9E1B	989.001031446043
11.06.2020	21:00:53.650	11.09.2020	10:36:08	3DD.003D7A9E1B	989.001031446043
11.06.2020	21:00:53.740	11.09.2020	10:36:08	3DD.003D7A9E1B	989.001031446043
11.06.2020	21:00:53.880	11.09.2020	10:36:08	3DD.003D7A9E1B	989.001031446043
11.06.2020	21:00:53.990	11.09.2020	10:36:08	3DD.003D7A9E1B	989.001031446043
11.06.2020	21:00:54.160	11.09.2020	10:36:08	3DD.003D7A9E1B	989.001031446043
11.06.2020	21:00:54.230	11.09.2020	10:36:08	3DD.003D7A9E1B	989.001031446043
11.06.2020	21:00:54.360	11.09.2020	10:36:08	3DD.003D7A9E1B	989.001031446043
11.06.2020	21:00:54.460	11.09.2020	10:36:08	3DD.003D7A9E1B	989.001031446043
11.06.2020	21:00:54.560	11.09.2020	10:36:08	3DD.003D7A9E1B	989.001031446043
11.06.2020	21:00:54.650	11.09.2020	10:36:08	3DD.003D7A9E1B	989.001031446043
11.06.2020	21:00:54.750	11.09.2020	10:36:08	3DD.003D7A9E1B	989.001031446043
11.06.2020	21:00:54.890	11.09.2020	10:36:08	3DD.003D7A9E1B	989.001031446043
11.06.2020	21:00:55.040	11.09.2020	10:36:08	3DD.003D7A9E1B	989.001031446043
11.06.2020	21:00:55.110	11.09.2020	10:36:08	3DD.003D7A9E1B	989.001031446043
11.06.2020	21:00:55.140	11.09.2020	10:36:09	3DD.003D7A9E1B	989.001031446043
11.06.2020	21:00:55.210	11.09.2020	10:36:09	3DD.003D7A9E1B	989.001031446043
11.06.2020	21:00:55.590	11.09.2020	10:36:09	3DD.003D7A9E1B	989.001031446043
11.06.2020	21:00:55.660	11.09.2020	10:36:09	3DD.003D7A9E1B	989.001031446043
11.06.2020	21:00:55.690	11.09.2020	10:36:09	3DD.003D7A9E1B	989.001031446043
11.06.2020	21:00:55.840	11.09.2020	10:36:09	3DD.003D7A9E1B	989.001031446043
11.06.2020	21:00:55.990	11.09.2020	10:36:09	3DD.003D7A9E1B	989.001031446043
11.06.2020	21:00:56.090	11.09.2020	10:36:09	3DD.003D7A9E1B	989.001031446043
11.06.2020	21:00:56.190	11.09.2020	10:36:09	3DD.003D7A9E1B	989.001031446043
11.06.2020	21:00:56.350	11.09.2020	10:36:09	3DD.003D7A9E1B	989.001031446043
11.06.2020	21:00:56.480	11.09.2020	10:36:09	3DD.003D7A9E1B	989.001031446043
11.06.2020	21:00:56.600	11.09.2020	10:36:09	3DD.003D7A9E1B	989.001031446043
11.06.2020	21:00:56.700	11.09.2020	10:36:09	3DD.003D7A9E1B	989.001031446043
11.06.2020	21:00:56.790	11.09.2020	10:36:09	3DD.003D7A9E1B	989.001031446043
11.06.2020	21:00:57.060	11.09.2020	10:36:09	3DD.003D7A9E1B	989.001031446043
11.06.2020	21:00:57.130	11.09.2020	10:36:09	3DD.003D7A9E1B	989.001031446043
11.06.2020	21:00:57.260	11.09.2020	10:36:09	3DD.003D7A9E1B	989.001031446043
11.06.2020	21:00:57.330	11.09.2020	10:36:09	3DD.003D7A9E1B	989.001031446043
11.06.2020	21:00:57.460	11.09.2020	10:36:09	3DD.003D7A9E1B	989.001031446043
11.06.2020	21:00:57.570	11.09.2020	10:36:09	3DD.003D7A9E1B	989.001031446043
11.06.2020	21:00:57.720	11.09.2020	10:36:09	3DD.003D7A9E1B	989.001031446043
11.06.2020	21:00:57.790	11.09.2020	10:36:09	3DD.003D7A9E1B	989.001031446043
11.06.2020	21:00:57.950	11.09.2020	10:36:09	3DD.003D7A9E1B	989.001031446043
11.06.2020	21:00:58.020	11.09.2020	10:36:09	3DD.003D7A9E1B	989.001031446043
11.06.2020	21:00:58.050	11.09.2020	10:36:09	3DD.003D7A9E1B	989.001031446043
11.06.2020	21:00:58.140	11.09.2020	10:36:09	3DD.003D7A9E1B	989.001031446043
11.06.2020	21:00:58.220	11.09.2020	10:36:09	3DD.003D7A9E1B	989.001031446043
11.06.2020	21:00:58.310	11.09.2020	10:36:09	3DD.003D7A9E1B	989.001031446043
11.06.2020	21:00:58.340	11.09.2020	10:36:09	3DD.003D7A9E1B	989.001031446043
11.06.2020	21:00:58.450	11.09.2020	10:36:09	3DD.003D7A9E1B	989.001031446043
11.06.2020	21:00:58.480	11.09.2020	10:36:09	3DD.003D7A9E1B	989.001031446043
11.06.2020	21:00:58.580	11.09.2020	10:36:09	3DD.003D7A9E1B	989.001031446043
11.06.2020	21:00:58.720	11.09.2020	10:36:09	3DD.003D7A9E1B	989.001031446043
11.06.2020	21:00:58.790	11.09.2020	10:36:09	3DD.003D7A9E1B	989.001031446043
11.06.2020	21:00:58.820	11.09.2020	10:36:09	3DD.003D7A9E1B	989.001031446043
11.06.2020	21:00:58.920	11.09.2020	10:36:09	3DD.003D7A9E1B	989.001031446043
11.06.2020	21:00:59.040	11.09.2020	10:36:09	3DD.003D7A9E1B	989.001031446043
11.06.2020	21:00:59.130	11.09.2020	10:36:09	3DD.003D7A9E1B	989.001031446043
11.06.2020	21:00:59.280	11.09.2020	10:36:09	3DD.003D7A9E1B	989.001031446043
11.06.2020	21:00:59.390	11.09.2020	10:36:09	3DD.003D7A9E1B	989.001031446043
11.06.2020	21:00:59.490	11.09.2020	10:36:09	3DD.003D7A9E1B	989.001031446043
11.06.2020	21:00:59.620	11.09.2020	10:36:09	3DD.003D7A9E1B	989.001031446043
11.06.2020	21:00:59.740	11.09.2020	10:36:09	3DD.003D7A9E1B	989.001031446043
11.06.2020	21:01:00.010	11.09.2020	10:36:09	3DD.003D7A9E1B	989.001031446043
11.06.2020	21:01:00.100	11.09.2020	10:36:09	3DD.003D7A9E1B	989.001031446043
11.06.2020	21:01:00.270	11.09.2020	10:36:09	3DD.003D7A9E1B	989.001031446043
11.06.2020	21:01:00.370	11.09.2020	10:36:09	3DD.003D7A9E1B	989.001031446043
11.06.2020	21:01:00.470	11.09.2020	10:36:09	3DD.003D7A9E1B	989.001031446043
11.06.2020	21:01:00.570	11.09.2020	10:36:09	3DD.003D7A9E1B	989.001031446043
11.06.2020	21:01:00.680	11.09.2020	10:36:09	3DD.003D7A9E1B	989.001031446043
11.06.2020	21:01:00.800	11.09.2020	10:36:09	3DD.003D7A9E1B	989.001031446043
11.06.2020	21:01:00.890	11.09.2020	10:36:09	3DD.003D7A9E1B	989.001031446043
11.06.2020	21:01:00.990	11.09.2020	10:36:09	3DD.003D7A9E1B	989.001031446043
11.06.2020	21:01:01.110	11.09.2020	10:36:09	3DD.003D7A9E1B	989.001031446043
11.06.2020	21:01:01.250	11.09.2020	10:36:09	3DD.003D7A9E1B	989.001031446043
11.06.2020	21:01:01.320	11.09.2020	10:36:09	3DD.003D7A9E1B	989.001031446043
11.06.2020	21:01:01.350	11.09.2020	10:36:09	3DD.003D7A9E1B	989.001031446043
11.06.2020	21:01:01.440	11.09.2020	10:36:09	3DD.003D7A9E1B	989.001031446043
11.06.2020	21:01:01.540	11.09.2020	10:36:09	3DD.003D7A9E1B	989.001031446043
11.06.2020	21:01:01.640	11.09.2020	10:36:09	3DD.003D7A9E1B	989.001031446043
11.06.2020	21:01:01.750	11.09.2020	10:36:10	3DD.003D7A9E1B	989.001031446043
11.06.2020	21:01:01.880	11.09.2020	10:36:10	3DD.003D7A9E1B	989.001031446043
11.06.2020	21:01:01.980	11.09.2020	10:36:10	3DD.003D7A9E1B	989.001031446043
11.06.2020	21:01:02.080	11.09.2020	10:36:10	3DD.003D7A9E1B	989.001031446043
11.06.2020	21:01:02.200	11.09.2020	10:36:10	3DD.003D7A9E1B	989.001031446043
11.06.2020	21:01:02.300	11.09.2020	10:36:10	3DD.003D7A9E1B	989.001031446043
11.06.2020	21:01:02.420	11.09.2020	10:36:10	3DD.003D7A9E1B	989.001031446043
11.06.2020	21:01:02.530	11.09.2020	10:36:10	3DD.003D7A9E1B	989.001031446043
11.06.2020	21:01:02.640	11.09.2020	10:36:10	3DD.003D7A9E1B	989.001031446043
11.06.2020	21:01:02.740	11.09.2020	10:36:10	3DD.003D7A9E1B	989.001031446043
11.06.2020	21:01:02.800	11.09.2020	10:36:10	3DD.003D7A9E1B	989.001031446043
11.06.2020	21:01:02.840	11.09.2020	10:36:10	3DD.003D7A9E1B	989.001031446043
11.06.2020	21:01:02.930	11.09.2020	10:36:10	3DD.003D7A9E1B	989.001031446043
11.06.2020	21:01:03.230	11.09.2020	10:36:10	3DD.003D7A9E1B	989.001031446043
11.06.2020	21:01:03.340	11.09.2020	10:36:10	3DD.003D7A9E1B	989.001031446043
11.06.2020	21:01:03.640	11.09.2020	10:36:10	3DD.003D7A9E1B	989.001031446043
11.06.2020	21:01:03.700	11.09.2020	10:36:10	3DD.003D7A9E1B	989.001031446043
11.06.2020	21:01:03.900	11.09.2020	10:36:10	3DD.003D7A9E1B	989.001031446043
11.06.2020	21:01:03.990	11.09.2020	10:36:10	3DD.003D7A9E1B	989.001031446043
11.06.2020	21:01:04.160	11.09.2020	10:36:10	3DD.003D7A9E1B	989.001031446043
11.06.2020	21:01:04.270	11.09.2020	10:36:10	3DD.003D7A9E1B	989.001031446043
11.06.2020	21:01:04.340	11.09.2020	10:36:10	3DD.003D7A9E1B	989.001031446043
11.06.2020	21:01:04.430	11.09.2020	10:36:10	3DD.003D7A9E1B	989.001031446043
11.06.2020	21:01:04.550	11.09.2020	10:36:10	3DD.003D7A9E1B	989.001031446043
11.06.2020	21:01:04.640	11.09.2020	10:36:10	3DD.003D7A9E1B	989.001031446043
11.06.2020	21:01:04.750	11.09.2020	10:36:10	3DD.003D7A9E1B	989.001031446043
11.06.2020	21:01:04.880	11.09.2020	10:36:10	3DD.003D7A9E1B	989.001031446043
11.06.2020	21:01:05.020	11.09.2020	10:36:10	3DD.003D7A9E1B	989.001031446043
11.06.2020	21:01:05.090	11.09.2020	10:36:10	3DD.003D7A9E1B	989.001031446043
11.06.2020	21:01:05.210	11.09.2020	10:36:10	3DD.003D7A9E1B	989.001031446043
11.06.2020	21:01:05.300	11.09.2020	10:36:10	3DD.003D7A9E1B	989.001031446043
11.06.2020	21:01:05.440	11.09.2020	10:36:10	3DD.003D7A9E1B	989.001031446043
11.06.2020	21:01:05.530	11.09.2020	10:36:10	3DD.003D7A9E1B	989.001031446043
11.06.2020	21:01:05.560	11.09.2020	10:36:10	3DD.003D7A9E1B	989.001031446043
11.06.2020	21:01:05.670	11.09.2020	10:36:10	3DD.003D7A9E1B	989.001031446043
11.06.2020	21:01:05.700	11.09.2020	10:36:10	3DD.003D7A9E1B	989.001031446043
11.06.2020	21:01:05.800	11.09.2020	10:36:10	3DD.003D7A9E1B	989.001031446043
11.06.2020	21:01:05.920	11.09.2020	10:36:10	3DD.003D7A9E1B	989.001031446043
11.06.2020	21:01:06.060	11.09.2020	10:36:10	3DD.003D7A9E1B	989.001031446043
11.06.2020	21:01:06.130	11.09.2020	10:36:10	3DD.003D7A9E1B	989.001031446043
11.06.2020	21:01:06.160	11.09.2020	10:36:10	3DD.003D7A9E1B	989.001031446043
11.06.2020	21:01:06.250	11.09.2020	10:36:10	3DD.003D7A9E1B	989.001031446043
11.06.2020	21:01:06.350	11.09.2020	10:36:10	3DD.003D7A9E1B	989.001031446043
11.06.2020	21:01:06.460	11.09.2020	10:36:10	3DD.003D7A9E1B	989.001031446043
11.06.2020	21:01:06.560	11.09.2020	10:36:10	3DD.003D7A9E1B	989.001031446043
11.06.2020	21:01:06.650	11.09.2020	10:36:10	3DD.003D7A9E1B	989.001031446043
11.06.2020	21:01:06.780	11.09.2020	10:36:10	3DD.003D7A9E1B	989.001031446043
11.06.2020	21:01:06.850	11.09.2020	10:36:10	3DD.003D7A9E1B	989.001031446043
11.06.2020	21:01:06.880	11.09.2020	10:36:10	3DD.003D7A9E1B	989.001031446043
11.06.2020	21:01:06.980	11.09.2020	10:36:10	3DD.003D7A9E1B	989.001031446043
11.06.2020	21:01:07.110	11.09.2020	10:36:10	3DD.003D7A9E1B	989.001031446043
11.06.2020	21:01:07.200	11.09.2020	10:36:10	3DD.003D7A9E1B	989.001031446043
11.06.2020	21:01:07.300	11.09.2020	10:36:10	3DD.003D7A9E1B	989.001031446043
11.06.2020	21:01:07.430	11.09.2020	10:36:10	3DD.003D7A9E1B	989.001031446043
11.06.2020	21:01:07.510	11.09.2020	10:36:10	3DD.003D7A9E1B	989.001031446043
11.06.2020	21:01:07.630	11.09.2020	10:36:10	3DD.003D7A9E1B	989.001031446043
11.06.2020	21:01:07.730	11.09.2020	10:36:10	3DD.003D7A9E1B	989.001031446043
11.06.2020	21:01:07.830	11.09.2020	10:36:10	3DD.003D7A9E1B	989.001031446043
11.06.2020	21:01:07.970	11.09.2020	10:36:10	3DD.003D7A9E1B	989.001031446043
11.06.2020	21:01:08.070	11.09.2020	10:36:10	3DD.003D7A9E1B	989.001031446043
11.06.2020	21:01:08.170	11.09.2020	10:36:10	3DD.003D7A9E1B	989.001031446043
11.06.2020	21:01:08.270	11.09.2020	10:36:10	3DD.003D7A9E1B	989.001031446043
11.06.2020	21:01:08.370	11.09.2020	10:36:10	3DD.003D7A9E1B	989.001031446043
11.06.2020	21:01:08.470	11.09.2020	10:36:10	3DD.003D7A9E1B	989.001031446043
11.06.2020	21:01:08.570	11.09.2020	10:36:10	3DD.003D7A9E1B	989.001031446043
11.06.2020	21:01:08.670	11.09.2020	10:36:10	3DD.003D7A9E1B	989.001031446043
11.06.2020	21:01:08.780	11.09.2020	10:36:10	3DD.003D7A9E1B	989.001031446043
11.06.2020	21:01:09.140	11.09.2020	10:36:11	3DD.003D7A9E1B	989.001031446043
11.06.2020	21:01:09.270	11.09.2020	10:36:11	3DD.003D7A9E1B	989.001031446043
11.06.2020	21:01:09.360	11.09.2020	10:36:11	3DD.003D7A9E1B	989.001031446043
11.06.2020	21:01:09.460	11.09.2020	10:36:11	3DD.003D7A9E1B	989.001031446043
11.06.2020	21:01:09.560	11.09.2020	10:36:11	3DD.003D7A9E1B	989.001031446043
11.06.2020	21:01:09.660	11.09.2020	10:36:11	3DD.003D7A9E1B	989.001031446043
11.06.2020	21:01:09.760	11.09.2020	10:36:11	3DD.003D7A9E1B	989.001031446043
11.06.2020	21:01:09.860	11.09.2020	10:36:11	3DD.003D7A9E1B	989.001031446043
11.06.2020	21:01:09.960	11.09.2020	10:36:11	3DD.003D7A9E1B	989.001031446043
11.06.2020	21:01:10.060	11.09.2020	10:36:11	3DD.003D7A9E1B	989.001031446043
11.06.2020	21:01:10.170	11.09.2020	10:36:11	3DD.003D7A9E1B	989.001031446043
11.06.2020	21:01:10.260	11.09.2020	10:36:11	3DD.003D7A9E1B	989.001031446043
11.06.2020	21:01:10.360	11.09.2020	10:36:11	3DD.003D7A9E1B	989.001031446043
11.06.2020	21:01:10.460	11.09.2020	10:36:11	3DD.003D7A9E1B	989.001031446043
11.06.2020	21:01:10.560	11.09.2020	10:36:11	3DD.003D7A9E1B	989.001031446043
11.06.2020	21:01:10.690	11.09.2020	10:36:11	3DD.003D7A9E1B	989.001031446043
11.06.2020	21:01:10.790	11.09.2020	10:36:11	3DD.003D7A9E1B	989.001031446043
11.06.2020	21:01:10.890	11.09.2020	10:36:11	3DD.003D7A9E1B	989.001031446043
11.06.2020	21:01:11.040	11.09.2020	10:36:11	3DD.003D7A9E1B	989.001031446043
11.06.2020	21:01:11.140	11.09.2020	10:36:11	3DD.003D7A9E1B	989.001031446043
11.06.2020	21:01:11.270	11.09.2020	10:36:11	3DD.003D7A9E1B	989.001031446043
11.06.2020	21:01:11.430	11.09.2020	10:36:11	3DD.003D7A9E1B	989.001031446043
11.06.2020	21:01:11.590	11.09.2020	10:36:11	3DD.003D7A9E1B	989.001031446043
11.06.2020	21:01:11.710	11.09.2020	10:36:11	3DD.003D7A9E1B	989.001031446043
11.06.2020	21:01:11.810	11.09.2020	10:36:11	3DD.003D7A9E1B	989.001031446043
11.06.2020	21:01:11.930	11.09.2020	10:36:11	3DD.003D7A9E1B	989.001031446043
11.06.2020	21:01:12.080	11.09.2020	10:36:11	3DD.003D7A9E1B	989.001031446043
11.06.2020	21:01:12.150	11.09.2020	10:36:11	3DD.003D7A9E1B	989.001031446043
11.06.2020	21:01:12.180	11.09.2020	10:36:11	3DD.003D7A9E1B	989.001031446043
11.06.2020	21:01:12.490	11.09.2020	10:36:11	3DD.003D7A9E1B	989.001031446043
11.06.2020	21:01:12.650	11.09.2020	10:36:11	3DD.003D7A9E1B	989.001031446043
11.06.2020	21:01:12.740	11.09.2020	10:36:11	3DD.003D7A9E1B	989.001031446043
11.06.2020	21:01:12.850	11.09.2020	10:36:11	3DD.003D7A9E1B	989.001031446043
11.06.2020	21:01:12.990	11.09.2020	10:36:11	3DD.003D7A9E1B	989.001031446043
11.06.2020	21:01:13.140	11.09.2020	10:36:11	3DD.003D7A9E1B	989.001031446043
11.06.2020	21:01:13.210	11.09.2020	10:36:11	3DD.003D7A9E1B	989.001031446043
11.06.2020	21:01:13.930	11.09.2020	10:36:11	3DD.003D7A9E1B	989.001031446043
11.06.2020	21:01:14.080	11.09.2020	10:36:11	3DD.003D7A9E1B	989.001031446043
11.06.2020	21:01:14.190	11.09.2020	10:36:11	3DD.003D7A9E1B	989.001031446043
11.06.2020	21:01:14.320	11.09.2020	10:36:11	3DD.003D7A9E1B	989.001031446043
11.06.2020	21:01:14.440	11.09.2020	10:36:11	3DD.003D7A9E1B	989.001031446043
11.06.2020	21:01:14.560	11.09.2020	10:36:11	3DD.003D7A9E1B	989.001031446043
11.06.2020	21:01:14.680	11.09.2020	10:36:11	3DD.003D7A9E1B	989.001031446043
11.06.2020	21:01:14.750	11.09.2020	10:36:11	3DD.003D7A9E1B	989.001031446043
[truncated: 145,399 more rows]

## Sheet: filtered
Scan date	NFDD upstream	NFDD downstream	NFDD wild	Q(m³/s)		In this sheet you can find the filtered data. We put together all the individual hatchery fish detected in a day (NFDD), divided between fish released upstream and downstream the PIT tag antenna.
10.29.2020	0	4	0	1.49		You can find the data about wild fish marked in Laveggio Creek, starting from April 2021.
10.30.2020	5	4	0	1.24		You can also find the daily average discharge in Laveggio (Riva San Vitale, https://www.oasi.ti.ch/web/dati/idrologia.html).
10.31.2020	11	4	0	1.1
11.01.2020	0	2	0	1.01
11.02.2020	0	0	0	0.96
11.03.2020	0	0	0	0.9
11.04.2020	0	0	0	0.87
11.05.2020	1	0	0	0.84
11.06.2020	1	1	0	0.82
11.07.2020	2	1	0	0.78
11.08.2020	2	0	0	0.77
11.09.2020	2	0	0	0.77
11.10.2020	2	0	0	0.75
11.11.2020	0	0	0	0.73
11.12.2020	1	0	0	0.73
11.13.2020	1	0	0	0.71
11.14.2020	2	0	0	0.71
11.15.2020	1	0	0	0.7
11.16.2020	1	1	0	0.79
11.17.2020	0	0	0	0.69
11.18.2020	0	1	0	0.67
11.19.2020	0	0	0	0.66
11.20.2020	0	0	0	0.64
11.21.2020	0	1	0	0.62
11.22.2020	0	1	0	0.62
11.23.2020	0	0	0	0.62
11.24.2020	0	0	0	0.62
11.25.2020	0	0	0	0.61
11.26.2020	0	0	0	0.6
11.27.2020	0	0	0	0.6
11.28.2020	1	0	0	0.59
11.29.2020	1	0	0	0.58
11.30.2020	0	0	0	0.57
12.01.2020	0	0	0	0.61
12.02.2020	0	0	0	0.7
12.03.2020	0	0	0	0.55
12.04.2020	0	0	0	1.08
12.05.2020	0	0	0	2.64
12.06.2020	0	0	0	4.23
12.07.2020	0	0	0	3.29
12.08.2020	0	1	0	3.07
12.09.2020	2	2	0	2.9
12.10.2020	1	4	0	2.32
12.11.2020	0	3	0	1.89
12.12.2020	0	2	0	1.64
12.13.2020	0	2	0	1.45
12.14.2020	0	2	0	1.35
12.15.2020	0	0	0	1.29
12.16.2020	0	1	0	1.24
12.17.2020	0	1	0	1.25
12.18.2020	0	0	0	1.24
12.19.2020	0	0	0	1.19
12.20.2020	0	0	0	1.22
12.21.2020	0	1	0	1.17
12.22.2020	0	0	0	1.12
12.23.2020	1	2	0	1.05
12.24.2020	0	1	0	1.13
12.25.2020	0	0	0	0.99
12.26.2020	0	0	0	0.93
12.27.2020	0	0	0	0.9
12.28.2020	0	1	0	0.96
12.29.2020	0	0	0	0.96
12.30.2020	0	1	0	0.95
12.31.2020	0	4	0	0.83
01.01.2021	0	3	0	1.34
01.02.2021	0	3	0	2.61
01.03.2021	0	7	0	3.41
01.04.2021	1	2	0	2.64
01.05.2021	0	3	0	2.27
01.06.2021	0	1	0	2.09
01.07.2021	0	1	0	1.67
01.08.2021	0	3	0	1.52
01.09.2021	0	4	0	1.4
01.10.2021	0	1	0	1.3
01.11.2021	0	3	0	1.24
01.12.2021	0	2	0	1.18
01.13.2021	0	1	0	1.14
01.14.2021	0	1	0	1.11
01.15.2021	0	0	0	1.12
01.16.2021	0	6	0	1.08
01.17.2021	0	5	0	1.05
01.18.2021	0	1	0	1.02
01.19.2021	0	1	0	1
01.20.2021	0	0	0	1
01.21.2021	0	0	0	1.65
01.22.2021	0	3	0	3.07
01.23.2021	0	2	0	4.3
01.24.2021	0	0	0	2.56
01.25.2021	1	1	0	1.91
01.26.2021	0	0	0	1.6
01.27.2021	0	4	0	1.47
01.28.2021	0	1	0	1.38
01.29.2021	0	4	0	1.32
01.30.2021	0	2	0	1.32
01.31.2021	0	2	0	1.37
02.01.2021	0	4	0	1.32
02.02.2021	0	0	0	1.28
02.03.2021	0	0	0	1.3
02.04.2021	0	4	0	1.27
02.05.2021	0	1	0	1.35
02.06.2021	0	4	0	1.37
02.07.2021	0	2	0	4.94
02.08.2021	0	4	0	4.79
02.09.2021	0	3	0	3.12
02.10.2021	0	1	0	3.21
02.11.2021	0	0	0	2.45
02.12.2021	0	1	0	2.07
02.13.2021	0	1	0	1.83
02.14.2021	0	1	0	1.66
02.15.2021	0	0	0	1.56
02.16.2021	0	2	0	1.49
02.17.2021	0	0	0	1.44
02.18.2021	0	0	0	1.39
02.19.2021	0	0	0	1.33
02.20.2021	0	0	0	1.28
02.21.2021	0	3	0	1.25
02.22.2021	0	3	0	1.2
02.23.2021	0	1	0	1.18
02.24.2021	0	0	0	1.18
02.25.2021	0	0	0	1.17
02.26.2021	0	0	0	1.12
02.27.2021	0	2	0	1.12
02.28.2021	0	0	0	1.1
03.01.2021	0	0	0	1.1
03.02.2021	0	2	0	1.09
03.03.2021	0	2	0	1.07
03.04.2021	0	0	0	1.05
03.05.2021	0	0	0	1.06
03.06.2021	0	0	0	1.11
03.07.2021	0	2	0	1.03
03.08.2021	0	0	0	1.03
03.09.2021	0	0	0	1
03.10.2021	0	3	0	0.98
03.11.2021	0	0	0	0.94
03.12.2021	0	3	0	0.95
03.13.2021	0	0	0	1
03.14.2021	0	0	0	0.99
03.15.2021	0	1	0	0.9
03.16.2021	0	0	0	0.89
03.17.2021	0	0	0	0.87
03.18.2021	0	1	0	0.86
03.19.2021	0	2	0	0.95
03.20.2021	0	2	0	0.87
03.21.2021	0	0	0	0.88
03.22.2021	0	0	0	0.87
03.23.2021	0	0	0	0.88
03.24.2021	0	0	0	0.9
03.25.2021	0	0	0	0.91
03.26.2021	0	0	0	0.93
03.27.2021	0	1	0	0.9
03.28.2021	0	0	0	0.92
03.29.2021	0	2	0	0.95
03.30.2021	0	1	0	0.96
03.31.2021	0	1	0	0.95
04.01.2021	1	1	0	0.94
04.02.2021	0	1	0	0.93
04.03.2021	1	0	0	0.89
04.04.2021	1	0	0	0.86
04.05.2021	0	0	0	0.84
04.06.2021	0	0	0	0.8
04.07.2021	0	0	1	0.77
04.08.2021	0	1	0	0.74
04.09.2021	0	0	0	0.71
04.10.2021	0	0	0	0.65
04.11.2021	0	0	0	1.02
04.12.2021	0	6	5	1.47
04.13.2021	0	0	0	0.73
04.14.2021	0	1	0	0.63
04.15.2021	0	0	0	0.65
04.16.2021	0	1	0	0.58
04.17.2021	0	0	0	0.57
04.18.2021	0	0	0	0.56
04.19.2021	0	0	0	0.55
04.20.2021	0	0	0	0.55
04.21.2021	0	0	0	0.54
04.22.2021	0	0	0	0.54
04.23.2021	0	0	0	0.53
04.24.2021	0	0	0	0.52
04.25.2021	0	0	0	0.53
04.26.2021	0	0	0	0.52
04.27.2021	0	0	0	0.52
04.28.2021	0	0	0	0.52
04.29.2021	0	2	1	1.49
04.30.2021	0	0	6	1.46
05.01.2021	0	0	4	2.93
05.02.2021	0	0	3	2.91
05.03.2021	0	0	3	1.74
05.04.2021	0	0	1	1.2
05.05.2021	0	0	0	1.03
05.06.2021	0	0	0	1.02
05.07.2021	0	0	0	0.9
05.08.2021	0	0	0	0.8
05.09.2021	0	0	0	0.77
05.10.2021	0	0	2	0.9
05.11.2021	0	0	3	2.8
05.12.2021	0	0	1	2.37
05.13.2021	0	0	1	1.9
05.14.2021	0	0	2	1.63
05.15.2021	0	0	0	1.27
05.16.2021	0	0	3	1.18
05.17.2021	0	0	0	1.18
05.18.2021	0	0	1	0.94
05.19.2021	0	0	0	0.89
05.20.2021	0	0	0	0.82
05.21.2021	0	0	2	0.79
05.22.2021	0	0	2	1.55
05.23.2021	0	0	0	0.91
05.24.2021	0	0	3	1.74
05.25.2021	0	0	0	1.17
05.26.2021	0	0	0	1
05.27.2021	0	0	0	0.92
05.28.2021	0	0	2	0.87
05.29.2021	0	0	1	0.84
05.30.2021	0	0	2	0.8
05.31.2021	0	0	0	0.77
06.01.2021	0	0	1	0.77
06.02.2021	0	0	2	0.76
06.03.2021	0	0	1	0.73
06.04.2021	0	0	1	0.72
06.05.2021	0	0	0	0.69
06.06.2021	0	0	0	0.66
06.07.2021	0	0	1	0.67
08.06.2021	0	0	0	0.67
09.06.2021	0	0	0	0.74
10.06.2021	0	0	0	0.61
11.06.2021	0	0	0	0.6
12.06.2021	0	0	0	0.57
13.06.2021	0	0	0	0.54
14.06.2021	0	0	0	0.52
15.06.2021	0	0	0	0.49
16.06.2021	0	0	0	0.49
17.06.2021	0	0	0	0.49
18.06.2021	0	0	0	0.46
19.06.2021	0	0	0	0.45
20.06.2021	0	0	0	0.81
21.06.2021	0	0	0	0.48
22.06.2021	0	0	0	0.53
23.06.2021	0	0	0	0.45
24.06.2021	0	0	0	0.4
25.06.2021	0	0	0	0.38
26.06.2021	0	0	0	0.35
27.06.2021	0	0	0	0.36
28.06.2021	0	0	0	0.36
29.06.2021	0	0	0	0.37
30.06.2021	0	0	0	0.38
01.07.2021	0	0	0	0.34
02.07.2021	0	0	0	0.33
03.07.2021	0	0	0	0.32
04.07.2021	0	0	0	1.02
05.07.2021	0	0	0	0.44
06.07.2021	0	0	0	0.37
07.07.2021	0	0	0	0.72
08.07.2021	0	0	0	1.32
09.07.2021	0	0	0	0.55
10.07.2021	0	0	0	0.43
11.07.2021	0	0	0	0.46
12.07.2021	0	0	0	0.43
13.07.2021	0	0	2	1.05
14.07.2021	0	0	3	0.51
15.07.2021	0	0	3	0.64
16.07.2021	0	0	2	0.58
17.07.2021	0	0	0	0.39
18.07.2021	0	0	0	0.4
19.07.2021	0	0	0	0.41
20.07.2021	0	0	0	0.39
21.07.2021	0	0	0	0.38
22.07.2021	0	0	1	0.37
23.07.2021	0	0	0	0.36
24.07.2021	0	0	1	0.43
25.07.2021	0	0	2	3.54
26.07.2021	0	0	5	4.32
27.07.2021	1	0	4	11.04
28.07.2021	0	0	3	4.03
29.07.2021	0	0	3	1.96
30.07.2021	0	0	2	1.19
31.07.2021	0	0	3	1.87
01.08.2021	0	0	3	2.44
02.08.2021	0	0	1	1.52
03.08.2021	0	0	1	1.19
04.08.2021	0	0	1	8.76
05.08.2021	0	0	1	6.81
06.08.2021	0	0	0	3.49
07.08.2021	0	0	0	2.26
08.08.2021	0	0	0	1.58
09.08.2021	0	0	0	1.29
10.08.2021	0	0	0	1.16
11.08.2021	0	0	0	1.04
12.08.2021	0	0	0	0.95
13.08.2021	0	0	0	0.87
14.08.2021	0	0	0	0.83
15.08.2021	0	0	1	0.81
16.08.2021	0	0	0	0.78
17.08.2021	0	0	0	0.75
18.08.2021	0	0	0	0.74
19.08.2021	0	0	0	0.71
20.08.2021	0	0	0	0.7
21.08.2021	0	0	0	0.71
22.08.2021	0	0	1	0.71
23.08.2021	0	0	1	0.71
24.08.2021	0	0	1	0.71
25.08.2021	0	0	2	1.17
26.08.2021	0	0	0	0.7
27.08.2021	0	0	0	0.67
28.08.2021	0	0	1	0.67
29.08.2021	0	0	1	0.62
30.08.2021	0	0	1	0.58
31.08.2021	0	0	1	0.59
01.09.2021	0	0	1	0.52
02.09.2021	0	0	1	0.5
03.09.2021	0	0	1	0.48
04.09.2021	0	0	1	0.44
05.09.2021	0	0	1	0.4
06.09.2021	0	0	1	0.45
07.09.2021	0	0	1	0.36
08.09.2021	0	0	1	0.35
09.09.2021	0	0	1	0.34
10.09.2021	0	0	1	0.32
11.09.2021	0	0	1	0.32
12.09.2021	0	0	2	0.32
13.09.2021	0	0	1	0.34
14.09.2021	0	0	1	0.32
15.09.2021	0	0	1	0.58
16.09.2021	0	0	2	0.94
17.09.2021	0	0	1	0.48
18.09.2021	0	0	1	0.51
19.09.2021	0	0	2	8.29
20.09.2021	0	0	1	1.61
21.09.2021	0	0	0	0.85
22.09.2021	0	0	1	0.69
23.09.2021	0	0	0	0.62
24.09.2021	0	0	0	0.58
25.09.2021	0	0	1	0.54
26.09.2021	0	0	1	2.27
27.09.2021	0	0	1	1.23
28.09.2021	0	0	0	0.8
29.09.2021	0	0	0	1.16
30.09.2021	0	0	1	0.7
01.10.2021	0	0	0	0.65
02.10.2021	0	0	0	0.61
03.10.2021	0	0	1	0.93
04.10.2021	0	0	2	3.03
05.10.2021	0	0	2	8.54
06.10.2021	0	0	2	3.76
07.10.2021	0	0	0	2.35
08.10.2021	0	0	0	1.61
09.10.2021	0	0	1	1.32
10.10.2021	0	0	0	1.2
11.10.2021	0	0	1	1.13
12.10.2021	0	0	1	1.03
13.10.2021	0	0	1	0.94
14.10.2021	0	0	1	0.87
15.10.2021	0	0	1	0.81
16.10.2021	0	0	1	0.77
17.10.2021	0	0	1	0.75
18.10.2021	0	0	1	0.72
19.10.2021	0	0	1	0.71
20.10.2021	0	0	1	0.7
21.10.2021	0	0	1	0.76
22.10.2021	0	0	1	0.65
23.10.2021	0	0	1	0.62
24.10.2021	0	0	1	0.6
25.10.2021	0	0	1	0.59
26.10.2021	0	0	1	0.58
27.10.2021	0	0	1	0.55
28.10.2021	0	0	1	0.54
29.10.2021	0	0	0	0.51
30.10.2021	0	0	0	0.51
31.10.2021	0	0	0	0.52
01.11.2021	0	0	1	1.72
02.11.2021	0	0	1	0.76
03.11.2021	0	0	2	1.87
04.11.2021	0	21	2	3.17
05.11.2021	8	29	1	2.13
06.11.2021	13	12	1	1.09
07.11.2021	6	10	0	0.96
08.11.2021	3	3	0	0.89
09.11.2021	0	5	1	0.81
10.11.2021	1	0	1	0.78
11.11.2021	1	0	1	0.75
12.11.2021	0	0	1	0.73
13.11.2021	0	4	1	0.87
14.11.2021	1	2	2	1.5
15.11.2021	0	1	1	1.21
16.11.2021	0	2	1	0.99
17.11.2021	0	0	1	0.98
18.11.2021	0	1	1	0.86
19.11.2021	0	0	1	0.81
20.11.2021	0	1	1	0.79
21.11.2021	0	0	1	0.78
22.11.2021	0	0	2	1.1
23.11.2021	0	0	1	1.2
24.11.2021	0	0	0	0.95
25.11.2021	0	1	1	1.11
26.11.2021	0	1	1	1
27.11.2021	0	0	1	1.42
28.11.2021	0	1	1	2.61
29.11.2021	0	1	2	1.41
30.11.2021	0	0	2	1.25
01.12.2021	1	0	1	1.2
02.12.2021	0	0	1	1.15
03.12.2021	2	2	1	1.09
04.12.2021	1	1	1	1.03
05.12.2021	2	1	1	0.98
06.12.2021	1	0	0	0.92
07.12.2021	1	0	1	0.87
08.12.2021	1	0	1	1.01
09.12.2021	1	0	1	1.05
10.12.2021	2	1	1	0.8
11.12.2021	1	1	2	0.78
12.12.2021	1	1	1	0.74
13.12.2021	2	0	1	0.75
14.12.2021	2	0	1	0.79
15.12.2021	1	0	1	0.81
16.12.2021	1	0	1	0.79
17.12.2021	1	0	0	0.77
18.12.2021	0	0	0	0.73
19.12.2021	0	0	0	0.73
20.12.2021	1	0	0	0.71
21.12.2021	1	0	0	0.7
22.12.2021	0	0	1	0.68
23.12.2021	1	0	0	0.67
24.12.2021	1	0	1	0.64
25.12.2021	1	0	1	0.63
26.12.2021	1	0	1	0.61
27.12.2021	1	1	2	0.62
28.12.2021	1	2	1	0.6
29.12.2021	1	0	1	0.59
30.12.2021	1	0	1	0.56
31.12.2021	1	0	0	0.55
01.01.2022	1	1	0	0.54
02.01.2022	1	1	1	0.54
03.01.2022	1	0	0	0.54
04.01.2022	1	0	0	0.55
05.01.2022	1	0	1	0.83
06.01.2022	1	0	0	0.53
07.01.2022	1	0	0	0.53
08.01.2022	0	0	0	0.51
09.01.2022	0	0	0	0.51
10.01.2022	0	0	0	0.51
11.01.2022	0	0	0	0.49
12.01.2022	0	0	0	0.48
13.01.2022	0	0	0	0.47
14.01.2022	0	0	0	0.46
15.01.2022	0	0	0	0.46
16.01.2022	0	0	0	0.46
17.01.2022	0	0	0	0.46
18.01.2022	0	0	1	0.45
19.01.2022	0	0	1	0.44
20.01.2022	0	0	1	0.44
21.01.2022	0	0	0	0.42
22.01.2022	0	0	0	0.41
23.01.2022	0	0	1	0.4
24.01.2022	0	0	2	0.4
25.01.2022	0	0	2	0.4
26.01.2022	1	0	1	0.39
27.01.2022	0	0	1	0.39
28.01.2022	0	0	0	0.38
29.01.2022	0	0	1	0.37
30.01.2022	0	0	1	0.37
31.01.2022	0	0	1	0.38
01.02.2022	0	0	1	0.36
02.02.2022	0	0	1	0.36
03.02.2022	0	0	0	0.36
04.02.2022	0	0	0	0.35
05.02.2022	0	0	0	0.34
06.02.2022	0	0	0	0.33
07.02.2022	0	0	0	0.33
08.02.2022	0	0	0	0.32
09.02.2022	0	0	0	0.32
10.02.2022	1	0	0	0.32
11.02.2022	1	1	0	0.32
12.02.2022	0	1	0	0.3
13.02.2022	0	0	0	0.31
14.02.2022	0	0	1	0.36
15.02.2022	0	0	0	0.67
16.02.2022	0	0	0	0.4
17.02.2022	0	0	0	0.34
18.02.2022	0	0	0	0.33
19.02.2022	0	0	0	0.33
20.02.2022	0	0	0	0.32
21.02.2022	0	0	1	0.32
22.02.2022	0	0	0	0.31
23.02.2022	0	0	0	0.32
24.02.2022	0	0	0	0.32
25.02.2022	0	0	0	0.31
26.02.2022	0	1	0	0.29
27.02.2022	0	2	0	0.3
28.02.2022	1	1	0	0.31
01.03.2022	0	0	0	0.3
02.03.2022	0	0	0	0.3
03.03.2022	0	1	0	0.3
04.03.2022	0	0	0	0.3
05.03.2022	0	0	0	0.29
06.03.2022	0	0	0	0.29
07.03.2022	0	0	0	0.3
08.03.2022	0	0	0	0.29
09.03.2022	0	0	0	0.3
10.03.2022	0	0	0	0.29
11.03.2022	0	0	0	0.28
12.03.2022	0	0	0	0.28
13.03.2022	0	0	0	0.29
14.03.2022	0	0	0	0.29
15.03.2022	0	0	0	0.31
16.03.2022	0	0	0	0.29
17.03.2022	0	0	0	0.28
18.03.2022	0	0	0	0.28
19.03.2022	0	0	0	0.26
20.03.2022	0	1	0	0.27
21.03.2022	0	1	0	0.28
22.03.2022	0	0	0	0.28
23.03.2022	0	0	0	0.28
24.03.2022	0	0	0	0.28
25.03.2022	0	0	0	0.27
26.03.2022	0	0	0	0.26
27.03.2022	0	0	0	0.26
28.03.2022	0	0	0	0.28
29.03.2022	0	0	0	0.3
30.03.2022	0	0	0	0.43
31.03.2022	0	0	1	0.33
01.04.2022	0	0	1	0.76
02.04.2022	0	0	0	0.39
03.04.2022	0	0	0	0.29
04.04.2022	0	0	0	0.38
05.04.2022	0	0	0	0.3
06.04.2022	0	0	0	0.31
07.04.2022	0	0	0	0.31
08.04.2022	0	0	0	0.32
09.04.2022	0	0	0	0.29
10.04.2022	0	0	0	0.29
11.04.2022	0	0	0	0.31
12.04.2022	0	0	0	0.33
13.04.2022	0	0	0	0.34
14.04.2022	0	0	0	0.36
15.04.2022	0	0	0	0.36
16.04.2022	0	0	0	0.35
17.04.2022	0	0	1	0.34
18.04.2022	0	0	0	0.35
19.04.2022	0	0	0	0.37
20.04.2022	0	0	0	0.34
21.04.2022	0	0	0	0.34
22.04.2022	0	0	0	0.34
23.04.2022	1	0	0	1.25
24.04.2022	0	0	1	0.62
25.04.2022	0	0	1	0.49
26.04.2022	0	0	2	0.84
27.04.2022	0	0	1	0.41
28.04.2022	0	0	0	0.37
29.04.2022	0	0	0	0.35
30.04.2022	0	0	0	0.32

## Sheet: Hatchery
Release date	HEX Tag ID	DEC Tag ID	Release site ID	Age		In this sheet you can find the data about the hatchery fish release.
10.29.2020	3DD.003D7A9FC9	989.001031446473	Laveggio settore 2 Serre Oberti	Lacustre 1+		You can find the unique PIT tag code of each hatchery fish, their release site and their age, divided between the two release date (see relese date column).
10.29.2020	3DD.003D7A9FB9	989.001031446457	Laveggio settore 2 Serre Oberti	Lacustre 1+
10.29.2020	3DD.003D7A9FB6	989.001031446454	Laveggio settore 2 Serre Oberti	Lacustre 1+
10.29.2020	3DD.003D7A9F1A	989.001031446298	Laveggio settore 2 Serre Oberti	Lacustre 1+
10.29.2020	3DD.003D7A9F1E	989.001031446302	Laveggio settore 2 Serre Oberti	Lacustre 1+
10.29.2020	3DD.003D7A9F6C	989.001031446380	Laveggio settore 2 Serre Oberti	Lacustre 1+
10.29.2020	3DD.003D7A9F9F	989.001031446431	Laveggio settore 2 Serre Oberti	Lacustre 1+
10.29.2020	3DD.003D7A9F3B	989.001031446331	Laveggio settore 2 Serre Oberti	Lacustre 1+
10.29.2020	3DD.003D7A9F94	989.001031446420	Laveggio settore 2 Serre Oberti	Lacustre 1+
10.29.2020	3DD.003D7A9F38	989.001031446328	Laveggio settore 2 Serre Oberti	Lacustre 1+
10.29.2020	3DD.003D7A9FCA	989.001031446474	Laveggio settore 2 Serre Oberti	Lacustre 1+
10.29.2020	3DD.003D7A9F1F	989.001031446303	Laveggio settore 2 Serre Oberti	Lacustre 1+
10.29.2020	3DD.003D7A9F47	989.001031446343	Laveggio settore 2 Serre Oberti	Lacustre 1+
10.29.2020	3DD.003D7A9F91	989.001031446417	Laveggio settore 2 Serre Oberti	Lacustre 1+
10.29.2020	3DD.003D7A9F4E	989.001031446350	Laveggio settore 2 Serre Oberti	Lacustre 1+
10.29.2020	3DD.003D7A9F3A	989.001031446330	Laveggio settore 2 Serre Oberti	Lacustre 1+
10.29.2020	3DD.003D7A9FBE	989.001031446462	Laveggio settore 2 Serre Oberti	Lacustre 1+
10.29.2020	3DD.003D7A9F61	989.001031446369	Laveggio settore 2 Serre Oberti	Lacustre 1+
10.29.2020	3DD.003D7A9F2B	989.001031446315	Laveggio settore 2 Serre Oberti	Lacustre 1+
10.29.2020	3DD.003D7A9F22	989.001031446306	Laveggio settore 2 Serre Oberti	Lacustre 1+
10.29.2020	3DD.003D7A9F59	989.001031446361	Laveggio settore 2 Serre Oberti	Lacustre 1+
10.29.2020	3DD.003D7A9FC6	989.001031446470	Laveggio settore 2 Serre Oberti	Lacustre 1+
10.29.2020	3DD.003D7A9F78	989.001031446392	Laveggio settore 2 Serre Oberti	Lacustre 1+
10.29.2020	3DD.003D7A9F56	989.001031446358	Laveggio settore 2 Serre Oberti	Lacustre 1+
10.29.2020	3DD.003D7A9F80	989.001031446400	Laveggio settore 2 Serre Oberti	Lacustre 1+
10.29.2020	3DD.003D7A9F28	989.001031446312	Laveggio settore 2 Serre Oberti	Lacustre 1+
10.29.2020	3DD.003D7A9F2D	989.001031446317	Laveggio settore 2 Serre Oberti	Lacustre 1+
10.29.2020	3DD.003D7A9FC7	989.001031446471	Laveggio settore 2 Serre Oberti	Lacustre 1+
10.29.2020	3DD.003D7A9F42	989.001031446338	Laveggio settore 2 Serre Oberti	Lacustre 1+
10.29.2020	3DD.003D7A9FD3	989.001031446483	Laveggio settore 2 Serre Oberti	Lacustre 1+
10.29.2020	3DD.003D7A9F6A	989.001031446378	Laveggio settore 2 Serre Oberti	Lacustre 1+
10.29.2020	3DD.003D7A9F30	989.001031446320	Laveggio settore 2 Serre Oberti	Lacustre 1+
10.29.2020	3DD.003D7A9F5F	989.001031446367	Laveggio settore 2 Serre Oberti	Lacustre 1+
10.29.2020	3DD.003D7A9F8B	989.001031446411	Laveggio settore 2 Serre Oberti	Lacustre 1+
10.29.2020	3DD.003D7A9F1B	989.001031446299	Laveggio settore 2 Serre Oberti	Lacustre 1+
10.29.2020	3DD.003D7A9F67	989.001031446375	Laveggio settore 2 Serre Oberti	Lacustre 1+
10.29.2020	3DD.003D7A9F3C	989.001031446332	Laveggio settore 2 Serre Oberti	Lacustre 1+
10.29.2020	3DD.003D7A9FD7	989.001031446487	Laveggio settore 2 Serre Oberti	Lacustre 1+
10.29.2020	3DD.003D7A9F41	989.001031446337	Laveggio settore 2 Serre Oberti	Lacustre 1+
10.29.2020	3DD.003D7A9F36	989.001031446326	Laveggio settore 2 Serre Oberti	Lacustre 1+
10.29.2020	3DD.003D7A9F8C	989.001031446412	Laveggio settore 2 Serre Oberti	Lacustre 1+
10.29.2020	3DD.003D7A9F26	989.001031446310	Laveggio settore 2 Serre Oberti	Lacustre 1+
10.29.2020	3DD.003D7A9F84	989.001031446404	Laveggio settore 2 Serre Oberti	Lacustre 1+
10.29.2020	3DD.003D7A9FDA	989.001031446490	Laveggio settore 2 Serre Oberti	Lacustre 1+
10.29.2020	3DD.003D7A9FB5	989.001031446453	Laveggio settore 2 Serre Oberti	Lacustre 1+
10.29.2020	3DD.003D7A9F7B	989.001031446395	Laveggio settore 2 Serre Oberti	Lacustre 1+
10.29.2020	3DD.003D7A9F9E	989.001031446430	Laveggio settore 2 Serre Oberti	Lacustre 1+
10.29.2020	3DD.003D7A9FCF	989.001031446479	Laveggio settore 2 Serre Oberti	Lacustre 1+
10.29.2020	3DD.003D7A9FBA	989.001031446458	Laveggio settore 2 Serre Oberti	Lacustre 1+
10.29.2020	3DD.003D7A9F93	989.001031446419	Laveggio settore 2 Serre Oberti	Lacustre 1+
10.29.2020	3DD.003D7A9F87	989.001031446407	Laveggio settore 2 Serre Oberti	Lacustre 1+
10.29.2020	3DD.003D7A9FA4	989.001031446436	Laveggio settore 2 Serre Oberti	Lacustre 1+
10.29.2020	3DD.003D7A9FDF	989.001031446495	Laveggio settore 2 Serre Oberti	Lacustre 1+
10.29.2020	3DD.003D7A9F96	989.001031446422	Laveggio settore 2 Serre Oberti	Lacustre 1+
10.29.2020	3DD.003D7AA003	989.001031446531	Laveggio settore 2 Serre Oberti	Lacustre 1+
10.29.2020	3DD.003D7A9F82	989.001031446402	Laveggio settore 2 Serre Oberti	Lacustre 1+
10.29.2020	3DD.003D7AA031	989.001031446577	Laveggio settore 2 Serre Oberti	Lacustre 1+
10.29.2020	3DD.003D7A9FF3	989.001031446515	Laveggio settore 2 Serre Oberti	Lacustre 1+
10.29.2020	3DD.003D7A9F98	989.001031446424	Laveggio settore 2 Serre Oberti	Lacustre 1+
10.29.2020	3DD.003D7A9F99	989.001031446425	Laveggio settore 2 Serre Oberti	Lacustre 1+
10.29.2020	3DD.003D7A9FB3	989.001031446451	Laveggio settore 2 Serre Oberti	Lacustre 1+
10.29.2020	3DD.003D7AA02E	989.001031446574	Laveggio settore 2 Serre Oberti	Lacustre 1+
10.29.2020	3DD.003D7AA01A	989.001031446554	Laveggio settore 2 Serre Oberti	Lacustre 1+
10.29.2020	3DD.003D7A9FD1	989.001031446481	Laveggio settore 2 Serre Oberti	Lacustre 1+
10.29.2020	3DD.003D7A9FA5	989.001031446437	Laveggio settore 2 Serre Oberti	Lacustre 1+
10.29.2020	3DD.003D7AA027	989.001031446567	Laveggio settore 2 Serre Oberti	Lacustre 1+
10.29.2020	3DD.003D7A9FF7	989.001031446519	Laveggio settore 2 Serre Oberti	Lacustre 1+
10.29.2020	3DD.003D7A9FAE	989.001031446446	Laveggio settore 2 Serre Oberti	Lacustre 1+
10.29.2020	3DD.003D7AA01C	989.001031446556	Laveggio settore 2 Serre Oberti	Lacustre 1+
10.29.2020	3DD.003D7AA015	989.001031446549	Laveggio settore 2 Serre Oberti	Lacustre 1+
10.29.2020	3DD.003D7A9FB0	989.001031446448	Laveggio settore 2 Serre Oberti	Lacustre 1+
10.29.2020	3DD.003D7A9DD8	989.001031445976	Laveggio settore 2 Serre Oberti	Lacustre 1+
10.29.2020	3DD.003D7A9FCE	989.001031446478	Laveggio settore 2 Serre Oberti	Lacustre 1+
10.29.2020	3DD.003D7A9FC5	989.001031446469	Laveggio settore 2 Serre Oberti	Lacustre 1+
10.29.2020	3D9.1C2DEE940D	985.121029694477	Laveggio settore 2 Serre Oberti	Lacustre 1+
10.29.2020	3DD.003D7A9F89	989.001031446409	Laveggio settore 2 Serre Oberti	Lacustre 1+
10.29.2020	3DD.003D7A9F92	989.001031446418	Laveggio settore 2 Serre Oberti	Lacustre 1+
10.29.2020	3DD.003D7A9F85	989.001031446405	Laveggio settore 2 Serre Oberti	Lacustre 1+
10.29.2020	3DD.003D7A9DDD	989.001031445981	Laveggio settore 2 Serre Oberti	Lacustre 2+
10.29.2020	3DD.003D7A9DEE	989.001031445998	Laveggio settore 2 Serre Oberti	Lacustre 2+
10.29.2020	3DD.003D7A9D93	989.001031445907	Laveggio settore 2 Serre Oberti	Lacustre 2+
10.29.2020	3DD.003D7A9D88	989.001031445896	Laveggio settore 2 Serre Oberti	Lacustre 2+
10.29.2020	3DD.003D7A9DB8	989.001031445944	Laveggio settore 2 Serre Oberti	Lacustre 2+
10.29.2020	3DD.003D7A9DB3	989.001031445939	Laveggio settore 2 Serre Oberti	Lacustre 2+
10.29.2020	3DD.003D7A9DD2	989.001031445970	Laveggio settore 2 Serre Oberti	Lacustre 2+
10.29.2020	3DD.003D7A9DE0	989.001031445984	Laveggio settore 2 Serre Oberti	Lacustre 2+
10.29.2020	3DD.003D7A9DD9	989.001031445977	Laveggio settore 2 Serre Oberti	Lacustre 2+
10.29.2020	3DD.003D7A9D9A	989.001031445914	Laveggio settore 2 Serre Oberti	Lacustre 2+
10.29.2020	3DD.003D7A9DE4	989.001031445988	Laveggio settore 2 Serre Oberti	Lacustre 2+
10.29.2020	3DD.003D7A9DC2	989.001031445954	Laveggio settore 2 Serre Oberti	Lacustre 2+
10.29.2020	3DD.003D7A9DC1	989.001031445953	Laveggio settore 2 Serre Oberti	Lacustre 2+
10.29.2020	3DD.003D7A9DCB	989.001031445963	Laveggio settore 2 Serre Oberti	Lacustre 2+
10.29.2020	3DD.003D7A9DDF	989.001031445983	Laveggio settore 2 Serre Oberti	Lacustre 2+
10.29.2020	3DD.003D7A9DB6	989.001031445942	Laveggio settore 2 Serre Oberti	Lacustre 2+
10.29.2020	3DD.003D7A9D8C	989.001031445900	Laveggio settore 2 Serre Oberti	Lacustre 2+
10.29.2020	3DD.003D7A9DE6	989.001031445990	Laveggio settore 2 Serre Oberti	Lacustre 2+
10.29.2020	3DD.003D7A9DA0	989.001031445920	Laveggio settore 2 Serre Oberti	Lacustre 2+
10.29.2020	3DD.003D7A9DB9	989.001031445945	Laveggio settore 2 Serre Oberti	Lacustre 2+
10.29.2020	3DD.003D7A9DD5	989.001031445973	Laveggio settore 2 Serre Oberti	Lacustre 2+
10.29.2020	3DD.003D7A9DC8	989.001031445960	Laveggio settore 2 Serre Oberti	Lacustre 2+
10.29.2020	3DD.003D7A9D9F	989.001031445919	Laveggio settore 2 Serre Oberti	Lacustre 2+
10.29.2020	3DD.003D7A9DCF	989.001031445967	Laveggio settore 2 Serre Oberti	Lacustre 2+
10.29.2020	3DD.003D7A9DAE	989.001031445934	Laveggio settore 2 Serre Oberti	Lacustre 2+
10.29.2020	3DD.003D7A9DC4	989.001031445956	Laveggio settore 2 Serre Oberti	Lacustre 2+
10.29.2020	3DD.003D7A9D99	989.001031445913	Laveggio settore 2 Serre Oberti	Lacustre 2+
10.29.2020	3DD.003D7A9D87	989.001031445895	Laveggio settore 2 Serre Oberti	Lacustre 2+
10.29.2020	3DD.003D7A9DAD	989.001031445933	Laveggio settore 2 Serre Oberti	Lacustre 2+
10.29.2020	3DD.003D7A9D92	989.001031445906	Laveggio settore 2 Serre Oberti	Lacustre 2+
10.29.2020	3DD.003D7A9D9E	989.001031445918	Laveggio settore 2 Serre Oberti	Lacustre 2+
10.29.2020	3DD.003D7A9DA4	989.001031445924	Laveggio settore 2 Serre Oberti	Lacustre 2+
10.29.2020	3DD.003D7A9D9B	989.001031445915	Laveggio settore 2 Serre Oberti	Lacustre 2+
10.29.2020	3DD.003D7A9D96	989.001031445910	Laveggio settore 2 Serre Oberti	Lacustre 2+
10.29.2020	3DD.003D7A9DD3	989.001031445971	Laveggio settore 2 Serre Oberti	Lacustre 2+
10.29.2020	3DD.003D7A9DBE	989.001031445950	Laveggio settore 2 Serre Oberti	Lacustre 2+
10.29.2020	3DD.003D7A9DBD	989.001031445949	Laveggio settore 2 Serre Oberti	Lacustre 2+
10.29.2020	3DD.003D7A9DC0	989.001031445952	Laveggio settore 2 Serre Oberti	Lacustre 2+
10.29.2020	3DD.003D7A9DAA	989.001031445930	Laveggio settore 2 Serre Oberti	Lacustre 2+
10.29.2020	3DD.003D7A9DC3	989.001031445955	Laveggio settore 2 Serre Oberti	Lacustre 2+
10.29.2020	3DD.003D7A9DEA	989.001031445994	Laveggio settore 2 Serre Oberti	Lacustre 2+
10.29.2020	3DD.003D7A9DA8	989.001031445928	Laveggio settore 2 Serre Oberti	Lacustre 2+
10.29.2020	3DD.003D7A9D89	989.001031445897	Laveggio settore 2 Serre Oberti	Lacustre 2+
10.29.2020	3DD.003D7A9DE9	989.001031445993	Laveggio settore 2 Serre Oberti	Lacustre 2+
10.29.2020	3DD.003D7A9DBC	989.001031445948	Laveggio settore 2 Serre Oberti	Lacustre 2+
10.29.2020	3DD.003D7A9DDA	989.001031445978	Laveggio settore 2 Serre Oberti	Lacustre 2+
10.29.2020	3DD.003D7A9DDC	989.001031445980	Laveggio settore 2 Serre Oberti	Lacustre 2+
10.29.2020	3DD.003D7A9D90	989.001031445904	Laveggio settore 2 Serre Oberti	Lacustre 2+
10.29.2020	3DD.003D7A9D9D	989.001031445917	Laveggio settore 2 Serre Oberti	Lacustre 2+
10.29.2020	3DD.003D7A9DCC	989.001031445964	Laveggio settore 2 Serre Oberti	Lacustre 2+
10.29.2020	3DD.003D7A9D91	989.001031445905	Laveggio settore 2 Serre Oberti	Lacustre 2+
10.29.2020	3DD.003D7A9D98	989.001031445912	Laveggio settore 2 Serre Oberti	Lacustre 2+
10.29.2020	3DD.003D7A9DDB	989.001031445979	Laveggio settore 2 Serre Oberti	Lacustre 2+
10.29.2020	3DD.003D7A9D8B	989.001031445899	Laveggio settore 2 Serre Oberti	Lacustre 2+
10.29.2020	3DD.003D7A9DB1	989.001031445937	Laveggio settore 2 Serre Oberti	Lacustre 2+
10.29.2020	3DD.003D7A9DBB	989.001031445947	Laveggio settore 2 Serre Oberti	Lacustre 2+
10.29.2020	3DD.003D7A9DD1	989.001031445969	Laveggio settore 2 Serre Oberti	Lacustre 2+
10.29.2020	3DD.003D7A9DB0	989.001031445936	Laveggio settore 2 Serre Oberti	Lacustre 2+
10.29.2020	3DD.003D7A9DCE	989.001031445966	Laveggio settore 2 Serre Oberti	Lacustre 2+
10.29.2020	3DD.003D7A9DB4	989.001031445940	Laveggio settore 2 Serre Oberti	Lacustre 2+
10.29.2020	3DD.003D7A9DC5	989.001031445957	Laveggio settore 2 Serre Oberti	Lacustre 2+
10.29.2020	3DD.003D7A9DE1	989.001031445985	Laveggio settore 2 Serre Oberti	Lacustre 2+
10.29.2020	3DD.003D7A9DBF	989.001031445951	Laveggio settore 2 Serre Oberti	Lacustre 2+
10.29.2020	3DD.003D7A9DCA	989.001031445962	Laveggio settore 2 Serre Oberti	Lacustre 2+
10.29.2020	3DD.003D7A9DAF	989.001031445935	Laveggio settore 2 Serre Oberti	Lacustre 2+
10.29.2020	3DD.003D7A9DBA	989.001031445946	Laveggio settore 2 Serre Oberti	Lacustre 2+
10.29.2020	3DD.003D7A9DD6	989.001031445974	Laveggio settore 2 Serre Oberti	Lacustre 2+
10.29.2020	3DD.003D7A9D94	989.001031445908	Laveggio settore 2 Serre Oberti	Lacustre 2+
10.29.2020	3DD.003D7A9DA7	989.001031445927	Laveggio settore 2 Serre Oberti	Lacustre 2+
10.29.2020	3DD.003D7A9D8E	989.001031445902	Laveggio settore 2 Serre Oberti	Lacustre 2+
10.29.2020	3DD.003D7A9DE5	989.001031445989	Laveggio settore 2 Serre Oberti	Lacustre 2+
10.29.2020	3DD.003D7A9D97	989.001031445911	Laveggio settore 2 Serre Oberti	Lacustre 2+
10.29.2020	3DD.003D7A9FAC	989.001031446444	Laveggio settore 2 Serre Oberti	Lacustre 2+
10.29.2020	3DD.003D7A9FAD	989.001031446445	Laveggio settore 2 Serre Oberti	Lacustre 2+
10.29.2020	3DD.003D7A9FDC	989.001031446492	Laveggio settore 3 Penate	Lacustre 1+
10.29.2020	3DD.003D7A9FF0	989.001031446512	Laveggio settore 3 Penate	Lacustre 1+
10.29.2020	3DD.003D7AA063	989.001031446627	Laveggio settore 3 Penate	Lacustre 1+
10.29.2020	3DD.003D7AA0A2	989.001031446690	Laveggio settore 3 Penate	Lacustre 1+
10.29.2020	3DD.003D7AA05D	989.001031446621	Laveggio settore 3 Penate	Lacustre 1+
10.29.2020	3DD.003D7AA041	989.001031446593	Laveggio settore 3 Penate	Lacustre 1+
10.29.2020	3DD.003D7AA021	989.001031446561	Laveggio settore 3 Penate	Lacustre 1+
10.29.2020	3DD.003D7AA0A6	989.001031446694	Laveggio settore 3 Penate	Lacustre 1+
10.29.2020	3DD.003D7AA001	989.001031446529	Laveggio settore 3 Penate	Lacustre 1+
10.29.2020	3DD.003D7AA068	989.001031446632	Laveggio settore 3 Penate	Lacustre 1+
10.29.2020	3DD.003D7AA033	989.001031446579	Laveggio settore 3 Penate	Lacustre 1+
10.29.2020	3DD.003D7AA069	989.001031446633	Laveggio settore 3 Penate	Lacustre 1+
10.29.2020	3DD.003D7AA026	989.001031446566	Laveggio settore 3 Penate	Lacustre 1+
10.29.2020	3DD.003D7AA052	989.001031446610	Laveggio settore 3 Penate	Lacustre 1+
10.29.2020	3DD.003D7AA060	989.001031446624	Laveggio settore 3 Penate	Lacustre 1+
10.29.2020	3DD.003D7A9E1D	989.001031446045	Laveggio settore 3 Penate	Lacustre 1+
10.29.2020	3DD.003D7AA023	989.001031446563	Laveggio settore 3 Penate	Lacustre 1+
10.29.2020	3DD.003D7AA07A	989.001031446650	Laveggio settore 3 Penate	Lacustre 1+
10.29.2020	3DD.003D7AA064	989.001031446628	Laveggio settore 3 Penate	Lacustre 1+
10.29.2020	3DD.003D7A9FFC	989.001031446524	Laveggio settore 3 Penate	Lacustre 1+
10.29.2020	3DD.003D7AA02F	989.001031446575	Laveggio settore 3 Penate	Lacustre 1+
10.29.2020	3DD.003D7AA050	989.001031446608	Laveggio settore 3 Penate	Lacustre 1+
10.29.2020	3DD.003D7AA039	989.001031446585	Laveggio settore 3 Penate	Lacustre 1+
10.29.2020	3DD.003D7AA028	989.001031446568	Laveggio settore 3 Penate	Lacustre 1+
10.29.2020	3DD.003D7AA032	989.001031446578	Laveggio settore 3 Penate	Lacustre 1+
10.29.2020	3DD.003D7AA08D	989.001031446669	Laveggio settore 3 Penate	Lacustre 1+
10.29.2020	3DD.003D7AA014	989.001031446548	Laveggio settore 3 Penate	Lacustre 1+
10.29.2020	3DD.003D7AA0A5	989.001031446693	Laveggio settore 3 Penate	Lacustre 1+
10.29.2020	3DD.003D7AA091	989.001031446673	Laveggio settore 3 Penate	Lacustre 1+
10.29.2020	3DD.003D7AA03D	989.001031446589	Laveggio settore 3 Penate	Lacustre 1+
10.29.2020	3DD.003D7AA042	989.001031446594	Laveggio settore 3 Penate	Lacustre 1+
10.29.2020	3DD.003D7AA04B	989.001031446603	Laveggio settore 3 Penate	Lacustre 1+
10.29.2020	3DD.003D7AA03B	989.001031446587	Laveggio settore 3 Penate	Lacustre 1+
10.29.2020	3DD.003D7AA02A	989.001031446570	Laveggio settore 3 Penate	Lacustre 1+
10.29.2020	3DD.003D7AA0A4	989.001031446692	Laveggio settore 3 Penate	Lacustre 1+
10.29.2020	3DD.003D7AA085	989.001031446661	Laveggio settore 3 Penate	Lacustre 1+
10.29.2020	3DD.003D7AA00F	989.001031446543	Laveggio settore 3 Penate	Lacustre 1+
10.29.2020	3DD.003D7AA06C	989.001031446636	Laveggio settore 3 Penate	Lacustre 1+
10.29.2020	3DD.003D7AA036	989.001031446582	Laveggio settore 3 Penate	Lacustre 1+
10.29.2020	3DD.003D7AA08E	989.001031446670	Laveggio settore 3 Penate	Lacustre 1+
10.29.2020	3DD.003D7AA012	989.001031446546	Laveggio settore 3 Penate	Lacustre 1+
10.29.2020	3DD.003D7AA06B	989.001031446635	Laveggio settore 3 Penate	Lacustre 1+
10.29.2020	3DD.003D7AA005	989.001031446533	Laveggio settore 3 Penate	Lacustre 1+
10.29.2020	3DD.003D7AA087	989.001031446663	Laveggio settore 3 Penate	Lacustre 1+
10.29.2020	3DD.003D7A9FE8	989.001031446504	Laveggio settore 3 Penate	Lacustre 1+
10.29.2020	3DD.003D7AA059	989.001031446617	Laveggio settore 3 Penate	Lacustre 1+
10.29.2020	3DD.003D7AA038	989.001031446584	Laveggio settore 3 Penate	Lacustre 1+
10.29.2020	3DD.003D7AA098	989.001031446680	Laveggio settore 3 Penate	Lacustre 1+
10.29.2020	3DD.003D7AA03E	989.001031446590	Laveggio settore 3 Penate	Lacustre 1+
10.29.2020	3DD.003D7A9E43	989.001031446083	Laveggio settore 3 Penate	Lacustre 1+
10.29.2020	3DD.003D7AA017	989.001031446551	Laveggio settore 3 Penate	Lacustre 1+
10.29.2020	3DD.003D7AA07B	989.001031446651	Laveggio settore 3 Penate	Lacustre 1+
10.29.2020	3DD.003D7AA09B	989.001031446683	Laveggio settore 3 Penate	Lacustre 1+
10.29.2020	3DD.003D7AA035	989.001031446581	Laveggio settore 3 Penate	Lacustre 1+
10.29.2020	3DD.003D7AA030	989.001031446576	Laveggio settore 3 Penate	Lacustre 1+
10.29.2020	3DD.003D7AA05E	989.001031446622	Laveggio settore 3 Penate	Lacustre 1+
10.29.2020	3DD.003D7A9FFA	989.001031446522	Laveggio settore 3 Penate	Lacustre 1+
10.29.2020	3DD.003D7A9FF5	989.001031446517	Laveggio settore 3 Penate	Lacustre 1+
10.29.2020	3DD.003D7AA062	989.001031446626	Laveggio settore 3 Penate	Lacustre 1+
10.29.2020	3DD.003D7AA02D	989.001031446573	Laveggio settore 3 Penate	Lacustre 1+
10.29.2020	3DD.003D7A9FED	989.001031446509	Laveggio settore 3 Penate	Lacustre 1+
10.29.2020	3DD.003D7AA020	989.001031446560	Laveggio settore 3 Penate	Lacustre 1+
10.29.2020	3DD.003D7AA01E	989.001031446558	Laveggio settore 3 Penate	Lacustre 1+
10.29.2020	3DD.003D7AA01B	989.001031446555	Laveggio settore 3 Penate	Lacustre 1+
10.29.2020	3DD.003D7AA011	989.001031446545	Laveggio settore 3 Penate	Lacustre 1+
10.29.2020	3DD.003D7AA080	989.001031446656	Laveggio settore 3 Penate	Lacustre 1+
10.29.2020	3DD.003D7A9FF4	989.001031446516	Laveggio settore 3 Penate	Lacustre 1+
10.29.2020	3DD.003D7A9F5D	989.001031446365	Laveggio settore 3 Penate	Lacustre 1+
10.29.2020	3DD.003D7AA03F	989.001031446591	Laveggio settore 3 Penate	Lacustre 1+
10.29.2020	3DD.003D7AA08B	989.001031446667	Laveggio settore 3 Penate	Lacustre 1+
10.29.2020	3DD.003D7AA007	989.001031446535	Laveggio settore 3 Penate	Lacustre 1+
10.29.2020	3DD.003D7AA08A	989.001031446666	Laveggio settore 3 Penate	Lacustre 1+
10.29.2020	3DD.003D7A9FE3	989.001031446499	Laveggio settore 3 Penate	Lacustre 1+
10.29.2020	3DD.003D7AA047	989.001031446599	Laveggio settore 3 Penate	Lacustre 1+
10.29.2020	3DD.003D7AA0A7	989.001031446695	Laveggio settore 3 Penate	Lacustre 1+
10.29.2020	3DD.003D7AA01D	989.001031446557	Laveggio settore 3 Penate	Lacustre 1+
10.29.2020	3DD.003D7A9FFF	989.001031446527	Laveggio settore 3 Penate	Lacustre 1+
10.29.2020	3DD.003D7AA04E	989.001031446606	Laveggio settore 3 Penate	Lacustre 1+
10.29.2020	3DD.003D7AA010	989.001031446544	Laveggio settore 3 Penate	Lacustre 1+
10.29.2020	3DD.003D7AA04D	989.001031446605	Laveggio settore 3 Penate	Lacustre 1+
10.29.2020	3DD.003D7AA018	989.001031446552	Laveggio settore 3 Penate	Lacustre 1+
10.29.2020	3DD.003D7AA06F	989.001031446639	Laveggio settore 3 Penate	Lacustre 1+
10.29.2020	3DD.003D7A9FEF	989.001031446511	Laveggio settore 3 Penate	Lacustre 1+
10.29.2020	3DD.003D7AA0A3	989.001031446691	Laveggio settore 3 Penate	Lacustre 1+
10.29.2020	3DD.003D7AA00B	989.001031446539	Laveggio settore 3 Penate	Lacustre 1+
10.29.2020	3DD.003D7AA043	989.001031446595	Laveggio settore 3 Penate	Lacustre 1+
10.29.2020	3DD.003D7AA081	989.001031446657	Laveggio settore 3 Penate	Lacustre 1+
10.29.2020	3DD.003D7AA057	989.001031446615	Laveggio settore 3 Penate	Lacustre 1+
10.29.2020	3DD.003D7AA016	989.001031446550	Laveggio settore 3 Penate	Lacustre 1+
10.29.2020	3DD.003D7AA07D	989.001031446653	Laveggio settore 3 Penate	Lacustre 1+
10.29.2020	3DD.003D7A9FF1	989.001031446513	Laveggio settore 3 Penate	Lacustre 1+
10.29.2020	3DD.003D7AA072	989.001031446642	Laveggio settore 3 Penate	Lacustre 1+
10.29.2020	3DD.003D7AA006	989.001031446534	Laveggio settore 3 Penate	Lacustre 1+
10.29.2020	3DD.003D7AA02B	989.001031446571	Laveggio settore 3 Penate	Lacustre 1+
10.29.2020	3DD.003D7AA099	989.001031446681	Laveggio settore 3 Penate	Lacustre 1+
10.29.2020	3DD.003D7A9FEC	989.001031446508	Laveggio settore 3 Penate	Lacustre 1+
10.29.2020	3DD.003D7AA024	989.001031446564	Laveggio settore 3 Penate	Lacustre 1+
10.29.2020	3DD.003D7A9FEB	989.001031446507	Laveggio settore 3 Penate	Lacustre 1+
10.29.2020	3DD.003D7AA079	989.001031446649	Laveggio settore 3 Penate	Lacustre 1+
10.29.2020	3DD.003D7AA008	989.001031446536	Laveggio settore 3 Penate	Lacustre 1+
10.29.2020	3DD.003D7AA08F	989.001031446671	Laveggio settore 3 Penate	Lacustre 1+
10.29.2020	3DD.003D7AA00C	989.001031446540	Laveggio settore 3 Penate	Lacustre 1+
10.29.2020	3DD.003D7AA083	989.001031446659	Laveggio settore 3 Penate	Lacustre 1+
10.29.2020	3DD.003D7A9FE5	989.001031446501	Laveggio settore 3 Penate	Lacustre 1+
10.29.2020	3DD.003D7AA084	989.001031446660	Laveggio settore 3 Penate	Lacustre 1+
10.29.2020	3DD.003D7A9FE9	989.001031446505	Laveggio settore 3 Penate	Lacustre 1+
10.29.2020	3DD.003D7A9FE1	989.001031446497	Laveggio settore 3 Penate	Lacustre 1+
10.29.2020	3DD.003D7AA095	989.001031446677	Laveggio settore 3 Penate	Lacustre 1+
10.29.2020	3DD.003D7A9FFD	989.001031446525	Laveggio settore 3 Penate	Lacustre 1+
10.29.2020	3DD.003D7AA076	989.001031446646	Laveggio settore 3 Penate	Lacustre 1+
10.29.2020	3DD.003D7AA000	989.001031446528	Laveggio settore 3 Penate	Lacustre 1+
10.29.2020	3DD.003D7AA066	989.001031446630	Laveggio settore 3 Penate	Lacustre 1+
10.29.2020	3DD.003D7A9FF6	989.001031446518	Laveggio settore 3 Penate	Lacustre 1+
10.29.2020	3DD.003D7AA09F	989.001031446687	Laveggio settore 3 Penate	Lacustre 1+
10.29.2020	3DD.003D7AA019	989.001031446553	Laveggio settore 3 Penate	Lacustre 1+
10.29.2020	3DD.003D7A9FE7	989.001031446503	Laveggio settore 3 Penate	Lacustre 1+
10.29.2020	3DD.003D7AA03A	989.001031446586	Laveggio settore 3 Penate	Lacustre 1+
10.29.2020	3DD.003D7AA058	989.001031446616	Laveggio settore 3 Penate	Lacustre 1+
10.29.2020	3DD.003D7A9FF2	989.001031446514	Laveggio settore 3 Penate	Lacustre 1+
10.29.2020	3DD.003D7A9FEA	989.001031446506	Laveggio settore 3 Penate	Lacustre 1+
10.29.2020	3DD.003D7AA06E	989.001031446638	Laveggio settore 3 Penate	Lacustre 1+
10.29.2020	3DD.003D7AA08C	989.001031446668	Laveggio settore 3 Penate	Lacustre 1+
10.29.2020	3DD.003D7AA034	989.001031446580	Laveggio settore 3 Penate	Lacustre 1+
10.29.2020	3DD.003D7A9FE4	989.001031446500	Laveggio settore 3 Penate	Lacustre 1+
10.29.2020	3DD.003D7A9FFE	989.001031446526	Laveggio settore 3 Penate	Lacustre 1+
10.29.2020	3DD.003D7AA0C4	989.001031446724	Laveggio settore 3 Penate	Lacustre 1+
10.29.2020	3DD.003D7AA0D8	989.001031446744	Laveggio settore 3 Penate	Lacustre 1+
10.29.2020	3DD.003D7AA0B1	989.001031446705	Laveggio settore 3 Penate	Lacustre 1+
10.29.2020	3DD.003D7AA054	989.001031446612	Laveggio settore 3 Penate	Lacustre 1+
10.29.2020	3DD.003D7AA0B7	989.001031446711	Laveggio settore 3 Penate	Lacustre 1+
10.29.2020	3DD.003D7AA109	989.001031446793	Laveggio settore 3 Penate	Lacustre 1+
10.29.2020	3DD.003D7AA0E8	989.001031446760	Laveggio settore 3 Penate	Lacustre 1+
10.29.2020	3DD.003D7AA0C5	989.001031446725	Laveggio settore 3 Penate	Lacustre 1+
10.29.2020	3DD.003D7AA0C7	989.001031446727	Laveggio settore 3 Penate	Lacustre 1+
10.29.2020	3DD.003D7AA0BA	989.001031446714	Laveggio settore 3 Penate	Lacustre 1+
10.29.2020	3DD.003D7AA0D1	989.001031446737	Laveggio settore 3 Penate	Lacustre 1+
10.29.2020	3DD.003D7AA070	989.001031446640	Laveggio settore 3 Penate	Lacustre 1+
10.29.2020	3DD.003D7AA077	989.001031446647	Laveggio settore 3 Penate	Lacustre 1+
10.29.2020	3DD.003D7AA0BE	989.001031446718	Laveggio settore 3 Penate	Lacustre 1+
10.29.2020	3DD.003D7AA0ED	989.001031446765	Laveggio settore 3 Penate	Lacustre 1+
10.29.2020	3DD.003D7AA056	989.001031446614	Laveggio settore 3 Penate	Lacustre 1+
10.29.2020	3DD.003D7AA0AE	989.001031446702	Laveggio settore 3 Penate	Lacustre 1+
10.29.2020	3DD.003D7AA0B3	989.001031446707	Laveggio settore 3 Penate	Lacustre 1+
10.29.2020	3DD.003D7AA0F4	989.001031446772	Laveggio settore 3 Penate	Lacustre 1+
10.29.2020	3DD.003D7AA053	989.001031446611	Laveggio settore 3 Penate	Lacustre 1+
10.29.2020	3DD.003D7AA0C0	989.001031446720	Laveggio settore 3 Penate	Lacustre 1+
10.29.2020	3DD.003D7AA09E	989.001031446686	Laveggio settore 3 Penate	Lacustre 1+
10.29.2020	3DD.003D7AA0BD	989.001031446717	Laveggio settore 3 Penate	Lacustre 1+
10.29.2020	3DD.003D7AA0D6	989.001031446742	Laveggio settore 3 Penate	Lacustre 1+
10.29.2020	3DD.003D7AA044	989.001031446596	Laveggio settore 3 Penate	Lacustre 1+
10.29.2020	3DD.003D7AA0EC	989.001031446764	Laveggio settore 3 Penate	Lacustre 1+
10.29.2020	3DD.003D7AA0DA	989.001031446746	Laveggio settore 3 Penate	Lacustre 1+
10.29.2020	3DD.003D7AA065	989.001031446629	Laveggio settore 3 Penate	Lacustre 1+
10.29.2020	3DD.003D7AA0DC	989.001031446748	Laveggio settore 3 Penate	Lacustre 1+
10.29.2020	3DD.003D7AA073	989.001031446643	Laveggio settore 3 Penate	Lacustre 1+
10.29.2020	3DD.003D7AA0F3	989.001031446771	Laveggio settore 3 Penate	Lacustre 1+
10.29.2020	3DD.003D7AA0C8	989.001031446728	Laveggio settore 3 Penate	Lacustre 1+
10.29.2020	3DD.003D7AA094	989.001031446676	Laveggio settore 3 Penate	Lacustre 1+
10.29.2020	3DD.003D7AA090	989.001031446672	Laveggio settore 3 Penate	Lacustre 1+
10.29.2020	3DD.003D7AA0E4	989.001031446756	Laveggio settore 3 Penate	Lacustre 1+
10.29.2020	3DD.003D7AA0B5	989.001031446709	Laveggio settore 3 Penate	Lacustre 1+
10.29.2020	3DD.003D7AA074	989.001031446644	Laveggio settore 3 Penate	Lacustre 1+
10.29.2020	3DD.003D7AA0AD	989.001031446701	Laveggio settore 3 Penate	Lacustre 1+
10.29.2020	3DD.003D7AA0D0	989.001031446736	Laveggio settore 3 Penate	Lacustre 1+
10.29.2020	3DD.003D7AA0C6	989.001031446726	Laveggio settore 3 Penate	Lacustre 1+
10.29.2020	3DD.003D7AA06D	989.001031446637	Laveggio settore 3 Penate	Lacustre 1+
10.29.2020	3DD.003D7AA0DD	989.001031446749	Laveggio settore 3 Penate	Lacustre 1+
10.29.2020	3DD.003D7AA0BB	989.001031446715	Laveggio settore 3 Penate	Lacustre 1+
10.29.2020	3DD.003D7AA05B	989.001031446619	Laveggio settore 3 Penate	Lacustre 1+
10.29.2020	3DD.003D7AA0AC	989.001031446700	Laveggio settore 3 Penate	Lacustre 1+
10.29.2020	3DD.003D7AA09C	989.001031446684	Laveggio settore 3 Penate	Lacustre 1+
10.29.2020	3DD.003D7AA0F1	989.001031446769	Laveggio settore 3 Penate	Lacustre 1+
10.29.2020	3DD.003D7A9F73	989.001031446387	Laveggio settore 3 Penate	Lacustre 1+
10.29.2020	3DD.003BD030C5	989.001003499717	Laveggio settore 3 Penate	Lacustre 1+
10.29.2020	3DD.003D7AA097	989.001031446679	Laveggio settore 3 Penate	Lacustre 1+
10.29.2020	3DD.003D7AA049	989.001031446601	Laveggio settore 3 Penate	Lacustre 1+
10.29.2020	3DD.003D7AA0E7	989.001031446759	Laveggio settore 3 Penate	Lacustre 1+
10.29.2020	3DD.003D7AA045	989.001031446597	Laveggio settore 3 Penate	Lacustre 1+
10.29.2020	3DD.003D7AA0E2	989.001031446754	Laveggio settore 3 Penate	Lacustre 1+
10.29.2020	3DD.003D7AA093	989.001031446675	Laveggio settore 3 Penate	Lacustre 1+
10.29.2020	3DD.003D7AA0C1	989.001031446721	Laveggio settore 3 Penate	Lacustre 1+
10.29.2020	3DD.003D7AA0F2	989.001031446770	Laveggio settore 3 Penate	Lacustre 1+
10.29.2020	3DD.003D7AA0D7	989.001031446743	Laveggio settore 3 Penate	Lacustre 1+
10.29.2020	3DD.003D7AA0DE	989.001031446750	Laveggio settore 3 Penate	Lacustre 1+
10.29.2020	3DD.003D7AA0D5	989.001031446741	Laveggio settore 3 Penate	Lacustre 1+
10.29.2020	3DD.003D7AA0B8	989.001031446712	Laveggio settore 3 Penate	Lacustre 1+
10.29.2020	3DD.003D7AA0EA	989.001031446762	Laveggio settore 3 Penate	Lacustre 1+
10.29.2020	3DD.003D7AA0AB	989.001031446699	Laveggio settore 3 Penate	Lacustre 1+
10.29.2020	3DD.003D7AA078	989.001031446648	Laveggio settore 3 Penate	Lacustre 1+
10.29.2020	3DD.003D7AA0E6	989.001031446758	Laveggio settore 3 Penate	Lacustre 1+
10.29.2020	3DD.003D7AA046	989.001031446598	Laveggio settore 3 Penate	Lacustre 1+
10.29.2020	3DD.003D7AA04F	989.001031446607	Laveggio settore 3 Penate	Lacustre 1+
10.29.2020	3DD.003D7AA0CA	989.001031446730	Laveggio settore 3 Penate	Lacustre 1+
10.29.2020	3DD.003D7AA0EB	989.001031446763	Laveggio settore 3 Penate	Lacustre 1+
10.29.2020	3DD.003D7AA0BF	989.001031446719	Laveggio settore 3 Penate	Lacustre 1+
10.29.2020	3DD.003D7AA088	989.001031446664	Laveggio settore 3 Penate	Lacustre 1+
10.29.2020	3DD.003D7A9E88	989.001031446152	Laveggio settore 3 Penate	Lacustri 2+
10.29.2020	3DD.003D7A9E5A	989.001031446106	Laveggio settore 3 Penate	Lacustri 2+
10.29.2020	3DD.003D7A9D2D	989.001031445805	Laveggio settore 3 Penate	Lacustri 2+
10.29.2020	3DD.003D7A9E6F	989.001031446127	Laveggio settore 3 Penate	Lacustri 2+
10.29.2020	3DD.003D7A9D3D	989.001031445821	Laveggio settore 3 Penate	Lacustri 2+
10.29.2020	3DD.003D7A9EAE	989.001031446190	Laveggio settore 3 Penate	Lacustri 2+
10.29.2020	3DD.003D7A9E7D	989.001031446141	Laveggio settore 3 Penate	Lacustri 2+
10.29.2020	3DD.003D7A9F69	989.001031446377	Laveggio settore 3 Penate	Lacustri 2+
10.29.2020	3DD.003D7A9E59	989.001031446105	Laveggio settore 3 Penate	Lacustri 2+
10.29.2020	3DD.003D7A9D83	989.001031445891	Laveggio settore 3 Penate	Lacustri 2+
10.29.2020	3DD.003D7A9F17	989.001031446295	Laveggio settore 3 Penate	Lacustri 2+
10.29.2020	3DD.003D7A9D26	989.001031445798	Laveggio settore 3 Penate	Lacustri 2+
10.29.2020	3DD.003D7A9F14	989.001031446292	Laveggio settore 3 Penate	Lacustri 2+
10.29.2020	3DD.003D7A9D23	989.001031445795	Laveggio settore 3 Penate	Lacustri 2+
10.29.2020	3DD.003D7A9F13	989.001031446291	Laveggio settore 3 Penate	Lacustri 2+
10.29.2020	3DD.003D7A9EA0	989.001031446176	Laveggio settore 3 Penate	Lacustri 2+
10.29.2020	3DD.003D7A9D42	989.001031445826	Laveggio settore 3 Penate	Lacustri 2+
10.29.2020	3DD.003D7A9F09	989.001031446281	Laveggio settore 3 Penate	Lacustri 2+
10.29.2020	3DD.003D7A9F0F	989.001031446287	Laveggio settore 3 Penate	Lacustri 2+
10.29.2020	3DD.003D7A9D71	989.001031445873	Laveggio settore 3 Penate	Lacustri 2+
10.29.2020	3DD.003D7A9F0C	989.001031446284	Laveggio settore 3 Penate	Lacustri 2+
10.29.2020	3DD.003D7A9D2F	989.001031445807	Laveggio settore 3 Penate	Lacustri 2+
10.29.2020	3DD.003D7A9ED1	989.001031446225	Laveggio settore 3 Penate	Lacustri 2+
10.29.2020	3DD.003D7A9E93	989.001031446163	Laveggio settore 3 Penate	Lacustri 2+
10.29.2020	3DD.003D7A9D7E	989.001031445886	Laveggio settore 3 Penate	Lacustri 2+
10.29.2020	3DD.003D7A9E7B	989.001031446139	Laveggio settore 3 Penate	Lacustri 2+
10.29.2020	3DD.003D7A9EE0	989.001031446240	Laveggio settore 3 Penate	Lacustri 2+
10.29.2020	3DD.003D7A9E6E	989.001031446126	Laveggio settore 3 Penate	Lacustri 2+
10.29.2020	3DD.003D7A9D29	989.001031445801	Laveggio settore 3 Penate	Lacustri 2+
10.29.2020	3DD.003D7A9EA7	989.001031446183	Laveggio settore 3 Penate	Lacustri 2+
10.29.2020	3DD.003D7A9D2B	989.001031445803	Laveggio settore 3 Penate	Lacustri 2+
10.29.2020	3DD.003D7A9F10	989.001031446288	Laveggio settore 3 Penate	Lacustri 2+
10.29.2020	3DD.003D7A9D24	989.001031445796	Laveggio settore 3 Penate	Lacustri 2+
10.29.2020	3DD.003D7A9EE5	989.001031446245	Laveggio settore 3 Penate	Lacustri 2+
10.29.2020	3DD.003D7A9D63	989.001031445859	Laveggio settore 3 Penate	Lacustri 2+
10.29.2020	3DD.003D7A9EAF	989.001031446191	Laveggio settore 3 Penate	Lacustri 2+
10.29.2020	3DD.003D7A9D7F	989.001031445887	Laveggio settore 3 Penate	Lacustri 2+
10.29.2020	3DD.003D7A9E8E	989.001031446158	Laveggio settore 3 Penate	Lacustri 2+
10.29.2020	3DD.003D7A9EA2	989.001031446178	Laveggio settore 3 Penate	Lacustri 2+
10.29.2020	3DD.003D7A9D32	989.001031445810	Laveggio settore 3 Penate	Lacustri 2+
10.29.2020	3DD.003D7A9E5E	989.001031446110	Laveggio settore 3 Penate	Lacustri 2+
10.29.2020	3DD.003D7A9D52	989.001031445842	Laveggio settore 3 Penate	Lacustri 2+
10.29.2020	3DD.003D7A9EB2	989.001031446194	Laveggio settore 3 Penate	Lacustri 2+
10.29.2020	3DD.003D7A9E78	989.001031446136	Laveggio settore 3 Penate	Lacustri 2+
10.29.2020	3DD.003D7A9D76	989.001031445878	Laveggio settore 3 Penate	Lacustri 2+
10.29.2020	3DD.003D7A9E89	989.001031446153	Laveggio settore 3 Penate	Lacustri 2+
10.29.2020	3DD.003D7A9E83	989.001031446147	Laveggio settore 3 Penate	Lacustri 2+
10.29.2020	3DD.003D7A9D2C	989.001031445804	Laveggio settore 3 Penate	Lacustri 2+
10.29.2020	3DD.003D7A9D48	989.001031445832	Laveggio settore 3 Penate	Lacustri 2+
10.29.2020	3DD.003D7A9E9E	989.001031446174	Laveggio settore 3 Penate	Lacustri 2+
10.29.2020	3DD.003D7A9D61	989.001031445857	Laveggio settore 3 Penate	Lacustri 2+
10.29.2020	3DD.003D7A9E62	989.001031446114	Laveggio settore 3 Penate	Lacustri 2+
10.29.2020	3DD.003D7A9E6B	989.001031446123	Laveggio settore 3 Penate	Lacustri 2+
10.29.2020	3DD.003D7A9D31	989.001031445809	Laveggio settore 3 Penate	Lacustri 2+
10.29.2020	3DD.003D7A9E6C	989.001031446124	Laveggio settore 3 Penate	Lacustri 2+
10.29.2020	3DD.003D7A9EFF	989.001031446271	Laveggio settore 3 Penate	Lacustri 2+
10.29.2020	3DD.003D7A9D65	989.001031445861	Laveggio settore 3 Penate	Lacustri 2+
10.29.2020	3DD.003D7A9E9A	989.001031446170	Laveggio settore 3 Penate	Lacustri 2+
10.29.2020	3DD.003D7A9EFE	989.001031446270	Laveggio settore 3 Penate	Lacustri 2+
10.29.2020	3DD.003D7A9D5F	989.001031445855	Laveggio settore 3 Penate	Lacustri 2+
10.29.2020	3DD.003D7A9E97	989.001031446167	Laveggio settore 3 Penate	Lacustri 2+
10.29.2020	3DD.003D7A9EFC	989.001031446268	Laveggio settore 3 Penate	Lacustri 2+
10.29.2020	3DD.003D7A9D80	989.001031445888	Laveggio settore 3 Penate	Lacustri 2+
10.29.2020	3DD.003D7A9EA1	989.001031446177	Laveggio settore 3 Penate	Lacustri 2+
10.29.2020	3DD.003D7A9EE3	989.001031446243	Laveggio settore 3 Penate	Lacustri 2+
10.29.2020	3DD.003D7A9D28	989.001031445800	Laveggio settore 3 Penate	Lacustri 2+
10.29.2020	3DD.003D7A9F08	989.001031446280	Laveggio settore 3 Penate	Lacustri 2+
10.29.2020	3DD.003D7A9E70	989.001031446128	Laveggio settore 3 Penate	Lacustri 2+
10.29.2020	3DD.003D7A9D50	989.001031445840	Laveggio settore 3 Penate	Lacustri 2+
10.29.2020	3DD.003D7A9E5F	989.001031446111	Laveggio settore 3 Penate	Lacustri 2+
10.29.2020	3DD.003D7A9D73	989.001031445875	Laveggio settore 3 Penate	Lacustri 2+
10.29.2020	3DD.003D7A9E53	989.001031446099	Laveggio settore 3 Penate	Lacustri 2+
10.29.2020	3DD.003D7A9EF3	989.001031446259	Laveggio settore 3 Penate	Lacustri 2+
10.29.2020	3DD.003D7A9D41	989.001031445825	Laveggio settore 3 Penate	Lacustri 2+
10.29.2020	3DD.003D7A9D84	989.001031445892	Laveggio settore 3 Penate	Lacustri 2+
10.29.2020	3DD.003D7A9EA6	989.001031446182	Laveggio settore 3 Penate	Lacustri 2+
10.29.2020	3DD.003D7A9E56	989.001031446102	Laveggio settore 3 Penate	Lacustri 2+
10.29.2020	3DD.003D7A9D5E	989.001031445854	Laveggio settore 3 Penate	Lacustri 2+
10.29.2020	3DD.003D7A9E75	989.001031446133	Laveggio settore 3 Penate	Lacustri 2+
10.29.2020	3DD.003D7A9D3B	989.001031445819	Laveggio settore 3 Penate	Lacustri 2+
10.29.2020	3DD.003D7A9D40	989.001031445824	Laveggio settore 3 Penate	Lacustri 2+
10.29.2020	3DD.003D7A9E7A	989.001031446138	Laveggio settore 3 Penate	Lacustri 2+
10.29.2020	3DD.003D7A9D4D	989.001031445837	Laveggio settore 3 Penate	Lacustri 2+
10.29.2020	3DD.003D7A9E69	989.001031446121	Laveggio settore 3 Penate	Lacustri 2+
10.29.2020	3DD.003D7A9D54	989.001031445844	Laveggio settore 3 Penate	Lacustri 2+
10.29.2020	3DD.003D7A9EDA	989.001031446234	Laveggio settore 3 Penate	Lacustri 2+
10.29.2020	3DD.003D7A9E60	989.001031446112	Laveggio settore 3 Penate	Lacustri 2+
10.29.2020	3DD.003D7A9D59	989.001031445849	Laveggio settore 3 Penate	Lacustri 2+
10.29.2020	3DD.003D7A9EF4	989.001031446260	Laveggio settore 3 Penate	Lacustri 2+
10.29.2020	3DD.003D7A9D4F	989.001031445839	Laveggio settore 3 Penate	Lacustri 2+
10.29.2020	3DD.003D7A9D74	989.001031445876	Laveggio settore 3 Penate	Lacustri 2+
10.29.2020	3DD.003D7A9EDE	989.001031446238	Laveggio settore 3 Penate	Lacustri 2+
10.29.2020	3DD.003D7AA0A8	989.001031446696	Laveggio settore 3 Penate	Lacustri 2+
10.29.2020	3DD.003D7A9E7F	989.001031446143	Laveggio settore 3 Penate	Lacustri 2+
10.29.2020	3DD.003D7AA103	989.001031446787	Laveggio settore 3 Penate	Lacustri 2+
10.29.2020	3DD.003D7A9F11	989.001031446289	Laveggio settore 3 Penate	Lacustri 2+
10.29.2020	3DD.003D7AA0D4	989.001031446740	Laveggio settore 3 Penate	Lacustri 2+
10.29.2020	3DD.003D7A9E8D	989.001031446157	Laveggio settore 3 Penate	Lacustri 2+
10.29.2020	3DD.003D7A9EFB	989.001031446267	Laveggio settore 3 Penate	Lacustri 2+
10.29.2020	3DD.003D7AA0B4	989.001031446708	Laveggio settore 3 Penate	Lacustri 2+
10.29.2020	3DD.003D7A9E91	989.001031446161	Laveggio settore 3 Penate	Lacustri 2+
10.29.2020	3DD.003D7AA0FC	989.001031446780	Laveggio settore 3 Penate	Lacustri 2+
10.29.2020	3DD.003D7A9EF1	989.001031446257	Laveggio settore 3 Penate	Lacustri 2+
10.29.2020	3DD.003D7A9F0D	989.001031446285	Laveggio settore 3 Penate	Lacustri 2+
10.29.2020	3DD.003D7AA0FF	989.001031446783	Laveggio settore 3 Penate	Lacustri 2+
10.29.2020	3DD.003D7A9E77	989.001031446135	Laveggio settore 3 Penate	Lacustri 2+
10.29.2020	3DD.003D7A9F02	989.001031446274	Laveggio settore 3 Penate	Lacustri 2+
10.29.2020	3DD.003D7A9E73	989.001031446131	Laveggio settore 3 Penate	Lacustri 2+
10.29.2020	3DD.003D7A9EA8	989.001031446184	Laveggio settore 3 Penate	Lacustri 2+
10.29.2020	3DD.003D7AA0CD	989.001031446733	Laveggio settore 3 Penate	Lacustri 2+
10.29.2020	3DD.003D7A9E58	989.001031446104	Laveggio settore 3 Penate	Lacustri 2+
10.29.2020	3DD.003D7AA004	989.001031446532	Laveggio settore 3 Penate	Lacustri 2+
10.29.2020	3DD.003D7A9F0A	989.001031446282	Laveggio settore 3 Penate	Lacustri 2+
10.29.2020	3DD.003D7AA02C	989.001031446572	Laveggio settore 3 Penate	Lacustri 2+
10.29.2020	3DD.003D7A9EC7	989.001031446215	Laveggio settore 3 Penate	Lacustri 2+
10.29.2020	3DD.003D7A9EAB	989.001031446187	Laveggio settore 3 Penate	Lacustri 2+
10.29.2020	3DD.003D7A9FE0	989.001031446496	Laveggio settore 3 Penate	Lacustri 2+
10.29.2020	3DD.003D7A9E65	989.001031446117	Laveggio settore 3 Penate	Lacustri 2+
10.29.2020	3DD.003D7A9EF7	989.001031446263	Laveggio settore 3 Penate	Lacustri 2+
10.29.2020	3DD.003D7AA0E0	989.001031446752	Laveggio settore 3 Penate	Lacustri 2+
10.29.2020	3DD.003D7A9E96	989.001031446166	Laveggio settore 3 Penate	Lacustri 2+
10.29.2020	3DD.003D7A9EEA	989.001031446250	Laveggio settore 3 Penate	Lacustri 2+
10.29.2020	3DD.003D7AA16F	989.001031446895	Laveggio settore 3 Penate	Lacustri 2+
10.29.2020	3DD.003D7A9EAD	989.001031446189	Laveggio settore 3 Penate	Lacustri 2+
10.29.2020	3DD.003D7A9EFA	989.001031446266	Laveggio settore 3 Penate	Lacustri 2+
10.29.2020	3DD.003D7A9F0B	989.001031446283	Laveggio settore 3 Penate	Lacustri 2+
10.29.2020	3DD.003D7AA160	989.001031446880	Laveggio settore 3 Penate	Lacustri 2+
10.29.2020	3DD.003D7AA135	989.001031446837	Laveggio settore 3 Penate	Lacustri 2+
10.29.2020	3DD.003D7AA0CC	989.001031446732	Laveggio settore 3 Penate	Lacustri 2+
10.29.2020	3DD.003D7A9E86	989.001031446150	Laveggio settore 3 Penate	Lacustri 2+
10.29.2020	3DD.003D7A9FF9	989.001031446521	Laveggio settore 3 Penate	Lacustri 2+
10.29.2020	3DD.003D7A9E98	989.001031446168	Laveggio settore 3 Penate	Lacustri 2+
10.29.2020	3DD.003D7A9EE2	989.001031446242	Laveggio settore 3 Penate	Lacustri 2+
10.29.2020	3DD.003D7AA0DF	989.001031446751	Laveggio settore 3 Penate	Lacustri 2+
10.29.2020	3DD.003D7A9E95	989.001031446165	Laveggio settore 3 Penate	Lacustri 2+
10.29.2020	3DD.003D7AA040	989.001031446592	Laveggio settore 3 Penate	Lacustri 2+
10.29.2020	3DD.003D7A9E5D	989.001031446109	Laveggio settore 3 Penate	Lacustri 2+
10.29.2020	3DD.003D7AA022	989.001031446562	Laveggio settore 3 Penate	Lacustri 2+
10.29.2020	3DD.003D7AA00E	989.001031446542	Laveggio settore 3 Penate	Lacustri 2+
10.29.2020	3DD.003D7A9F06	989.001031446278	Laveggio settore 3 Penate	Lacustri 2+
10.29.2020	3DD.003D7AA157	989.001031446871	Laveggio settore 3 Penate	Lacustri 2+
10.29.2020	3DD.003D7A9F00	989.001031446272	Laveggio settore 3 Penate	Lacustri 2+
10.29.2020	3DD.003D7A9E7C	989.001031446140	Laveggio settore 3 Penate	Lacustri 2+
10.29.2020	3DD.003D7A9EAA	989.001031446186	Laveggio settore 3 Penate	Lacustri 2+
10.29.2020	3DD.003D7AA147	989.001031446855	Laveggio settore 3 Penate	Lacustri 2+
10.29.2020	3DD.003D7A9E84	989.001031446148	Laveggio settore 3 Penate	Lacustri 2+
10.29.2020	3DD.003D7A9E9D	989.001031446173	Laveggio settore 3 Penate	Lacustri 2+
10.29.2020	3DD.003D7AA141	989.001031446849	Laveggio settore 3 Penate	Lacustri 2+
10.29.2020	3DD.003D7A9EA5	989.001031446181	Laveggio settore 3 Penate	Lacustri 2+
10.29.2020	3DD.003D7A9E8F	989.001031446159	Laveggio settore 3 Penate	Lacustri 2+
10.29.2020	3DD.003D7AA11D	989.001031446813	Laveggio settore 3 Penate	Lacustri 2+
10.29.2020	3DD.003D7A9EB0	989.001031446192	Laveggio settore 3 Penate	Lacustri 2+
10.29.2020	3DD.003D7A9E90	989.001031446160	Laveggio settore 3 Penate	Lacustri 2+
10.29.2020	3DD.003D7AA0B0	989.001031446704	Laveggio settore 3 Penate	Lacustri 2+
10.29.2020	3DD.003D7AA150	989.001031446864	Laveggio settore 3 Penate	Lacustri 2+
10.29.2020	3DD.003D7AA132	989.001031446834	Laveggio settore 3 Penate	Lacustri 2+
10.29.2020	3DD.003D7AA14C	989.001031446860	Laveggio settore 3 Penate	Lacustri 2+
10.29.2020	3DD.003D7AA14D	989.001031446861	Laveggio settore 3 Penate	Lacustri 2+
10.29.2020	3DD.003D7AA128	989.001031446824	Laveggio settore 3 Penate	Lacustri 2+
10.29.2020	3DD.003D7AA13E	989.001031446846	Laveggio settore 3 Penate	Lacustri 2+
10.29.2020	3DD.003D7AA15D	989.001031446877	Laveggio settore 3 Penate	Lacustri 2+
10.29.2020	3DD.003D7AA10D	989.001031446797	Laveggio settore 3 Penate	Lacustri 2+
10.29.2020	3DD.003D7AA158	989.001031446872	Laveggio settore 3 Penate	Lacustri 2+
10.29.2020	3DD.003D7AA03C	989.001031446588	Laveggio settore 3 Penate	Lacustri 2+
10.29.2020	3DD.003D7AA14A	989.001031446858	Laveggio settore 3 Penate	Lacustri 2+
10.29.2020	3DD.003D7AA138	989.001031446840	Laveggio settore 3 Penate	Lacustri 2+
10.29.2020	3DD.003D7AA137	989.001031446839	Laveggio settore 3 Penate	Lacustri 2+
10.29.2020	3DD.003D7AA149	989.001031446857	Laveggio settore 3 Penate	Lacustri 2+
10.29.2020	3DD.003D7AA15B	989.001031446875	Laveggio settore 3 Penate	Lacustri 2+
10.29.2020	3DD.003D7AA12B	989.001031446827	Laveggio settore 3 Penate	Lacustri 2+
10.29.2020	3DD.003D7AA111	989.001031446801	Laveggio settore 3 Penate	Lacustri 2+
10.29.2020	3DD.003D7AA13C	989.001031446844	Laveggio settore 3 Penate	Lacustri 2+
10.29.2020	3DD.003D7A9FFB	989.001031446523	Laveggio settore 3 Penate	Lacustri 2+
10.29.2020	3DD.003D7AA12C	989.001031446828	Laveggio settore 3 Penate	Lacustri 2+
10.29.2020	3DD.003D7AA10E	989.001031446798	Laveggio settore 3 Penate	Lacustri 2+
10.29.2020	3DD.003D7AA145	989.001031446853	Laveggio settore 3 Penate	Lacustri 2+
10.29.2020	3DD.003D7AA11E	989.001031446814	Laveggio settore 3 Penate	Lacustri 2+
10.29.2020	3DD.003D7AA125	989.001031446821	Laveggio settore 3 Penate	Lacustri 2+
10.29.2020	3D9.1C2DD7C5B5	985.121028199861	Laveggio settore 3 Penate	Lacustri 2+
10.29.2020	3DD.003D7AA136	989.001031446838	Laveggio settore 3 Penate	Lacustri 2+
10.29.2020	3DD.003D7AA123	989.001031446819	Laveggio settore 3 Penate	Lacustri 2+
10.29.2020	3DD.003D7AA129	989.001031446825	Laveggio settore 3 Penate	Lacustri 2+
10.29.2020	3DD.003D7AA126	989.001031446822	Laveggio settore 3 Penate	Lacustri 2+
10.29.2020	3DD.003D7AA0F6	989.001031446774	Laveggio settore 3 Penate	Lacustri 2+
10.29.2020	3DD.003D7A9EB3	989.001031446195	Laveggio settore 3 Penate	Lacustri 2+
10.29.2020	3DD.003D7A9D38	989.001031445816	Laveggio settore 3 Penate	Lacustri 2+
10.29.2020	3DD.003D7AA113	989.001031446803	Laveggio Settore 4 Zona Tana	Lacustre 1+
10.29.2020	3DD.003D7AA0FE	989.001031446782	Laveggio Settore 4 Zona Tana	Lacustre 1+
10.29.2020	3DD.003D7AA12A	989.001031446826	Laveggio Settore 4 Zona Tana	Lacustre 1+
10.29.2020	3DD.003D7AA07C	989.001031446652	Laveggio Settore 4 Zona Tana	Lacustre 1+
10.29.2020	3DD.003D7AA114	989.001031446804	Laveggio Settore 4 Zona Tana	Lacustre 1+
10.29.2020	3DD.003D7AA0A1	989.001031446689	Laveggio Settore 4 Zona Tana	Lacustre 1+
10.29.2020	3DD.003D7AA107	989.001031446791	Laveggio Settore 4 Zona Tana	Lacustre 1+
10.29.2020	3DD.003D7AA0A0	989.001031446688	Laveggio Settore 4 Zona Tana	Lacustre 1+
10.29.2020	3DD.003D7AA163	989.001031446883	Laveggio Settore 4 Zona Tana	Lacustre 1+
10.29.2020	3DD.003D7AA108	989.001031446792	Laveggio Settore 4 Zona Tana	Lacustre 1+
10.29.2020	3DD.003D7AA075	989.001031446645	Laveggio Settore 4 Zona Tana	Lacustre 1+
10.29.2020	3DD.003D7AA00D	989.001031446541	Laveggio Settore 4 Zona Tana	Lacustre 1+
10.29.2020	3DD.003D7AA10A	989.001031446794	Laveggio Settore 4 Zona Tana	Lacustre 1+
10.29.2020	3DD.003D7AA11F	989.001031446815	Laveggio Settore 4 Zona Tana	Lacustre 1+
10.29.2020	3DD.003D7AA082	989.001031446658	Laveggio Settore 4 Zona Tana	Lacustre 1+
10.29.2020	3DD.003D7AA104	989.001031446788	Laveggio Settore 4 Zona Tana	Lacustre 1+
10.29.2020	3DD.003D7AA13D	989.001031446845	Laveggio Settore 4 Zona Tana	Lacustre 1+
10.29.2020	3DD.003D7AA04C	989.001031446604	Laveggio Settore 4 Zona Tana	Lacustre 1+
10.29.2020	3DD.003D7AA10B	989.001031446795	Laveggio Settore 4 Zona Tana	Lacustre 1+
10.29.2020	3DD.003D7AA110	989.001031446800	Laveggio Settore 4 Zona Tana	Lacustre 1+
10.29.2020	3DD.003D7AA09A	989.001031446682	Laveggio Settore 4 Zona Tana	Lacustre 1+
10.29.2020	3DD.003D7AA0FA	989.001031446778	Laveggio Settore 4 Zona Tana	Lacustre 1+
10.29.2020	3DD.003D7AA153	989.001031446867	Laveggio Settore 4 Zona Tana	Lacustre 1+
10.29.2020	3DD.003D7AA092	989.001031446674	Laveggio Settore 4 Zona Tana	Lacustre 1+
10.29.2020	3DD.003D7AA0F8	989.001031446776	Laveggio Settore 4 Zona Tana	Lacustre 1+
10.29.2020	3DD.003D7AA04A	989.001031446602	Laveggio Settore 4 Zona Tana	Lacustre 1+
10.29.2020	3DD.003D7AA15A	989.001031446874	Laveggio Settore 4 Zona Tana	Lacustre 1+
10.29.2020	3DD.003D7AA0C2	989.001031446722	Laveggio Settore 4 Zona Tana	Lacustre 1+
10.29.2020	3DD.003D7AA051	989.001031446609	Laveggio Settore 4 Zona Tana	Lacustre 1+
10.29.2020	3DD.003D7AA0D3	989.001031446739	Laveggio Settore 4 Zona Tana	Lacustre 1+
10.29.2020	3DD.003D7AA14B	989.001031446859	Laveggio Settore 4 Zona Tana	Lacustre 1+
10.29.2020	3DD.003D7AA0A9	989.001031446697	Laveggio Settore 4 Zona Tana	Lacustre 1+
10.29.2020	3DD.003D7AA151	989.001031446865	Laveggio Settore 4 Zona Tana	Lacustre 1+
10.29.2020	3DD.003D7AA067	989.001031446631	Laveggio Settore 4 Zona Tana	Lacustre 1+
10.29.2020	3DD.003D7AA106	989.001031446790	Laveggio Settore 4 Zona Tana	Lacustre 1+
10.29.2020	3DD.003D7AA12D	989.001031446829	Laveggio Settore 4 Zona Tana	Lacustre 1+
10.29.2020	3DD.003D7AA05C	989.001031446620	Laveggio Settore 4 Zona Tana	Lacustre 1+
10.29.2020	3DD.003D7AA07E	989.001031446654	Laveggio Settore 4 Zona Tana	Lacustre 1+
10.29.2020	3DD.003D7AA086	989.001031446662	Laveggio Settore 4 Zona Tana	Lacustre 1+
10.29.2020	3DD.003D7AA162	989.001031446882	Laveggio Settore 4 Zona Tana	Lacustre 1+
10.29.2020	3DD.003D7AA101	989.001031446785	Laveggio Settore 4 Zona Tana	Lacustre 1+
10.29.2020	3DD.003D7AA10C	989.001031446796	Laveggio Settore 4 Zona Tana	Lacustre 1+
10.29.2020	3DD.003D7AA009	989.001031446537	Laveggio Settore 4 Zona Tana	Lacustre 1+
10.29.2020	3DD.003D7AA048	989.001031446600	Laveggio Settore 4 Zona Tana	Lacustre 1+
10.29.2020	3DD.003D7AA0E5	989.001031446757	Laveggio Settore 4 Zona Tana	Lacustre 1+
10.29.2020	3DD.003D7AA0D9	989.001031446745	Laveggio Settore 4 Zona Tana	Lacustre 1+
10.29.2020	3DD.003D7AA164	989.001031446884	Laveggio Settore 4 Zona Tana	Lacustre 1+
10.29.2020	3DD.003D7AA09D	989.001031446685	Laveggio Settore 4 Zona Tana	Lacustre 1+
10.29.2020	3DD.003D7AA0C3	989.001031446723	Laveggio Settore 4 Zona Tana	Lacustre 1+
10.29.2020	3DD.003D7AA10F	989.001031446799	Laveggio Settore 4 Zona Tana	Lacustre 1+
10.29.2020	3DD.003D7AA0F9	989.001031446777	Laveggio Settore 4 Zona Tana	Lacustre 1+
10.29.2020	3DD.003D7AA071	989.001031446641	Laveggio Settore 4 Zona Tana	Lacustre 1+
10.29.2020	3DD.003D7AA15C	989.001031446876	Laveggio Settore 4 Zona Tana	Lacustre 1+
10.29.2020	3DD.003D7AA100	989.001031446784	Laveggio Settore 4 Zona Tana	Lacustre 1+
10.29.2020	3DD.003D7AA130	989.001031446832	Laveggio Settore 4 Zona Tana	Lacustre 1+
10.29.2020	3DD.003D7AA0CF	989.001031446735	Laveggio Settore 4 Zona Tana	Lacustre 1+
10.29.2020	3DD.003D7AA089	989.001031446665	Laveggio Settore 4 Zona Tana	Lacustre 1+
10.29.2020	3DD.003D7AA05F	989.001031446623	Laveggio Settore 4 Zona Tana	Lacustre 1+
10.29.2020	3DD.003D7AA13B	989.001031446843	Laveggio Settore 4 Zona Tana	Lacustre 1+
10.29.2020	3DD.003D7AA0B9	989.001031446713	Laveggio Settore 4 Zona Tana	Lacustre 1+
10.29.2020	3DD.003D7AA168	989.001031446888	Laveggio Settore 4 Zona Tana	Lacustre 1+
10.29.2020	3DD.003D7AA105	989.001031446789	Laveggio Settore 4 Zona Tana	Lacustre 1+
10.29.2020	3DD.003D7AA102	989.001031446786	Laveggio Settore 4 Zona Tana	Lacustre 1+
10.29.2020	3DD.003D7AA146	989.001031446854	Laveggio Settore 4 Zona Tana	Lacustre 1+
10.29.2020	3DD.003D7AA165	989.001031446885	Laveggio Settore 4 Zona Tana	Lacustre 1+
10.29.2020	3DD.003D7AA0AA	989.001031446698	Laveggio Settore 4 Zona Tana	Lacustre 1+
10.29.2020	3DD.003D7AA120	989.001031446816	Laveggio Settore 4 Zona Tana	Lacustre 1+
10.29.2020	3DD.003D7AA0D2	989.001031446738	Laveggio Settore 4 Zona Tana	Lacustre 1+
10.29.2020	3DD.003D7AA15E	989.001031446878	Laveggio Settore 4 Zona Tana	Lacustre 1+
10.29.2020	3DD.003D7A9FE2	989.001031446498	Laveggio Settore 4 Zona Tana	Lacustre 1+
10.29.2020	3DD.003D7AA0DB	989.001031446747	Laveggio Settore 4 Zona Tana	Lacustre 1+
10.29.2020	3DD.003D7AA117	989.001031446807	Laveggio Settore 4 Zona Tana	Lacustre 1+
10.29.2020	3DD.003D7AA13F	989.001031446847	Laveggio Settore 4 Zona Tana	Lacustre 1+
10.29.2020	3DD.003D7AA0E1	989.001031446753	Laveggio Settore 4 Zona Tana	Lacustre 1+
10.29.2020	3DD.003D7AA14F	989.001031446863	Laveggio Settore 4 Zona Tana	Lacustre 1+
10.29.2020	3DD.003D7AA142	989.001031446850	Laveggio Settore 4 Zona Tana	Lacustre 1+
10.29.2020	3DD.003D7AA00A	989.001031446538	Laveggio Settore 4 Zona Tana	Lacustre 1+
10.29.2020	3DD.003D7AA0E9	989.001031446761	Laveggio Settore 4 Zona Tana	Lacustre 1+
10.29.2020	3DD.003D7AA143	989.001031446851	Laveggio Settore 4 Zona Tana	Lacustre 1+
10.29.2020	3DD.003D7AA139	989.001031446841	Laveggio Settore 4 Zona Tana	Lacustre 1+
10.29.2020	3DD.003D7AA0BC	989.001031446716	Laveggio Settore 4 Zona Tana	Lacustre 1+
10.29.2020	3DD.003D7AA119	989.001031446809	Laveggio Settore 4 Zona Tana	Lacustre 1+
10.29.2020	3DD.003D7AA0F5	989.001031446773	Laveggio Settore 4 Zona Tana	Lacustre 1+
10.29.2020	3DD.003D7AA16C	989.001031446892	Laveggio Settore 4 Zona Tana	Lacustre 1+
10.29.2020	3DD.003D7AA0E3	989.001031446755	Laveggio Settore 4 Zona Tana	Lacustre 1+
10.29.2020	3DD.003D7AA134	989.001031446836	Laveggio Settore 4 Zona Tana	Lacustre 1+
10.29.2020	3DD.003D7AA166	989.001031446886	Laveggio Settore 4 Zona Tana	Lacustre 1+
10.29.2020	3DD.003D7AA0FD	989.001031446781	Laveggio Settore 4 Zona Tana	Lacustre 1+
10.29.2020	3DD.003D7AA154	989.001031446868	Laveggio Settore 4 Zona Tana	Lacustre 1+
10.29.2020	3DD.003D7AA131	989.001031446833	Laveggio Settore 4 Zona Tana	Lacustre 1+
10.29.2020	3DD.003D7AA124	989.001031446820	Laveggio Settore 4 Zona Tana	Lacustre 1+
10.29.2020	3DD.003D7AA167	989.001031446887	Laveggio Settore 4 Zona Tana	Lacustre 1+
10.29.2020	3DD.003D7AA0AF	989.001031446703	Laveggio Settore 4 Zona Tana	Lacustre 1+
10.29.2020	3DD.003D7AA0F0	989.001031446768	Laveggio Settore 4 Zona Tana	Lacustre 1+
10.29.2020	3DD.003D7AA0EF	989.001031446767	Laveggio Settore 4 Zona Tana	Lacustre 1+
10.29.2020	3DD.003D7AA16B	989.001031446891	Laveggio Settore 4 Zona Tana	Lacustre 1+
10.29.2020	3DD.003D7AA159	989.001031446873	Laveggio Settore 4 Zona Tana	Lacustre 1+
10.29.2020	3DD.003D7AA127	989.001031446823	Laveggio Settore 4 Zona Tana	Lacustre 1+
10.29.2020	3DD.003D7AA16D	989.001031446893	Laveggio Settore 4 Zona Tana	Lacustre 1+
10.29.2020	3DD.003D7AA16A	989.001031446890	Laveggio Settore 4 Zona Tana	Lacustre 1+
10.29.2020	3DD.003D7A9D81	989.001031445889	Laveggio settore 4 Zona Tana	Lacustri 2+
10.29.2020	3DD.003D7A9EEC	989.001031446252	Laveggio settore 4 Zona Tana	Lacustri 2+
10.29.2020	3DD.003D7A9E81	989.001031446145	Laveggio settore 4 Zona Tana	Lacustri 2+
10.29.2020	3DD.003D7A9D75	989.001031445877	Laveggio settore 4 Zona Tana	Lacustri 2+
10.29.2020	3DD.003D7A9E68	989.001031446120	Laveggio settore 4 Zona Tana	Lacustri 2+
10.29.2020	3DD.003D7A9D85	989.001031445893	Laveggio settore 4 Zona Tana	Lacustri 2+
10.29.2020	3DD.003D7A9E94	989.001031446164	Laveggio settore 4 Zona Tana	Lacustri 2+
10.29.2020	3DD.003D7A9D62	989.001031445858	Laveggio settore 4 Zona Tana	Lacustri 2+
10.29.2020	3DD.003D7A9D47	989.001031445831	Laveggio settore 4 Zona Tana	Lacustri 2+
10.29.2020	3DD.003D7A9D46	989.001031445830	Laveggio settore 4 Zona Tana	Lacustri 2+
10.29.2020	3DD.003D7A9E6A	989.001031446122	Laveggio settore 4 Zona Tana	Lacustri 2+
10.29.2020	3DD.003D7A9D69	989.001031445865	Laveggio settore 4 Zona Tana	Lacustri 2+
10.29.2020	3DD.003D7A9D3F	989.001031445823	Laveggio settore 4 Zona Tana	Lacustri 2+
10.29.2020	3DD.003D7A9D6F	989.001031445871	Laveggio settore 4 Zona Tana	Lacustri 2+
10.29.2020	3DD.003D7A9D3A	989.001031445818	Laveggio settore 4 Zona Tana	Lacustri 2+
10.29.2020	3DD.003D7A9D5B	989.001031445851	Laveggio settore 4 Zona Tana	Lacustri 2+
10.29.2020	3DD.003D7A9D7C	989.001031445884	Laveggio settore 4 Zona Tana	Lacustri 2+
10.29.2020	3DD.003D7A9D7B	989.001031445883	Laveggio settore 4 Zona Tana	Lacustri 2+
10.29.2020	3DD.003D7A9E63	989.001031446115	Laveggio settore 4 Zona Tana	Lacustri 2+
10.29.2020	3DD.003D7A9EA3	989.001031446179	Laveggio settore 4 Zona Tana	Lacustri 2+
10.29.2020	3DD.003D7A9D86	989.001031445894	Laveggio settore 4 Zona Tana	Lacustri 2+
10.29.2020	3DD.003D7A9D58	989.001031445848	Laveggio settore 4 Zona Tana	Lacustri 2+
10.29.2020	3DD.003D7A9D5A	989.001031445850	Laveggio settore 4 Zona Tana	Lacustri 2+
10.29.2020	3DD.003D7A9E52	989.001031446098	Laveggio settore 4 Zona Tana	Lacustri 2+
10.29.2020	3DD.003D7A9D60	989.001031445856	Laveggio settore 4 Zona Tana	Lacustri 2+
10.29.2020	3DD.003D7A9D64	989.001031445860	Laveggio settore 4 Zona Tana	Lacustri 2+
10.29.2020	3DD.003D7A9D82	989.001031445890	Laveggio settore 4 Zona Tana	Lacustri 2+
10.29.2020	3DD.003D7A9D27	989.001031445799	Laveggio settore 4 Zona Tana	Lacustri 2+
10.29.2020	3DD.003D7A9D6B	989.001031445867	Laveggio settore 4 Zona Tana	Lacustri 2+
10.29.2020	3DD.003D7A9D6C	989.001031445868	Laveggio settore 4 Zona Tana	Lacustri 2+
10.29.2020	3DD.003D7A9D44	989.001031445828	Laveggio settore 4 Zona Tana	Lacustri 2+
10.29.2020	3DD.003D7A9E92	989.001031446162	Laveggio settore 4 Zona Tana	Lacustri 2+
10.29.2020	3DD.003D7A9D51	989.001031445841	Laveggio settore 4 Zona Tana	Lacustri 2+
10.29.2020	3DD.003D7A9D3C	989.001031445820	Laveggio settore 4 Zona Tana	Lacustri 2+
10.29.2020	3DD.003D7A9D4C	989.001031445836	Laveggio settore 4 Zona Tana	Lacustri 2+
10.29.2020	3DD.003D7A9E5B	989.001031446107	Laveggio settore 4 Zona Tana	Lacustri 2+
10.29.2020	3DD.003D7A9D35	989.001031445813	Laveggio settore 4 Zona Tana	Lacustri 2+
10.29.2020	3DD.003D7A9E76	989.001031446134	Laveggio settore 4 Zona Tana	Lacustri 2+
10.29.2020	3DD.003D7A9D49	989.001031445833	Laveggio settore 4 Zona Tana	Lacustri 2+
10.29.2020	3DD.003D7A9D45	989.001031445829	Laveggio settore 4 Zona Tana	Lacustri 2+
10.29.2020	3DD.003D7A9E72	989.001031446130	Laveggio settore 4 Zona Tana	Lacustri 2+
10.29.2020	3DD.003D7A9D4E	989.001031445838	Laveggio settore 4 Zona Tana	Lacustri 2+
10.29.2020	3DD.003D7A9D6E	989.001031445870	Laveggio settore 4 Zona Tana	Lacustri 2+
10.29.2020	3DD.003D7A9D33	989.001031445811	Laveggio settore 4 Zona Tana	Lacustri 2+
10.29.2020	3DD.003D7A9D30	989.001031445808	Laveggio settore 4 Zona Tana	Lacustri 2+
10.29.2020	3DD.003D7A9D70	989.001031445872	Laveggio settore 4 Zona Tana	Lacustri 2+
10.29.2020	3DD.003D7A9D4A	989.001031445834	Laveggio settore 4 Zona Tana	Lacustri 2+
10.29.2020	3DD.003D7A9D3E	989.001031445822	Laveggio settore 4 Zona Tana	Lacustri 2+
10.29.2020	3DD.003D7A9D66	989.001031445862	Laveggio settore 4 Zona Tana	Lacustri 2+
10.29.2020	3DD.003D7A9D77	989.001031445879	Laveggio settore 4 Zona Tana	Lacustri 2+
10.29.2020	3DD.003D7A9E99	989.001031446169	Laveggio settore 4 Zona Tana	Lacustri 2+
10.29.2020	3DD.003D7A9E50	989.001031446096	Laveggio settore 4 Zona Tana	Lacustri 2+
10.29.2020	3DD.003D7A9D6A	989.001031445866	Laveggio settore 4 Zona Tana	Lacustri 2+
10.29.2020	3DD.003D7A9D67	989.001031445863	Laveggio settore 4 Zona Tana	Lacustri 2+
10.29.2020	3DD.003D7A9D7A	989.001031445882	Laveggio settore 4 Zona Tana	Lacustri 2+
10.29.2020	3DD.003D7A9E71	989.001031446129	Laveggio settore 4 Zona Tana	Lacustri 2+
10.29.2020	3DD.003D7A9E54	989.001031446100	Laveggio settore 4 Zona Tana	Lacustri 2+
10.29.2020	3DD.003D7A9D55	989.001031445845	Laveggio settore 4 Zona Tana	Lacustri 2+
10.29.2020	3DD.003D7A9E5C	989.001031446108	Laveggio settore 4 Zona Tana	Lacustri 2+
10.29.2020	3DD.003D7AA0CE	989.001031446734	Laveggio settore 4 Zona Tana	Lacustri 2+
10.29.2020	3DD.003D7A9E82	989.001031446146	Laveggio settore 4 Zona Tana	Lacustri 2+
10.29.2020	3DD.003D7A9E9B	989.001031446171	Laveggio settore 4 Zona Tana	Lacustri 2+
10.29.2020	3DD.003D7A9E7E	989.001031446142	Laveggio settore 4 Zona Tana	Lacustri 2+
10.29.2020	3DD.003D7A9D78	989.001031445880	Laveggio settore 4 Zona Tana	Lacustri 2+
10.29.2020	3DD.003D7A9E64	989.001031446116	Laveggio settore 4 Zona Tana	Lacustri 2+
10.29.2020	3DD.003D7A9D5D	989.001031445853	Laveggio settore 4 Zona Tana	Lacustri 2+
10.29.2020	3DD.003D7A9D6D	989.001031445869	Laveggio settore 4 Zona Tana	Lacustri 2+
10.29.2020	3DD.003D7A9D2E	989.001031445806	Laveggio settore 4 Zona Tana	Lacustri 2+
10.29.2020	3DD.003D7A9D79	989.001031445881	Laveggio settore 4 Zona Tana	Lacustri 2+
10.29.2020	3DD.003D7A9E79	989.001031446137	Laveggio settore 4 Zona Tana	Lacustri 2+
10.29.2020	3DD.003D7A9D34	989.001031445812	Laveggio settore 4 Zona Tana	Lacustri 2+
10.29.2020	3DD.003D7A9D43	989.001031445827	Laveggio settore 4 Zona Tana	Lacustri 2+
10.29.2020	3DD.003D7A9E8A	989.001031446154	Laveggio settore 4 Zona Tana	Lacustri 2+
10.29.2020	3DD.003D7A9D36	989.001031445814	Laveggio settore 4 Zona Tana	Lacustri 2+
10.29.2020	3DD.003D7A9D72	989.001031445874	Laveggio settore 4 Zona Tana	Lacustri 2+
10.29.2020	3DD.003D7A9E8B	989.001031446155	Laveggio settore 4 Zona Tana	Lacustri 2+
10.29.2020	3DD.003D7A9D53	989.001031445843	Laveggio settore 4 Zona Tana	Lacustri 2+
10.29.2020	3DD.003D7A9D57	989.001031445847	Laveggio settore 4 Zona Tana	Lacustri 2+
10.29.2020	3DD.003D7A9D4B	989.001031445835	Laveggio settore 4 Zona Tana	Lacustri 2+
10.29.2020	3DD.003D7A9D7D	989.001031445885	Laveggio settore 4 Zona Tana	Lacustri 2+
10.29.2020	3DD.003D7A9D56	989.001031445846	Laveggio settore 4 Zona Tana	Lacustri 2+
10.29.2020	3DD.003D7A9D39	989.001031445817	Laveggio settore 4 Zona Tana	Lacustri 2+
10.29.2020	3DD.003D7A9E9F	989.001031446175	Laveggio settore 4 Zona Tana	Lacustri 2+
10.29.2020	3DD.003D7A9D5C	989.001031445852	Laveggio settore 4 Zona Tana	Lacustri 2+
10.29.2020	3DD.003D7A9E57	989.001031446103	Laveggio settore 4 Zona Tana	Lacustri 2+
10.29.2020	3DD.003D7A9EA4	989.001031446180	Laveggio settore 4 Zona Tana	Lacustri 2+
10.29.2020	3DD.003D7A9D37	989.001031445815	Laveggio settore 4 Zona Tana	Lacustri 2+
10.29.2020	3DD.003D7A9EE1	989.001031446241	Laveggio settore 4 Zona Tana	Lacustri 2+
10.29.2020	3DD.003D7A9D2A	989.001031445802	Laveggio settore 4 Zona Tana	Lacustri 2+
10.29.2020	3DD.003D7A9E87	989.001031446151	Laveggio settore 4 Zona Tana	Lacustri 2+
10.29.2020	3DD.003D7A9E74	989.001031446132	Laveggio settore 4 Zona Tana	Lacustri 2+
10.29.2020	3DD.003D7A9EB1	989.001031446193	Laveggio settore 4 Zona Tana	Lacustri 2+
10.29.2020	3DD.003D7A9E55	989.001031446101	Laveggio settore 4 Zona Tana	Lacustri 2+
10.29.2020	3DD.003D7A9E66	989.001031446118	Laveggio settore 4 Zona Tana	Lacustri 2+
10.29.2020	3DD.003D7A9E61	989.001031446113	Laveggio settore 4 Zona Tana	Lacustri 2+
10.29.2020	3DD.003D7A9E85	989.001031446149	Laveggio settore 4 Zona Tana	Lacustri 2+
10.29.2020	3DD.003D7A9FE6	989.001031446502	Laveggio settore1 FOCE	Lacustre 1+
10.29.2020	3DD.003D7AA002	989.001031446530	Laveggio settore1 FOCE	Lacustre 1+
10.29.2020	3DD.003D7A9F63	989.001031446371	Laveggio settore1 FOCE	Lacustre 1+
10.29.2020	3DD.003D7A9FCC	989.001031446476	Laveggio settore1 FOCE	Lacustre 1+
10.29.2020	3DD.003D7A9FA9	989.001031446441	Laveggio settore1 FOCE	Lacustre 1+
10.29.2020	3DD.003D7A9FCB	989.001031446475	Laveggio settore1 FOCE	Lacustre 1+
10.29.2020	3DD.003D7A9F83	989.001031446403	Laveggio settore1 FOCE	Lacustre 1+
10.29.2020	3DD.003D7A9F50	989.001031446352	Laveggio settore1 FOCE	Lacustre 1+
10.29.2020	3DD.003D7A9F5B	989.001031446363	Laveggio settore1 FOCE	Lacustre 1+
10.29.2020	3DD.003D7A9FB2	989.001031446450	Laveggio settore1 FOCE	Lacustre 1+
10.29.2020	3DD.003D7A9FC4	989.001031446468	Laveggio settore1 FOCE	Lacustre 1+
10.29.2020	3DD.003D7A9FB7	989.001031446455	Laveggio settore1 FOCE	Lacustre 1+
10.29.2020	3DD.003D7A9F40	989.001031446336	Laveggio settore1 FOCE	Lacustre 1+
10.29.2020	3DD.003D7A9F53	989.001031446355	Laveggio settore1 FOCE	Lacustre 1+
10.29.2020	3DD.003D7AA029	989.001031446569	Laveggio settore1 FOCE	Lacustre 1+
10.29.2020	3DD.003D7A9FBC	989.001031446460	Laveggio settore1 FOCE	Lacustre 1+
10.29.2020	3DD.003D7A9F2E	989.001031446318	Laveggio settore1 FOCE	Lacustre 1+
10.29.2020	3DD.003D7A9F4A	989.001031446346	Laveggio settore1 FOCE	Lacustre 1+
10.29.2020	3DD.003D7A9F18	989.001031446296	Laveggio settore1 FOCE	Lacustre 1+
10.29.2020	3DD.003D7A9FD2	989.001031446482	Laveggio settore1 FOCE	Lacustre 1+
10.29.2020	3DD.003D7A9FC3	989.001031446467	Laveggio settore1 FOCE	Lacustre 1+
10.29.2020	3DD.003D7A9F86	989.001031446406	Laveggio settore1 FOCE	Lacustre 1+
10.29.2020	3DD.003D7A9F5E	989.001031446366	Laveggio settore1 FOCE	Lacustre 1+
10.29.2020	3DD.003D7A9FBB	989.001031446459	Laveggio settore1 FOCE	Lacustre 1+
10.29.2020	3DD.003D7A9FB4	989.001031446452	Laveggio settore1 FOCE	Lacustre 1+
10.29.2020	3DD.003D7A9F23	989.001031446307	Laveggio settore1 FOCE	Lacustre 1+
10.29.2020	3DD.003D7A9FBF	989.001031446463	Laveggio settore1 FOCE	Lacustre 1+
10.29.2020	3DD.003D7A9F51	989.001031446353	Laveggio settore1 FOCE	Lacustre 1+
10.29.2020	3DD.003D7A9F60	989.001031446368	Laveggio settore1 FOCE	Lacustre 1+
10.29.2020	3DD.003D7A9FA2	989.001031446434	Laveggio settore1 FOCE	Lacustre 1+
10.29.2020	3DD.003D7A9FA7	989.001031446439	Laveggio settore1 FOCE	Lacustre 1+
10.29.2020	3DD.003D7A9F9A	989.001031446426	Laveggio settore1 FOCE	Lacustre 1+
10.29.2020	3DD.003D7A9F4B	989.001031446347	Laveggio settore1 FOCE	Lacustre 1+
10.29.2020	3DD.003D7A9FB8	989.001031446456	Laveggio settore1 FOCE	Lacustre 1+
10.29.2020	3DD.003D7A9FD8	989.001031446488	Laveggio settore1 FOCE	Lacustre 1+
10.29.2020	3DD.003D7A9F66	989.001031446374	Laveggio settore1 FOCE	Lacustre 1+
10.29.2020	3DD.003D7A9F9B	989.001031446427	Laveggio settore1 FOCE	Lacustre 1+
10.29.2020	3DD.003D7A9F6B	989.001031446379	Laveggio settore1 FOCE	Lacustre 1+
10.29.2020	3DD.003D7A9F9C	989.001031446428	Laveggio settore1 FOCE	Lacustre 1+
10.29.2020	3DD.003D7A9FD6	989.001031446486	Laveggio settore1 FOCE	Lacustre 1+
10.29.2020	3DD.003D7A9F76	989.001031446390	Laveggio settore1 FOCE	Lacustre 1+
10.29.2020	3DD.003D7A9F3E	989.001031446334	Laveggio settore1 FOCE	Lacustre 1+
10.29.2020	3DD.003D7A9FD0	989.001031446480	Laveggio settore1 FOCE	Lacustre 1+
10.29.2020	3DD.003D7A9FC0	989.001031446464	Laveggio settore1 FOCE	Lacustre 1+
10.29.2020	3DD.003D7A9F4F	989.001031446351	Laveggio settore1 FOCE	Lacustre 1+
10.29.2020	3DD.003D7A9F58	989.001031446360	Laveggio settore1 FOCE	Lacustre 1+
10.29.2020	3DD.003D7A9FA8	989.001031446440	Laveggio settore1 FOCE	Lacustre 1+
10.29.2020	3DD.003D7A9F79	989.001031446393	Laveggio settore1 FOCE	Lacustre 1+
10.29.2020	3DD.003D7A9F95	989.001031446421	Laveggio settore1 FOCE	Lacustre 1+
10.29.2020	3DD.003D7A9FD9	989.001031446489	Laveggio settore1 FOCE	Lacustre 1+
10.29.2020	3DD.003D7A9F70	989.001031446384	Laveggio settore1 FOCE	Lacustre 1+
10.29.2020	3DD.003D7A9F7E	989.001031446398	Laveggio settore1 FOCE	Lacustre 1+
10.29.2020	3DD.003D7A9F7C	989.001031446396	Laveggio settore1 FOCE	Lacustre 1+
10.29.2020	3DD.003D7A9F35	989.001031446325	Laveggio settore1 FOCE	Lacustre 1+
10.29.2020	3DD.003D7A9FAB	989.001031446443	Laveggio settore1 FOCE	Lacustre 1+
10.29.2020	3DD.003D7A9F4C	989.001031446348	Laveggio settore1 FOCE	Lacustre 1+
10.29.2020	3DD.003D7A9F7F	989.001031446399	Laveggio settore1 FOCE	Lacustre 1+
10.29.2020	3DD.003D7A9F46	989.001031446342	Laveggio settore1 FOCE	Lacustre 1+
10.29.2020	3DD.003D7A9F2C	989.001031446316	Laveggio settore1 FOCE	Lacustre 1+
10.29.2020	3DD.003D7A9F81	989.001031446401	Laveggio settore1 FOCE	Lacustre 1+
10.29.2020	3DD.003D7A9F57	989.001031446359	Laveggio settore1 FOCE	Lacustre 1+
10.29.2020	3DD.003D7A9F55	989.001031446357	Laveggio settore1 FOCE	Lacustre 1+
10.29.2020	3DD.003D7A9FD5	989.001031446485	Laveggio settore1 FOCE	Lacustre 1+
10.29.2020	3DD.003D7A9F32	989.001031446322	Laveggio settore1 FOCE	Lacustre 1+
10.29.2020	3DD.003D7A9F2F	989.001031446319	Laveggio settore1 FOCE	Lacustre 1+
10.29.2020	3DD.003D7A9FD4	989.001031446484	Laveggio settore1 FOCE	Lacustre 1+
10.29.2020	3DD.003D7A9F48	989.001031446344	Laveggio settore1 FOCE	Lacustre 1+
10.29.2020	3DD.003D7A9FB1	989.001031446449	Laveggio settore1 FOCE	Lacustre 1+
10.29.2020	3DD.003D7A9F19	989.001031446297	Laveggio settore1 FOCE	Lacustre 1+
10.29.2020	3DD.003D7A9F20	989.001031446304	Laveggio settore1 FOCE	Lacustre 1+
10.29.2020	3DD.003D7A9F6F	989.001031446383	Laveggio settore1 FOCE	Lacustre 1+
10.29.2020	3DD.003D7A9FC8	989.001031446472	Laveggio settore1 FOCE	Lacustre 1+
10.29.2020	3DD.003D7A9F33	989.001031446323	Laveggio settore1 FOCE	Lacustre 1+
10.29.2020	3DD.003D7A9F88	989.001031446408	Laveggio settore1 FOCE	Lacustre 1+
10.29.2020	3DD.003D7A9F6E	989.001031446382	Laveggio settore1 FOCE	Lacustre 1+
10.29.2020	3DD.003D7A9FC2	989.001031446466	Laveggio settore1 FOCE	Lacustre 1+
10.29.2020	3DD.003D7A9F3D	989.001031446333	Laveggio settore1 FOCE	Lacustre 1+
10.29.2020	3DD.003D7A9F65	989.001031446373	Laveggio settore1 FOCE	Lacustre 1+
10.29.2020	3DD.003D7A9FDD	989.001031446493	Laveggio settore1 FOCE	Lacustre 1+
10.29.2020	3DD.003D7A9FDB	989.001031446491	Laveggio settore1 FOCE	Lacustre 1+
10.29.2020	3DD.003D7A9F54	989.001031446356	Laveggio settore1 FOCE	Lacustre 1+
10.29.2020	3DD.003D7A9F8E	989.001031446414	Laveggio settore1 FOCE	Lacustre 1+
10.29.2020	3DD.003D7A9F43	989.001031446339	Laveggio settore1 FOCE	Lacustre 1+
10.29.2020	3DD.003D7A9FAA	989.001031446442	Laveggio settore1 FOCE	Lacustre 1+
10.29.2020	3DD.003D7A9F52	989.001031446354	Laveggio settore1 FOCE	Lacustre 1+
10.29.2020	3DD.003D7A9F5A	989.001031446362	Laveggio settore1 FOCE	Lacustre 1+
10.29.2020	3DD.003D7A9FA1	989.001031446433	Laveggio settore1 FOCE	Lacustre 1+
10.29.2020	3DD.003D7A9F8F	989.001031446415	Laveggio settore1 FOCE	Lacustre 1+
10.29.2020	3DD.003D7A9F62	989.001031446370	Laveggio settore1 FOCE	Lacustre 1+
10.29.2020	3DD.003D7A9F97	989.001031446423	Laveggio settore1 FOCE	Lacustre 1+
10.29.2020	3DD.003D7A9E18	989.001031446040	Laveggio settore1 FOCE	Lacustre 2+
10.29.2020	3DD.003D7A9E3A	989.001031446074	Laveggio settore1 FOCE	Lacustre 2+
10.29.2020	3DD.003D7A9DFD	989.001031446013	Laveggio settore1 FOCE	Lacustre 2+
10.29.2020	3DD.003D7A9E2F	989.001031446063	Laveggio settore1 FOCE	Lacustre 2+
10.29.2020	3DD.003D7A9E02	989.001031446018	Laveggio settore1 FOCE	Lacustre 2+
10.29.2020	3DD.003D7A9E36	989.001031446070	Laveggio settore1 FOCE	Lacustre 2+
10.29.2020	3DD.003D7A9E06	989.001031446022	Laveggio settore1 FOCE	Lacustre 2+
10.29.2020	3DD.003D7A9E35	989.001031446069	Laveggio settore1 FOCE	Lacustre 2+
10.29.2020	3DD.003D7A9E13	989.001031446035	Laveggio settore1 FOCE	Lacustre 2+
10.29.2020	3DD.003D7A9E3D	989.001031446077	Laveggio settore1 FOCE	Lacustre 2+
10.29.2020	3DD.003D7A9E26	989.001031446054	Laveggio settore1 FOCE	Lacustre 2+
10.29.2020	3DD.003D7A9DFE	989.001031446014	Laveggio settore1 FOCE	Lacustre 2+
10.29.2020	3DD.003D7A9E31	989.001031446065	Laveggio settore1 FOCE	Lacustre 2+
10.29.2020	3DD.003D7A9DF1	989.001031446001	Laveggio settore1 FOCE	Lacustre 2+
10.29.2020	3DD.003D7A9E00	989.001031446016	Laveggio settore1 FOCE	Lacustre 2+
10.29.2020	3DD.003D7A9E0A	989.001031446026	Laveggio settore1 FOCE	Lacustre 2+
10.29.2020	3DD.003D7A9E11	989.001031446033	Laveggio settore1 FOCE	Lacustre 2+
10.29.2020	3DD.003D7A9E2E	989.001031446062	Laveggio settore1 FOCE	Lacustre 2+
10.29.2020	3DD.003D7A9DF0	989.001031446000	Laveggio settore1 FOCE	Lacustre 2+
10.29.2020	3DD.003D7A9E3B	989.001031446075	Laveggio settore1 FOCE	Lacustre 2+
10.29.2020	3DD.003D7A9E40	989.001031446080	Laveggio settore1 FOCE	Lacustre 2+
10.29.2020	3DD.003D7A9DFF	989.001031446015	Laveggio settore1 FOCE	Lacustre 2+
10.29.2020	3DD.003D7A9E0D	989.001031446029	Laveggio settore1 FOCE	Lacustre 2+
10.29.2020	3DD.003D7A9E2B	989.001031446059	Laveggio settore1 FOCE	Lacustre 2+
10.29.2020	3DD.003D7A9DED	989.001031445997	Laveggio settore1 FOCE	Lacustre 2+
10.29.2020	3DD.003D7A9DFC	989.001031446012	Laveggio settore1 FOCE	Lacustre 2+
10.29.2020	3DD.003D7A9DF2	989.001031446002	Laveggio settore1 FOCE	Lacustre 2+
10.29.2020	3DD.003D7A9E3C	989.001031446076	Laveggio settore1 FOCE	Lacustre 2+
10.29.2020	3DD.003D7A9DFA	989.001031446010	Laveggio settore1 FOCE	Lacustre 2+
10.29.2020	3DD.003D7A9E4F	989.001031446095	Laveggio settore1 FOCE	Lacustre 2+
10.29.2020	3DD.003D7A9E45	989.001031446085	Laveggio settore1 FOCE	Lacustre 2+
10.29.2020	3DD.003D7A9E30	989.001031446064	Laveggio settore1 FOCE	Lacustre 2+
10.29.2020	3DD.003D7A9E07	989.001031446023	Laveggio settore1 FOCE	Lacustre 2+
10.29.2020	3DD.003D7A9E3F	989.001031446079	Laveggio settore1 FOCE	Lacustre 2+
10.29.2020	3DD.003D7A9E39	989.001031446073	Laveggio settore1 FOCE	Lacustre 2+
10.29.2020	3DD.003D7A9E3E	989.001031446078	Laveggio settore1 FOCE	Lacustre 2+
10.29.2020	3DD.003D7A9E4A	989.001031446090	Laveggio settore1 FOCE	Lacustre 2+
10.29.2020	3DD.003D7A9E21	989.001031446049	Laveggio settore1 FOCE	Lacustre 2+
10.29.2020	3DD.003D7A9E32	989.001031446066	Laveggio settore1 FOCE	Lacustre 2+
10.29.2020	3DD.003D7A9DEF	989.001031445999	Laveggio settore1 FOCE	Lacustre 2+
10.29.2020	3DD.003D7A9E2D	989.001031446061	Laveggio settore1 FOCE	Lacustre 2+
10.29.2020	3DD.003D7A9E0B	989.001031446027	Laveggio settore1 FOCE	Lacustre 2+
10.29.2020	3DD.003D7A9E14	989.001031446036	Laveggio settore1 FOCE	Lacustre 2+
10.29.2020	3DD.003D7A9E4E	989.001031446094	Laveggio settore1 FOCE	Lacustre 2+
10.29.2020	3DD.003D7A9DF3	989.001031446003	Laveggio settore1 FOCE	Lacustre 2+
10.29.2020	3DD.003D7A9E47	989.001031446087	Laveggio settore1 FOCE	Lacustre 2+
10.29.2020	3DD.003D7A9DF4	989.001031446004	Laveggio settore1 FOCE	Lacustre 2+
10.29.2020	3DD.003D7A9E20	989.001031446048	Laveggio settore1 FOCE	Lacustre 2+
10.29.2020	3DD.003D7A9DFB	989.001031446011	Laveggio settore1 FOCE	Lacustre 2+
10.29.2020	3DD.003D7A9E10	989.001031446032	Laveggio settore1 FOCE	Lacustre 2+
10.29.2020	3DD.003D7A9E0E	989.001031446030	Laveggio settore1 FOCE	Lacustre 2+
10.29.2020	3DD.003D7A9E04	989.001031446020	Laveggio settore1 FOCE	Lacustre 2+
10.29.2020	3DD.003D7A9DF7	989.001031446007	Laveggio settore1 FOCE	Lacustre 2+
10.29.2020	3DD.003D7A9E05	989.001031446021	Laveggio settore1 FOCE	Lacustre 2+
10.29.2020	3DD.003D7A9DF6	989.001031446006	Laveggio settore1 FOCE	Lacustre 2+
10.29.2020	3DD.003D7A9E16	989.001031446038	Laveggio settore1 FOCE	Lacustre 2+
10.29.2020	3DD.003D7A9E1F	989.001031446047	Laveggio settore1 FOCE	Lacustre 2+
10.29.2020	3DD.003D7A9E34	989.001031446068	Laveggio settore1 FOCE	Lacustre 2+
10.29.2020	3DD.003D7A9E15	989.001031446037	Laveggio settore1 FOCE	Lacustre 2+
10.29.2020	3DD.003D7A9E46	989.001031446086	Laveggio settore1 FOCE	Lacustre 2+
10.29.2020	3DD.003D7A9DEC	989.001031445996	Laveggio settore1 FOCE	Lacustre 2+
10.29.2020	3DD.003D7A9DF9	989.001031446009	Laveggio settore1 FOCE	Lacustre 2+
10.29.2020	3DD.003D7A9E17	989.001031446039	Laveggio settore1 FOCE	Lacustre 2+
10.29.2020	3DD.003D7A9E03	989.001031446019	Laveggio settore1 FOCE	Lacustre 2+
10.29.2020	3DD.003D7A9E0C	989.001031446028	Laveggio settore1 FOCE	Lacustre 2+
10.29.2020	3DD.003D7A9E12	989.001031446034	Laveggio settore1 FOCE	Lacustre 2+
10.29.2020	3DD.003D7A9E4D	989.001031446093	Laveggio settore1 FOCE	Lacustre 2+
10.29.2020	3DD.003D7A9DF5	989.001031446005	Laveggio settore1 FOCE	Lacustre 2+
10.29.2020	3DD.003D7A9E2A	989.001031446058	Laveggio settore1 FOCE	Lacustre 2+
10.29.2020	3DD.003D7A9E49	989.001031446089	Laveggio settore1 FOCE	Lacustre 2+
10.29.2020	3DD.003D7A9E23	989.001031446051	Laveggio settore1 FOCE	Lacustre 2+
10.29.2020	3DD.003D7A9E48	989.001031446088	Laveggio settore1 FOCE	Lacustre 2+
10.29.2020	3DD.003D7A9E2C	989.001031446060	Laveggio settore1 FOCE	Lacustre 2+
10.29.2020	3DD.003D7A9E33	989.001031446067	Laveggio settore1 FOCE	Lacustre 2+
10.29.2020	3DD.003D7A9E42	989.001031446082	Laveggio settore1 FOCE	Lacustre 2+
10.29.2020	3DD.003D7A9E24	989.001031446052	Laveggio settore1 FOCE	Lacustre 2+
10.29.2020	3DD.003D7A9E09	989.001031446025	Laveggio settore1 FOCE	Lacustre 2+
10.29.2020	3DD.003D7A9E0F	989.001031446031	Laveggio settore1 FOCE	Lacustre 2+
10.29.2020	3DD.003D7A9E01	989.001031446017	Laveggio settore1 FOCE	Lacustre 2+
10.29.2020	3DD.003D7A9E41	989.001031446081	Laveggio settore1 FOCE	Lacustre 2+
10.29.2020	3DD.003D7A9DE3	989.001031445987	Laveggio settore1 FOCE	Lacustre 2+
10.29.2020	3DD.003D7A9DB2	989.001031445938	Laveggio settore1 FOCE	Lacustre 2+
10.29.2020	3DD.003D7A9DC9	989.001031445961	Laveggio settore1 FOCE	Lacustre 2+
10.29.2020	3DD.003D7A9F1D	989.001031446301	Laveggio settore 2 Serre Oberti	Lacustre 1+
10.29.2020	3DD.003D7A9F74	989.001031446388	Laveggio settore 2 Serre Oberti	Lacustre 1+
10.29.2020	3DD.003D7A9F3F	989.001031446335	Laveggio settore 2 Serre Oberti	Lacustre 1+
10.29.2020	3DD.003D7A9F90	989.001031446416	Laveggio settore 2 Serre Oberti	Lacustre 1+
10.29.2020	3DD.003D7A9F6D	989.001031446381	Laveggio settore 2 Serre Oberti	Lacustre 1+
10.29.2020	3DD.003D7A9F24	989.001031446308	Laveggio settore 2 Serre Oberti	Lacustre 1+
10.29.2020	3DD.003D7A9F4D	989.001031446349	Laveggio settore 2 Serre Oberti	Lacustre 1+
10.29.2020	3DD.003D7A9F77	989.001031446391	Laveggio settore 2 Serre Oberti	Lacustre 1+
10.29.2020	3DD.003D7A9FA3	989.001031446435	Laveggio settore 2 Serre Oberti	Lacustre 1+
10.29.2020	3DD.003D7A9F34	989.001031446324	Laveggio settore 2 Serre Oberti	Lacustre 1+
10.29.2020	3DD.003D7A9FC1	989.001031446465	Laveggio settore 2 Serre Oberti	Lacustre 1+
10.29.2020	3DD.003D7A9F49	989.001031446345	Laveggio settore 2 Serre Oberti	Lacustre 1+
10.29.2020	3DD.003D7A9F75	989.001031446389	Laveggio settore 2 Serre Oberti	Lacustre 1+
10.29.2020	3DD.003D7A9F7D	989.001031446397	Laveggio settore 2 Serre Oberti	Lacustre 1+
10.29.2020	3DD.003D7A9F37	989.001031446327	Laveggio settore 2 Serre Oberti	Lacustre 1+
10.29.2020	3DD.003D7A9F8A	989.001031446410	Laveggio settore 2 Serre Oberti	Lacustre 1+
10.29.2020	3DD.003D7AA025	989.001031446565	Laveggio settore 2 Serre Oberti	Lacustre 1+
10.29.2020	3DD.003D7AA037	989.001031446583	Laveggio settore 2 Serre Oberti	Lacustre 1+
10.29.2020	3DD.003D7A9DA3	989.001031445923	Laveggio settore 2 Serre Oberti	Lacustre 2+
10.29.2020	3DD.003D7A9DD4	989.001031445972	Laveggio settore 2 Serre Oberti	Lacustre 2+
10.29.2020	3DD.003D7A9D9C	989.001031445916	Laveggio settore 2 Serre Oberti	Lacustre 2+
10.29.2020	3DD.003D7A9D8F	989.001031445903	Laveggio settore 2 Serre Oberti	Lacustre 2+
10.29.2020	3DD.003D7A9DA2	989.001031445922	Laveggio settore 2 Serre Oberti	Lacustre 2+
10.29.2020	3DD.003D7A9DC7	989.001031445959	Laveggio settore 2 Serre Oberti	Lacustre 2+
10.29.2020	3DD.003D7A9DAB	989.001031445931	Laveggio settore 2 Serre Oberti	Lacustre 2+
10.29.2020	3DD.003D7A9DCD	989.001031445965	Laveggio settore 2 Serre Oberti	Lacustre 2+
10.29.2020	3DD.003D7A9DDE	989.001031445982	Laveggio settore 2 Serre Oberti	Lacustre 2+
10.29.2020	3DD.003D7A9D8A	989.001031445898	Laveggio settore 2 Serre Oberti	Lacustre 2+
10.29.2020	3DD.003D7A9DC6	989.001031445958	Laveggio settore 2 Serre Oberti	Lacustre 2+
10.29.2020	3DD.003D7A9DB7	989.001031445943	Laveggio settore 2 Serre Oberti	Lacustre 2+
10.29.2020	3DD.003D7A9D8D	989.001031445901	Laveggio settore 2 Serre Oberti	Lacustre 2+
10.29.2020	3DD.003D7A9DB5	989.001031445941	Laveggio settore 2 Serre Oberti	Lacustre 2+
10.29.2020	3DD.003D7A9DE2	989.001031445986	Laveggio settore 2 Serre Oberti	Lacustre 2+
10.29.2020	3DD.003D7A9DA6	989.001031445926	Laveggio settore 2 Serre Oberti	Lacustre 2+
10.29.2020	3DD.003D7A9DAC	989.001031445932	Laveggio settore 2 Serre Oberti	Lacustre 2+
10.29.2020	3DD.003D7A9DA5	989.001031445925	Laveggio settore 2 Serre Oberti	Lacustre 2+
10.29.2020	3DD.003D7A9DE8	989.001031445992	Laveggio settore 2 Serre Oberti	Lacustre 2+
10.29.2020	3DD.003D7A9DD0	989.001031445968	Laveggio settore 2 Serre Oberti	Lacustre 2+
10.29.2020	3DD.003D7A9DE7	989.001031445991	Laveggio settore 2 Serre Oberti	Lacustre 2+
10.29.2020	3DD.003D7A9D95	989.001031445909	Laveggio settore 2 Serre Oberti	Lacustre 2+
10.29.2020	3DD.003D7A9DD7	989.001031445975	Laveggio settore 2 Serre Oberti	Lacustre 2+
10.29.2020	3DD.003D7A9FBD	989.001031446461	Laveggio settore 2 Serre Oberti	Lacustre 2+
10.29.2020	3DD.003D7A9FA0	989.001031446432	Laveggio settore 2 Serre Oberti	Lacustre 2+
10.29.2020	3DD.003D7A9FDE	989.001031446494	Laveggio settore 2 Serre Oberti	Lacustre 2+
10.29.2020	3DD.003D7A9FF8	989.001031446520	Laveggio settore 3 Penate	Lacustre 1+
10.29.2020	3DD.003D7AA01F	989.001031446559	Laveggio settore 3 Penate	Lacustre 1+
10.29.2020	3DD.003D7AA0C9	989.001031446729	Laveggio settore 3 Penate	Lacustre 1+
10.29.2020	3DD.003D7AA0EE	989.001031446766	Laveggio settore 3 Penate	Lacustre 1+
10.29.2020	3DD.003D7AA0FB	989.001031446779	Laveggio settore 3 Penate	Lacustre 1+
10.29.2020	3DD.003D7AA0B2	989.001031446706	Laveggio settore 3 Penate	Lacustre 1+
10.29.2020	3DD.003D7A9EF9	989.001031446265	Laveggio settore 3 Penate	Lacustri 2+
10.29.2020	3DD.003D7A9D68	989.001031445864	Laveggio settore 3 Penate	Lacustri 2+
10.29.2020	3DD.003D7A9E6D	989.001031446125	Laveggio settore 3 Penate	Lacustri 2+
10.29.2020	3DD.003D7A9EE9	989.001031446249	Laveggio settore 3 Penate	Lacustri 2+
10.29.2020	3DD.003D7A9EAC	989.001031446188	Laveggio settore 3 Penate	Lacustri 2+
10.29.2020	3DD.003D7A9E8C	989.001031446156	Laveggio settore 3 Penate	Lacustri 2+
10.29.2020	3DD.003D7A9ED4	989.001031446228	Laveggio settore 3 Penate	Lacustri 2+
10.29.2020	3DD.003D7A9F01	989.001031446273	Laveggio settore 3 Penate	Lacustri 2+
10.29.2020	3DD.003D7AA055	989.001031446613	Laveggio settore 3 Penate	Lacustri 2+
10.29.2020	3DD.003D7A9E9C	989.001031446172	Laveggio settore 3 Penate	Lacustri 2+
10.29.2020	3DD.003D7AA15F	989.001031446879	Laveggio settore 3 Penate	Lacustri 2+
10.29.2020	3DD.003D7AA0B6	989.001031446710	Laveggio settore 3 Penate	Lacustri 2+
10.29.2020	3DD.003D7AA116	989.001031446806	Laveggio settore 3 Penate	Lacustri 2+
10.29.2020	3DD.003D7AA118	989.001031446808	Laveggio settore 3 Penate	Lacustri 2+
10.29.2020	3DD.003D7A9EC8	989.001031446216	Laveggio settore 4 Zona Tana	Lacustri 2+
10.29.2020	3DD.003D7A9E51	989.001031446097	Laveggio settore 4 Zona Tana	Lacustri 2+
10.29.2020	3DD.003D7A9D25	989.001031445797	Laveggio settore 4 Zona Tana	Lacustri 2+
10.29.2020	3DD.003D7A9E67	989.001031446119	Laveggio settore 4 Zona Tana	Lacustri 2+
10.29.2020	3DD.003D7A9F1C	989.001031446300	Laveggio settore1 FOCE	Lacustre 1+
10.29.2020	3DD.003D7A9F72	989.001031446386	Laveggio settore1 FOCE	Lacustre 1+
10.29.2020	3DD.003D7A9FAF	989.001031446447	Laveggio settore1 FOCE	Lacustre 1+
10.29.2020	3DD.003D7A9F5C	989.001031446364	Laveggio settore1 FOCE	Lacustre 1+
10.29.2020	3DD.003D7A9F21	989.001031446305	Laveggio settore1 FOCE	Lacustre 1+
10.29.2020	3DD.003D7A9F45	989.001031446341	Laveggio settore1 FOCE	Lacustre 1+
10.29.2020	3DD.003D7A9FA6	989.001031446438	Laveggio settore1 FOCE	Lacustre 1+
10.29.2020	3DD.003D7A9F31	989.001031446321	Laveggio settore1 FOCE	Lacustre 1+
10.29.2020	3DD.003D7A9F8D	989.001031446413	Laveggio settore1 FOCE	Lacustre 1+
10.29.2020	3DD.003D7A9F68	989.001031446376	Laveggio settore1 FOCE	Lacustre 1+
10.29.2020	3DD.003D7A9E27	989.001031446055	Laveggio settore1 FOCE	Lacustre 2+
10.29.2020	3DD.003D7A9E4B	989.001031446091	Laveggio settore1 FOCE	Lacustre 2+
10.29.2020	3DD.003D7A9E25	989.001031446053	Laveggio settore1 FOCE	Lacustre 2+
10.29.2020	3DD.003D7A9E19	989.001031446041	Laveggio settore1 FOCE	Lacustre 2+
10.29.2020	3DD.003D7A9E37	989.001031446071	Laveggio settore1 FOCE	Lacustre 2+
10.29.2020	3DD.003D7A9E28	989.001031446056	Laveggio settore1 FOCE	Lacustre 2+
10.29.2020	3DD.003D7A9E44	989.001031446084	Laveggio settore1 FOCE	Lacustre 2+
10.29.2020	3DD.003D7A9E38	989.001031446072	Laveggio settore1 FOCE	Lacustre 2+
10.29.2020	3DD.003D7A9E4C	989.001031446092	Laveggio settore1 FOCE	Lacustre 2+
10.29.2020	3DD.003D7A9DEB	989.001031445995	Laveggio settore1 FOCE	Lacustre 2+
10.29.2020	3DD.003D7A9E1A	989.001031446042	Laveggio settore1 FOCE	Lacustre 2+
10.29.2020	3DD.003D7A9E1B	989.001031446043	Laveggio settore1 FOCE	Lacustre 2+
10.29.2020	3DD.003D7A9E1C	989.001031446044	Laveggio settore1 FOCE	Lacustre 2+
10.29.2020	3DD.003D7A9DF8	989.001031446008	Laveggio settore1 FOCE	Lacustre 2+
10.29.2020	3DD.003D7A9E22	989.001031446050	Laveggio settore1 FOCE	Lacustre 2+
10.29.2020	3DD.003D7A9E29	989.001031446057	Laveggio settore1 FOCE	Lacustre 2+
10.29.2021	1	989.001039770452	settore 1 foce	Lacustre 1+
10.29.2021	1	989.001039769818	settore 1 foce	Lacustre 1+
10.29.2021	1	989.001039770487	settore 1 foce	Lacustre 1+
10.29.2021	1	989.001039769829	settore 1 foce	Lacustre 1+
10.29.2021	1	989.001039770477	settore 1 foce	Lacustre 1+
10.29.2021	1	989.001039769835	settore 1 foce	Lacustre 1+
10.29.2021	1	989.001039769808	settore 1 foce	Lacustre 1+
10.29.2021	1	989.001039769812	settore 1 foce	Lacustre 1+
10.29.2021	1	989.001039770462	settore 1 foce	Lacustre 1+
10.29.2021	1	989.001039769834	settore 1 foce	Lacustre 1+
10.29.2021	1	989.001039770408	settore 1 foce	Lacustre 1+
10.29.2021	1	989.001039769809	settore 1 foce	Lacustre 1+
10.29.2021	1	989.001039770445	settore 1 foce	Lacustre 1+
10.29.2021	1	989.001039770483	settore 1 foce	Lacustre 1+
10.29.2021	1	989.001039769790	settore 1 foce	Lacustre 1+
10.29.2021	1	989.001039770484	settore 1 foce	Lacustre 1+
10.29.2021	1	989.001039769803	settore 1 foce	Lacustre 1+
10.29.2021	1	989.001039770414	settore 1 foce	Lacustre 1+
10.29.2021	1	989.001039769865	settore 1 foce	Lacustre 1+
10.29.2021	1	989.001039770397	settore 1 foce	Lacustre 1+
10.29.2021	1	989.001039770435	settore 1 foce	Lacustre 1+
10.29.2021	1	989.001039769815	settore 1 foce	Lacustre 1+
10.29.2021	1	989.001039770485	settore 1 foce	Lacustre 1+
10.29.2021	1	989.001039769821	settore 1 foce	Lacustre 1+
10.29.2021	1	989.001039770404	settore 1 foce	Lacustre 1+
10.29.2021	1	989.001039770444	settore 1 foce	Lacustre 1+
10.29.2021	1	989.001039769882	settore 1 foce	Lacustre 1+
10.29.2021	1	989.001039770424	settore 1 foce	Lacustre 1+
10.29.2021	1	989.001039769869	settore 1 foce	Lacustre 1+
10.29.2021	1	989.001039770468	settore 1 foce	Lacustre 1+
10.29.2021	1	989.001039769874	settore 1 foce	Lacustre 1+
10.29.2021	1	989.001039769816	settore 1 foce	Lacustre 1+
10.29.2021	1	989.001039770413	settore 1 foce	Lacustre 1+
10.29.2021	1	989.001039769817	settore 1 foce	Lacustre 1+
10.29.2021	1	989.001039770431	settore 1 foce	Lacustre 1+
10.29.2021	1	989.001039770422	settore 1 foce	Lacustre 1+
10.29.2021	1	989.001039769823	settore 1 foce	Lacustre 1+
10.29.2021	1	989.001039770403	settore 1 foce	Lacustre 1+
10.29.2021	1	989.001039769869	settore 1 foce	Lacustre 1+
10.29.2021	1	989.001039770460	settore 1 foce	Lacustre 1+
10.29.2021	1	989.001039770426	settore 1 foce	Lacustre 1+
10.29.2021	1	989.001039770454	settore 1 foce	Lacustre 1+
10.29.2021	1	989.001039770464	settore 1 foce	Lacustre 1+
10.29.2021	1	989.001039769826	settore 1 foce	Lacustre 1+
10.29.2021	1	989.001039770476	settore 1 foce	Lacustre 1+
10.29.2021	1	989.001039769841	settore 1 foce	Lacustre 1+
10.29.2021	1	989.001039770428	settore 1 foce	Lacustre 1+
10.29.2021	1	989.001039770458	settore 1 foce	Lacustre 1+
10.29.2021	1	989.001039769844	settore 1 foce	Lacustre 1+
10.29.2021	1	989.001039770467	settore 1 foce	Lacustre 1+
10.29.2021	1	989.001039769791	settore 1 foce	Lacustre 1+
10.29.2021	1	989.001039770456	settore 1 foce	Lacustre 1+
10.29.2021	1	989.001039769863	settore 1 foce	Lacustre 1+
10.29.2021	1	989.001039770434	settore 1 foce	Lacustre 1+
10.29.2021	1	989.001039769806	settore 1 foce	Lacustre 1+
10.29.2021	1	989.001039770479	settore 1 foce	Lacustre 1+
10.29.2021	1	989.001039770480	settore 1 foce	Lacustre 1+
10.29.2021	1	989.001039770409	settore 1 foce	Lacustre 1+
10.29.2021	1	989.001039769827	settore 1 foce	Lacustre 1+
10.29.2021	1	989.001039770442	settore 1 foce	Lacustre 1+
10.29.2021	1	989.001039770463	settore 1 foce	Lacustre 1+
10.29.2021	1	989.001039769839	settore 1 foce	Lacustre 1+
10.29.2021	1	989.001039770398	settore 1 foce	Lacustre 1+
10.29.2021	1	989.001039769805	settore 1 foce	Lacustre 1+
10.29.2021	1	989.001039769852	settore 1 foce	Lacustre 1+
10.29.2021	1	989.001039770436	settore 1 foce	Lacustre 1+
10.29.2021	1	989.001039770399	settore 1 foce	Lacustre 1+
10.29.2021	1	989.001039769825	settore 1 foce	Lacustre 1+
10.29.2021	1	989.001039770440	settore 1 foce	Lacustre 1+
10.29.2021	1	989.001039769883	settore 1 foce	Lacustre 1+
10.29.2021	1	989.001039770457	settore 1 foce	Lacustre 1+
10.29.2021	1	989.001039769868	settore 1 foce	Lacustre 1+
10.29.2021	1	989.001039770478	settore 1 foce	Lacustre 1+
10.29.2021	1	989.001039770438	settore 1 foce	Lacustre 1+
10.29.2021	1	989.001039769796	settore 1 foce	Lacustre 1+
10.29.2021	1	989.001039770407	settore 1 foce	Lacustre 1+
10.29.2021	1	989.001039769867	settore 1 foce	Lacustre 1+
10.29.2021	1	989.001039770466	settore 1 foce	Lacustre 1+
10.29.2021	1	989.001039769862	settore 1 foce	Lacustre 1+
10.29.2021	1	989.001039770470	settore 1 foce	Lacustre 1+
10.29.2021	1	989.001039769837	settore 1 foce	Lacustre 1+
10.29.2021	1	989.001039770447	settore 1 foce	Lacustre 1+
10.29.2021	1	989.001039770465	settore 1 foce	Lacustre 1+
10.29.2021	1	989.001039769847	settore 1 foce	Lacustre 1+
10.29.2021	1	989.001039770411	settore 1 foce	Lacustre 1+
10.29.2021	1	989.001039769845	settore 1 foce	Lacustre 1+
10.29.2021	1	989.001039770441	settore 1 foce	Lacustre 1+
10.29.2021	1	989.001039769850	settore 1 foce	Lacustre 1+
10.29.2021	1	989.001039770475	settore 1 foce	Lacustre 1+
10.29.2021	1	989.001039770401	settore 1 foce	Lacustre 1+
10.29.2021	1	989.001039769792	settore 1 foce	Lacustre 1+
10.29.2021	1	989.001039770418	settore 1 foce	Lacustre 1+
10.29.2021	1	989.001039769831	settore 1 foce	Lacustre 1+
10.29.2021	1	989.001039769820	settore 1 foce	Lacustre 1+
10.29.2021	1	989.001039770396	settore 1 foce	Lacustre 1+
10.29.2021	1	989.001039769810	settore 1 foce	Lacustre 1+
10.29.2021	1	989.001039770489	settore 1 foce	Lacustre 1+
10.29.2021	1	989.001039769840	settore 1 foce	Lacustre 1+
10.29.2021	1	989.001039770473	settore 1 foce	Lacustre 1+
10.29.2021	1	989.001039769832	settore 1 foce	Lacustre 1+
10.29.2021	1	989.001039770391	settore 1 foce	Lacustre 1+
10.29.2021	1	989.001039769838	settore 1 foce	Lacustre 1+
10.29.2021	1	989.001039769881	settore 2 serre oberti	Lacustre 1+
10.29.2021	1	989.001039770486	settore 2 serre oberti	Lacustre 1+
10.29.2021	1	989.001039769875	settore 2 serre oberti	Lacustre 1+
10.29.2021	1	989.001039770412	settore 2 serre oberti	Lacustre 1+
10.29.2021	1	989.001039769873	settore 2 serre oberti	Lacustre 1+
10.29.2021	1	989.001039770451	settore 2 serre oberti	Lacustre 1+
10.29.2021	1	989.001039769858	settore 2 serre oberti	Lacustre 1+
10.29.2021	1	989.001039770390	settore 2 serre oberti	Lacustre 1+
10.29.2021	1	989.001039770471	settore 2 serre oberti	Lacustre 1+
10.29.2021	1	989.001039769819	settore 2 serre oberti	Lacustre 1+
10.29.2021	1	989.001039770455	settore 2 serre oberti	Lacustre 1+
10.29.2021	1	989.001039769857	settore 2 serre oberti	Lacustre 1+
10.29.2021	1	989.001039770472	settore 2 serre oberti	Lacustre 1+
10.29.2021	1	989.001039769804	settore 2 serre oberti	Lacustre 1+
10.29.2021	1	989.001039770488	settore 2 serre oberti	Lacustre 1+
10.29.2021	1	989.001039770415	settore 2 serre oberti	Lacustre 1+
10.29.2021	1	989.001039769876	settore 2 serre oberti	Lacustre 1+
10.29.2021	1	989.001039770430	settore 2 serre oberti	Lacustre 1+
10.29.2021	1	989.001039770482	settore 2 serre oberti	Lacustre 1+
10.29.2021	1	989.001039769801	settore 2 serre oberti	Lacustre 1+
10.29.2021	1	989.001039770448	settore 2 serre oberti	Lacustre 1+
10.29.2021	1	989.001039769833	settore 2 serre oberti	Lacustre 1+
10.29.2021	1	989.001039770449	settore 2 serre oberti	Lacustre 1+
10.29.2021	1	989.001039769807	settore 2 serre oberti	Lacustre 1+
10.29.2021	1	989.001039770474	settore 2 serre oberti	Lacustre 1+
10.29.2021	1	989.001039770443	settore 2 serre oberti	Lacustre 1+
10.29.2021	1	989.001039770402	settore 2 serre oberti	Lacustre 1+
10.29.2021	1	989.001039769798	settore 2 serre oberti	Lacustre 1+
10.29.2021	1	989.001039770416	settore 2 serre oberti	Lacustre 1+
10.29.2021	1	989.001039770406	settore 2 serre oberti	Lacustre 1+
10.29.2021	1	989.001039769859	settore 2 serre oberti	Lacustre 1+
10.29.2021	1	989.001039770393	settore 2 serre oberti	Lacustre 1+
10.29.2021	1	989.001039769797	settore 2 serre oberti	Lacustre 1+
10.29.2021	1	989.001039770400	settore 2 serre oberti	Lacustre 1+
10.29.2021	1	989.001039770437	settore 2 serre oberti	Lacustre 1+
10.29.2021	1	989.001039769866	settore 2 serre oberti	Lacustre 1+
10.29.2021	1	989.001039770392	settore 2 serre oberti	Lacustre 1+
10.29.2021	1	989.001039769849	settore 2 serre oberti	Lacustre 1+
10.29.2021	1	989.001039770446	settore 2 serre oberti	Lacustre 1+
10.29.2021	1	989.001039769799	settore 2 serre oberti	Lacustre 1+
10.29.2021	1	989.001039770420	settore 2 serre oberti	Lacustre 1+
10.29.2021	1	989.001039769886	settore 2 serre oberti	Lacustre 1+
10.29.2021	1	989.001039770432	settore 2 serre oberti	Lacustre 1+
10.29.2021	1	989.001039770425	settore 2 serre oberti	Lacustre 1+
10.29.2021	1	989.001039769793	settore 2 serre oberti	Lacustre 1+
10.29.2021	1	989.001039770427	settore 2 serre oberti	Lacustre 1+
10.29.2021	1	989.001039769794	settore 2 serre oberti	Lacustre 1+
10.29.2021	1	989.001039770419	settore 2 serre oberti	Lacustre 1+
10.29.2021	1	989.001039769800	settore 2 serre oberti	Lacustre 1+
10.29.2021	1	989.001039770450	settore 2 serre oberti	Lacustre 1+
10.29.2021	1	989.001039770395	settore 2 serre oberti	Lacustre 1+
10.29.2021	1	989.001039769851	settore 2 serre oberti	Lacustre 1+
10.29.2021	1	989.001039770429	settore 2 serre oberti	Lacustre 1+
10.29.2021	1	989.001039769861	settore 2 serre oberti	Lacustre 1+
10.29.2021	1	989.001039770453	settore 2 serre oberti	Lacustre 1+
10.29.2021	1	989.001039769811	settore 2 serre oberti	Lacustre 1+
10.29.2021	1	989.001039770410	settore 2 serre oberti	Lacustre 1+
10.29.2021	1	989.001039769842	settore 2 serre oberti	Lacustre 1+
10.29.2021	1	989.001039770481	settore 2 serre oberti	Lacustre 1+
10.29.2021	1	989.001039769822	settore 2 serre oberti	Lacustre 1+
10.29.2021	1	989.001039770405	settore 2 serre oberti	Lacustre 1+
10.29.2021	1	989.001039770417	settore 2 serre oberti	Lacustre 1+
10.29.2021	1	989.001039769888	settore 2 serre oberti	Lacustre 1+
10.29.2021	1	989.001039770433	settore 2 serre oberti	Lacustre 1+
10.29.2021	1	989.001039769877	settore 2 serre oberti	Lacustre 1+
10.29.2021	1	989.001039770421	settore 2 serre oberti	Lacustre 1+
10.29.2021	1	989.001039769848	settore 2 serre oberti	Lacustre 1+
10.29.2021	1	989.001039770394	settore 2 serre oberti	Lacustre 1+
10.29.2021	1	989.001039770135	settore 2 serre oberti	Lacustre 1+
10.29.2021	1	989.001039769889	settore 2 serre oberti	Lacustre 1+
10.29.2021	1	989.001039770167	settore 2 serre oberti	Lacustre 1+
10.29.2021	1	989.001039769853	settore 2 serre oberti	Lacustre 1+
10.29.2021	1	989.001039770152	settore 2 serre oberti	Lacustre 1+
10.29.2021	1	989.001039769846	settore 2 serre oberti	Lacustre 1+
10.29.2021	1	989.001039770179	settore 2 serre oberti	Lacustre 1+
10.29.2021	1	989.001039770139	settore 2 serre oberti	Lacustre 1+
10.29.2021	1	989.001039770092	settore 2 serre oberti	Lacustre 1+
10.29.2021	1	989.001039769878	settore 2 serre oberti	Lacustre 1+
10.29.2021	1	989.001039770105	settore 2 serre oberti	Lacustre 1+
10.29.2021	1	989.001039769879	settore 2 serre oberti	Lacustre 1+
10.29.2021	1	989.001039770130	settore 2 serre oberti	Lacustre 1+
10.29.2021	1	989.001039769836	settore 2 serre oberti	Lacustre 1+
10.29.2021	1	989.001039770183	settore 2 serre oberti	Lacustre 1+
10.29.2021	1	989.001039769885	settore 2 serre oberti	Lacustre 1+
10.29.2021	1	989.001039769824	settore 2 serre oberti	Lacustre 1+
10.29.2021	1	989.001039770137	settore 2 serre oberti	Lacustre 1+
10.29.2021	1	989.001039769814	settore 2 serre oberti	Lacustre 1+
10.29.2021	1	989.001039770129	settore 2 serre oberti	Lacustre 1+
10.29.2021	1	989.001039769795	settore 2 serre oberti	Lacustre 1+
10.29.2021	1	989.001039769864	settore 2 serre oberti	Lacustre 1+
10.29.2021	1	989.001039770184	settore 2 serre oberti	Lacustre 1+
10.29.2021	1	989.001039769884	settore 2 serre oberti	Lacustre 1+
10.29.2021	1	989.001039770119	settore 2 serre oberti	Lacustre 1+
10.29.2021	1	989.001039769887	settore 2 serre oberti	Lacustre 1+
10.29.2021	1	989.001039770099	settore 2 serre oberti	Lacustre 1+
10.29.2021	1	989.001039769855	settore 2 serre oberti	Lacustre 1+
10.29.2021	1	989.001039769813	settore 2 serre oberti	Lacustre 1+
10.29.2021	1	989.001039770161	settore 2 serre oberti	Lacustre 1+
10.29.2021	1	989.001039770100	settore 2 serre oberti	Lacustre 1+
10.29.2021	1	989.001039770163	settore 2 serre oberti	Lacustre 1+
10.29.2021	1	989.001039770160	settore 2 serre oberti	Lacustre 1+
10.29.2021	1	989.001039769860	settore 2 serre oberti	Lacustre 1+
10.29.2021	1	989.001039770114	settore 2 serre oberti	Lacustre 1+
10.29.2021	1	989.001039769830	settore 2 serre oberti	Lacustre 1+
10.29.2021	1	989.001039770136	settore 2 serre oberti	Lacustre 1+
10.29.2021	1	989.001039769872	settore 2 serre oberti	Lacustre 1+
10.29.2021	1	989.001039769870	settore 3 penate	Lacustre 1+
10.29.2021	1	989.001039769856	settore 3 penate	Lacustre 1+
10.29.2021	1	989.001039770176	settore 3 penate	Lacustre 1+
10.29.2021	1	989.001039769871	settore 3 penate	Lacustre 1+
10.29.2021	1	989.001039770187	settore 3 penate	Lacustre 1+
10.29.2021	1	989.001039769843	settore 3 penate	Lacustre 1+
10.29.2021	1	989.001039769828	settore 3 penate	Lacustre 1+
10.29.2021	1	989.001039770144	settore 3 penate	Lacustre 1+
10.29.2021	1	989.001039769854	settore 3 penate	Lacustre 1+
10.29.2021	1	989.001039770109	settore 3 penate	Lacustre 1+
10.29.2021	1	989.001039770138	settore 3 penate	Lacustre 1+
10.29.2021	1	989.001039770006	settore 3 penate	Lacustre 1+
10.29.2021	1	989.001039770115	settore 3 penate	Lacustre 1+
10.29.2021	1	989.001039770028	settore 3 penate	Lacustre 1+
10.29.2021	1	989.001039770103	settore 3 penate	Lacustre 1+
10.29.2021	1	989.001039770020	settore 3 penate	Lacustre 1+
10.29.2021	1	989.001039770117	settore 3 penate	Lacustre 1+
10.29.2021	1	989.001039770042	settore 3 penate	Lacustre 1+
10.29.2021	1	989.001039770155	settore 3 penate	Lacustre 1+
10.29.2021	1	989.001039770084	settore 3 penate	Lacustre 1+
10.29.2021	1	989.001039770059	settore 3 penate	Lacustre 1+
10.29.2021	1	989.001039770132	settore 3 penate	Lacustre 1+
10.29.2021	1	989.001039770078	settore 3 penate	Lacustre 1+
10.29.2021	1	989.001039770145	settore 3 penate	Lacustre 1+
10.29.2021	1	989.001039770057	settore 3 penate	Lacustre 1+
10.29.2021	1	989.001039770111	settore 3 penate	Lacustre 1+
10.29.2021	1	989.001039770019	settore 3 penate	Lacustre 1+
10.29.2021	1	989.001039770093	settore 3 penate	Lacustre 1+
10.29.2021	1	989.001039770002	settore 3 penate	Lacustre 1+
10.29.2021	1	989.001039770128	settore 3 penate	Lacustre 1+
10.29.2021	1	989.001039770008	settore 3 penate	Lacustre 1+
10.29.2021	1	989.001039770141	settore 3 penate	Lacustre 1+
10.29.2021	1	989.001039770005	settore 3 penate	Lacustre 1+
10.29.2021	1	989.001039770110	settore 3 penate	Lacustre 1+
10.29.2021	1	989.001039769996	settore 3 penate	Lacustre 1+
10.29.2021	1	989.001039770166	settore 3 penate	Lacustre 1+
10.29.2021	1	989.001039770075	settore 3 penate	Lacustre 1+
10.29.2021	1	989.001039770097	settore 3 penate	Lacustre 1+
10.29.2021	1	989.001039770039	settore 3 penate	Lacustre 1+
10.29.2021	1	989.001039770081	settore 3 penate	Lacustre 1+
10.29.2021	1	989.001039769995	settore 3 penate	Lacustre 1+
10.29.2021	1	989.001039770170	settore 3 penate	Lacustre 1+
10.29.2021	1	989.001039770048	settore 3 penate	Lacustre 1+
10.29.2021	1	989.001039770162	settore 3 penate	Lacustre 1+
10.29.2021	1	989.001039770034	settore 3 penate	Lacustre 1+
10.29.2021	1	989.001039769999	settore 3 penate	Lacustre 1+
10.29.2021	1	989.001039770175	settore 3 penate	Lacustre 1+
10.29.2021	1	989.001039770036	settore 3 penate	Lacustre 1+
10.29.2021	1	989.001039770171	settore 3 penate	Lacustre 1+
10.29.2021	1	989.001039770087	settore 3 penate	Lacustre 1+
10.29.2021	1	989.001039770113	settore 3 penate	Lacustre 1+
10.29.2021	1	989.001039770045	settore 3 penate	Lacustre 1+
10.29.2021	1	989.001039770186	settore 3 penate	Lacustre 1+
10.29.2021	1	989.001039770116	settore 3 penate	Lacustre 1+
10.29.2021	1	989.001039770118	settore 3 penate	Lacustre 1+
10.29.2021	1	989.001039770140	settore 3 penate	Lacustre 1+
10.29.2021	1	989.001039770188	settore 3 penate	Lacustre 1+
10.29.2021	1	989.001039770151	settore 3 penate	Lacustre 1+
10.29.2021	1	989.001039770026	settore 3 penate	Lacustre 1+
10.29.2021	1	989.001039770107	settore 3 penate	Lacustre 1+
10.29.2021	1	989.001039770067	settore 3 penate	Lacustre 1+
10.29.2021	1	989.001039770181	settore 3 penate	Lacustre 1+
10.29.2021	1	989.001039770074	settore 3 penate	Lacustre 1+
10.29.2021	1	989.001039770108	settore 3 penate	Lacustre 1+
10.29.2021	1	989.001039769997	settore 3 penate	Lacustre 1+
10.29.2021	1	989.001039770101	settore 3 penate	Lacustre 1+
10.29.2021	1	989.001039770013	settore 3 penate	Lacustre 1+
10.29.2021	1	989.001039770156	settore 3 penate	Lacustre 1+
10.29.2021	1	989.001039770023	settore 3 penate	Lacustre 1+
10.29.2021	1	989.001039770169	settore 3 penate	Lacustre 1+
10.29.2021	1	989.001039770060	settore 3 penate	Lacustre 1+
10.29.2021	1	989.001039770120	settore 3 penate	Lacustre 1+
10.29.2021	1	989.001039770080	settore 3 penate	Lacustre 1+
10.29.2021	1	989.001039770094	settore 3 penate	Lacustre 1+
10.29.2021	1	989.001039770001	settore 3 penate	Lacustre 1+
10.29.2021	1	989.001039770134	settore 3 penate	Lacustre 1+
10.29.2021	1	989.001039770064	settore 3 penate	Lacustre 1+
10.29.2021	1	989.001039770088	settore 3 penate	Lacustre 1+
10.29.2021	1	989.001039770153	settore 3 penate	Lacustre 1+
10.29.2021	1	989.001039770007	settore 3 penate	Lacustre 1+
10.29.2021	1	989.001039770182	settore 3 penate	Lacustre 1+
10.29.2021	1	989.001039770157	settore 3 penate	Lacustre 1+
10.29.2021	1	989.001039769998	settore 3 penate	Lacustre 1+
10.29.2021	1	989.001039770037	settore 3 penate	Lacustre 1+
10.29.2021	1	989.001039770148	settore 3 penate	Lacustre 1+
10.29.2021	1	989.001039770055	settore 3 penate	Lacustre 1+
10.29.2021	1	989.001039770142	settore 3 penate	Lacustre 1+
10.29.2021	1	989.001039770077	settore 3 penate	Lacustre 1+
10.29.2021	1	989.001039770053	settore 3 penate	Lacustre 1+
10.29.2021	1	989.001039770149	settore 3 penate	Lacustre 1+
10.29.2021	1	989.001039770065	settore 3 penate	Lacustre 1+
10.29.2021	1	989.001039770143	settore 3 penate	Lacustre 1+
10.29.2021	1	989.001039769994	settore 3 penate	Lacustre 1+
10.29.2021	1	989.001039770096	settore 3 penate	Lacustre 1+
10.29.2021	1	989.001039770012	settore 3 penate	Lacustre 1+
10.29.2021	1	989.001039770168	settore 3 penate	Lacustre 1+
10.29.2021	1	989.001039770058	settore 3 penate	Lacustre 1+
10.29.2021	1	989.001039770003	settore 3 penate	Lacustre 1+
10.29.2021	1	989.001039770040	settore 3 penate	Lacustre 1+
10.29.2021	1	989.001039770024	settore 3 penate	Lacustre 1+
10.29.2021	1	989.001039770086	settore 3 penate	Lacustre 1+
10.29.2021	1	989.001039770070	settore 3 penate	Lacustre 1+
10.29.2021	1	989.001039770022	settore 4 tana	Lacustre 1+
10.29.2021	1	989.001039770062	settore 4 tana	Lacustre 1+
10.29.2021	1	989.001039770068	settore 4 tana	Lacustre 1+
10.29.2021	1	989.001039770121	settore 4 tana	Lacustre 1+
10.29.2021	1	989.001039770082	settore 4 tana	Lacustre 1+
10.29.2021	1	989.001039770032	settore 4 tana	Lacustre 1+
10.29.2021	1	989.001039770154	settore 4 tana	Lacustre 1+
10.29.2021	1	989.001039770046	settore 4 tana	Lacustre 1+
10.29.2021	1	989.001039770146	settore 4 tana	Lacustre 1+
10.29.2021	1	989.001039770035	settore 4 tana	Lacustre 1+
10.29.2021	1	989.001039770091	settore 4 tana	Lacustre 1+
10.29.2021	1	989.001039770066	settore 4 tana	Lacustre 1+
10.29.2021	1	989.001039770098	settore 4 tana	Lacustre 1+
10.29.2021	1	989.001039770025	settore 4 tana	Lacustre 1+
10.29.2021	1	989.001039770127	settore 4 tana	Lacustre 1+
10.29.2021	1	989.001039770056	settore 4 tana	Lacustre 1+
10.29.2021	1	989.001039770027	settore 4 tana	Lacustre 1+
10.29.2021	1	989.001039770165	settore 4 tana	Lacustre 1+
10.29.2021	1	989.001039770027	settore 4 tana	Lacustre 1+
10.29.2021	1	989.001039770085	settore 4 tana	Lacustre 1+
10.29.2021	1	989.001039770126	settore 4 tana	Lacustre 1+
10.29.2021	1	989.001039770089	settore 4 tana	Lacustre 1+
10.29.2021	1	989.001039770147	settore 4 tana	Lacustre 1+
10.29.2021	1	989.001039770033	settore 4 tana	Lacustre 1+
10.29.2021	1	989.001039770159	settore 4 tana	Lacustre 1+
10.29.2021	1	989.001039770051	settore 4 tana	Lacustre 1+
10.29.2021	1	989.001039770112	settore 4 tana	Lacustre 1+
10.29.2021	1	989.001039770052	settore 4 tana	Lacustre 1+
10.29.2021	1	989.001039770054	settore 4 tana	Lacustre 1+
10.29.2021	1	989.001039770125	settore 4 tana	Lacustre 1+
10.29.2021	1	989.001039770017	settore 4 tana	Lacustre 1+
10.29.2021	1	989.001039770104	settore 4 tana	Lacustre 1+
10.29.2021	1	989.001039770011	settore 4 tana	Lacustre 1+
10.29.2021	1	989.001039770102	settore 4 tana	Lacustre 1+
10.29.2021	1	989.001039770041	settore 4 tana	Lacustre 1+
10.29.2021	1	989.001039770073	settore 4 tana	Lacustre 1+
10.29.2021	1	989.001039770173	settore 4 tana	Lacustre 1+
10.29.2021	1	989.001039770004	settore 4 tana	Lacustre 1+
10.29.2021	1	989.001039770180	settore 4 tana	Lacustre 1+
10.29.2021	1	989.001039770122	settore 4 tana	Lacustre 1+
10.29.2021	1	989.001039770178	settore 4 tana	Lacustre 1+
10.29.2021	1	989.001039770124	settore 4 tana	Lacustre 1+
10.29.2021	1	989.001039769990	settore 4 tana	Lacustre 1+
10.29.2021	1	989.001039770063	settore 4 tana	Lacustre 1+
10.29.2021	1	989.001039770038	settore 4 tana	Lacustre 1+
10.29.2021	1	989.001039770095	settore 4 tana	Lacustre 1+
10.29.2021	1	989.001039770158	settore 4 tana	Lacustre 1+
10.29.2021	1	989.001039769993	settore 4 tana	Lacustre 1+
10.29.2021	1	989.001039770123	settore 4 tana	Lacustre 1+
10.29.2021	1	989.001039770069	settore 4 tana	Lacustre 1+
10.29.2021	1	989.001039770189	settore 4 tana	Lacustre 1+
10.29.2021	1	989.001039770014	settore 4 tana	Lacustre 1+
10.29.2021	1	989.001039770177	settore 4 tana	Lacustre 1+
10.29.2021	1	989.001039770043	settore 4 tana	Lacustre 1+
10.29.2021	1	989.001039770131	settore 4 tana	Lacustre 1+
10.29.2021	1	989.001039770009	settore 4 tana	Lacustre 1+
10.29.2021	1	989.001039770090	settore 4 tana	Lacustre 1+
10.29.2021	1	989.001039770072	settore 4 tana	Lacustre 1+
10.29.2021	1	989.001039770164	settore 4 tana	Lacustre 1+
10.29.2021	1	989.001039770185	settore 4 tana	Lacustre 1+
10.29.2021	1	989.001039770030	settore 4 tana	Lacustre 1+
10.29.2021	1	989.001039770133	settore 4 tana	Lacustre 1+
10.29.2021	1	989.001039770174	settore 4 tana	Lacustre 1+
10.29.2021	1	989.001039770000	settore 4 tana	Lacustre 1+
10.29.2021	1	989.001039770204	settore 4 tana	Lacustre 1+
10.29.2021	1	989.001039770277	settore 4 tana	Lacustre 1+
10.29.2021	1	989.001039770061	settore 4 tana	Lacustre 1+
10.29.2021	1	989.001039770252	settore 4 tana	Lacustre 1+
10.29.2021	1	989.001039770016	settore 4 tana	Lacustre 1+
10.29.2021	1	989.001039770260	settore 4 tana	Lacustre 1+
10.29.2021	1	989.001039769992	settore 4 tana	Lacustre 1+
10.29.2021	1	989.001039770245	settore 4 tana	Lacustre 1+
10.29.2021	1	989.001039770049	settore 4 tana	Lacustre 1+
10.29.2021	1	989.001039770197	settore 4 tana	Lacustre 1+
10.29.2021	1	989.001039770021	settore 4 tana	Lacustre 1+
10.29.2021	1	989.001039770221	settore 4 tana	Lacustre 1+
10.29.2021	1	989.001039770076	settore 4 tana	Lacustre 1+
10.29.2021	1	989.001039770275	settore 4 tana	Lacustre 1+
10.29.2021	1	989.001039770050	settore 4 tana	Lacustre 1+
10.29.2021	1	989.001039770266	settore 4 tana	Lacustre 1+
10.29.2021	1	989.001039770279	settore 4 tana	Lacustre 1+
10.29.2021	1	989.001039770071	settore 4 tana	Lacustre 1+
10.29.2021	1	989.001039770289	settore 4 tana	Lacustre 1+
10.29.2021	1	989.001039770083	settore 4 tana	Lacustre 1+
10.29.2021	1	989.001039770272	settore 4 tana	Lacustre 1+
10.29.2021	1	989.001039770079	settore 4 tana	Lacustre 1+
10.29.2021	1	989.001039770237	settore 4 tana	Lacustre 1+
10.29.2021	1	989.001039770044	settore 4 tana	Lacustre 1+
10.29.2021	1	989.001039770229	settore 4 tana	Lacustre 1+
10.29.2021	1	989.001039769991	settore 4 tana	Lacustre 1+
10.29.2021	1	989.001039770223	settore 4 tana	Lacustre 1+
10.29.2021	1	989.001039770010	settore 4 tana	Lacustre 1+
10.29.2021	1	989.001039770249	settore 4 tana	Lacustre 1+
10.29.2021	1	989.001039770253	settore 4 tana	Lacustre 1+
10.29.2021	1	989.001039770195	settore 4 tana	Lacustre 1+
10.29.2021	1	989.001039770031	settore 4 tana	Lacustre 1+
10.29.2021	1	989.001039770270	settore 4 tana	Lacustre 1+
10.29.2021	1	989.001039770018	settore 4 tana	Lacustre 1+
10.29.2021	1	989.001039770047	settore 4 tana	Lacustre 1+
10.29.2021	1	989.001039770029	settore 4 tana	Lacustre 1+
10.29.2021	1	989.001039770207	settore 4 tana	Lacustre 1+
10.29.2021	1	989.001039770202	settore 4 tana	Lacustre 1+
10.29.2021	1	989.001039770244	settore 4 tana	Lacustre 1+
10.29.2021	1	989.001039770246	settore 1 foce	Lacustre 1+
10.29.2021	1	989.001039770278	settore 1 foce	Lacustre 1+
10.29.2021	1	989.001039770210	settore 1 foce	Lacustre 1+
10.29.2021	1	989.001039770264	settore 1 foce	Lacustre 1+
10.29.2021	1	989.001039770269	settore 1 foce	Lacustre 1+
10.29.2021	1	989.001039770288	settore 1 foce	Lacustre 1+
10.29.2021	1	989.001039770192	settore 1 foce	Lacustre 1+
10.29.2021	1	989.001039770257	settore 1 foce	Lacustre 1+
10.29.2021	1	989.001039770276	settore 1 foce	Lacustre 1+
10.29.2021	1	989.001039770268	settore 1 foce	Lacustre 1+
10.29.2021	1	989.001039770224	settore 1 foce	Lacustre 1+
10.29.2021	1	989.001039770238	settore 1 foce	Lacustre 1+
10.29.2021	1	989.001039770201	settore 1 foce	Lacustre 1+
10.29.2021	1	989.001039770233	settore 1 foce	Lacustre 1+
10.29.2021	1	989.001039770261	settore 1 foce	Lacustre 1+
10.29.2021	1	989.001039770203	settore 1 foce	Lacustre 1+
10.29.2021	1	989.001039770205	settore 1 foce	Lacustre 1+
10.29.2021	1	989.001039770220	settore 1 foce	Lacustre 1+
10.29.2021	1	989.001039770241	settore 1 foce	Lacustre 1+
10.29.2021	1	989.001039770271	settore 1 foce	Lacustre 1+
10.29.2021	1	989.001039770256	settore 1 foce	Lacustre 1+
10.29.2021	1	989.001039770217	settore 1 foce	Lacustre 1+
10.29.2021	1	989.001039770225	settore 1 foce	Lacustre 1+
10.29.2021	1	989.001039770262	settore 1 foce	Lacustre 1+
10.29.2021	1	989.001039770193	settore 1 foce	Lacustre 1+
10.29.2021	1	989.001039770216	settore 1 foce	Lacustre 1+
10.29.2021	1	989.001039770219	settore 1 foce	Lacustre 1+
10.29.2021	1	989.001039770281	settore 1 foce	Lacustre 1+
10.29.2021	1	989.001039770222	settore 1 foce	Lacustre 1+
10.29.2021	1	989.001039770209	settore 1 foce	Lacustre 1+
10.29.2021	1	989.001039770251	settore 1 foce	Lacustre 1+
10.29.2021	1	989.001039770273	settore 1 foce	Lacustre 1+
10.29.2021	1	989.001039770285	settore 1 foce	Lacustre 1+
10.29.2021	1	989.001039770200	settore 1 foce	Lacustre 1+
10.29.2021	1	989.001039770265	settore 1 foce	Lacustre 1+
10.29.2021	1	989.001039770284	settore 1 foce	Lacustre 1+
10.29.2021	1	989.001039770240	settore 1 foce	Lacustre 1+
10.29.2021	1	989.001039770215	settore 1 foce	Lacustre 1+
10.29.2021	1	989.001039770230	settore 1 foce	Lacustre 1+
10.29.2021	1	989.001039770242	settore 1 foce	Lacustre 1+
10.29.2021	1	989.001039770214	settore 1 foce	Lacustre 1+
10.29.2021	1	989.001039770232	settore 1 foce	Lacustre 1+
10.29.2021	1	989.001039770258	settore 1 foce	Lacustre 1+
10.29.2021	1	989.001039770235	settore 1 foce	Lacustre 1+
10.29.2021	1	989.001039770234	settore 1 foce	Lacustre 1+
10.29.2021	1	989.001039770196	settore 1 foce	Lacustre 1+
10.29.2021	1	989.001039770227	settore 1 foce	Lacustre 1+
10.29.2021	1	989.001039770283	settore 1 foce	Lacustre 1+
10.29.2021	1	989.001039770211	settore 1 foce	Lacustre 1+
10.29.2021	1	989.001039770194	settore 1 foce	Lacustre 1+
10.29.2021	1	989.001039770206	settore 1 foce	Lacustre 1+
10.29.2021	1	989.001039770247	settore 1 foce	Lacustre 1+
10.29.2021	1	989.001039770274	settore 1 foce	Lacustre 1+
10.29.2021	1	989.001039770198	settore 1 foce	Lacustre 1+
10.29.2021	1	989.001039770228	settore 1 foce	Lacustre 1+
10.29.2021	1	989.001039770190	settore 1 foce	Lacustre 1+
10.29.2021	1	989.001039770236	settore 1 foce	Lacustre 1+
10.29.2021	1	989.001039770280	settore 1 foce	Lacustre 1+
10.29.2021	1	989.001039770254	settore 1 foce	Lacustre 1+
10.29.2021	1	989.001039770255	settore 1 foce	Lacustre 1+
10.29.2021	1	989.001039770231	settore 1 foce	Lacustre 1+
10.29.2021	1	989.001039770259	settore 1 foce	Lacustre 1+
10.29.2021	1	989.001039770239	settore 1 foce	Lacustre 1+
10.29.2021	1	989.001039770191	settore 1 foce	Lacustre 1+
10.29.2021	1	989.001039770199	settore 1 foce	Lacustre 1+
10.29.2021	1	989.001039770243	settore 1 foce	Lacustre 1+
10.29.2021	1	989.001039770286	settore 1 foce	Lacustre 1+
10.29.2021	1	989.001039770250	settore 1 foce	Lacustre 1+
10.29.2021	1	989.001039770248	settore 1 foce	Lacustre 1+
10.29.2021	1	989.001039770208	settore 1 foce	Lacustre 1+
10.29.2021	1	989.001039770282	settore 1 foce	Lacustre 1+
10.29.2021	1	989.001039770218	settore 1 foce	Lacustre 1+
10.29.2021	1	989.001039770287	settore 1 foce	Lacustre 1+
10.29.2021	1	989.001039770263	settore 1 foce	Lacustre 1+
10.29.2021	1	989.001039770226	settore 1 foce	Lacustre 1+
10.29.2021	1	989.001039770267	settore 1 foce	Lacustre 1+
10.29.2021	1	989.001039770212	settore 1 foce	Lacustre 1+
10.29.2021	1	989.001039770213	settore 1 foce	Lacustre 1+
10.29.2021	1	989.001039770317	settore 1 foce	Lacustre 1+
10.29.2021	1	989.001039770369	settore 1 foce	Lacustre 1+
10.29.2021	1	989.001039770326	settore 1 foce	Lacustre 1+
10.29.2021	1	989.001039770388	settore 1 foce	Lacustre 1+
10.29.2021	1	989.001039770334	settore 1 foce	Lacustre 1+
10.29.2021	1	989.001039770388	settore 1 foce	Lacustre 1+
10.29.2021	1	989.001039770322	settore 1 foce	Lacustre 1+
10.29.2021	1	989.001039770305	settore 1 foce	Lacustre 1+
10.29.2021	1	989.001039770362	settore 1 foce	Lacustre 1+
10.29.2021	1	989.001039770300	settore 1 foce	Lacustre 1+
10.29.2021	1	989.001039770333	settore 1 foce	Lacustre 1+
10.29.2021	1	989.001039770383	settore 1 foce	Lacustre 1+
10.29.2021	1	989.001039770299	settore 1 foce	Lacustre 1+
10.29.2021	1	989.001039770294	settore 1 foce	Lacustre 1+
10.29.2021	1	989.001039770386	settore 1 foce	Lacustre 1+
10.29.2021	1	989.001039770327	settore 1 foce	Lacustre 1+
10.29.2021	1	989.001039770366	settore 1 foce	Lacustre 1+
10.29.2021	1	989.001039770379	settore 1 foce	Lacustre 1+
10.29.2021	1	989.001039770382	settore 1 foce	Lacustre 1+
10.29.2021	1	989.001039770355	settore 1 foce	Lacustre 1+
10.29.2021	1	989.001039770302	settore 1 foce	Lacustre 1+
10.29.2021	1	989.001039770354	settore 1 foce	Lacustre 1+
10.29.2021	1	989.001039770336	settore 1 foce	Lacustre 1+
10.29.2021	1	989.001039770337	settore 1 foce	Lacustre 1+
10.29.2021	1	989.001039770358	settore 1 foce	Lacustre 1+
10.29.2021	1	989.001039770315	settore 1 foce	Lacustre 1+
10.29.2021	1	989.001039770306	settore 1 foce	Lacustre 1+
10.29.2021	1	989.001039770389	settore 1 foce	Lacustre 1+
10.29.2021	1	989.001039770367	settore 1 foce	Lacustre 1+

## Sheet: Wild
Date	Tag_ID	Length	Weight	Species	Fattore_did_condizione_"k"	Location		In this sheet you can find the data about wild fish marked during the electrofishing surveys.
06.04.2021	989.001039770711	185	63	trota fario	0.995005231674333	Serre		You can find the date of each marking session, and the release location (the same in which they were sampled).
06.04.2021	989.001039770747	198	79.5	trota fario	1.02416883867756	Serre
06.04.2021	989.001039770738	264	195.7	trota fario	1.06360175445919	Serre
06.04.2021	989.001039770761	197	81.0	trota fario	1.05946433221767	Serre
06.04.2021	989.001031446159	319	328	trota fario	1.0104196756559	Serre
06.04.2021	989.001039770736	176	57.0	trota fario	1.04553085086401	Serre
06.04.2021	989.001039770766	193	77.8	trota fario	1.08220034978162	Serre
06.04.2021	989.001039770780	220	91	trota fario	0.854620586025545	Serre
06.04.2021	989.001039770785	202	86	trota fario	1.04338440902222	Serre
06.04.2021	989.001039770767	227	122	trota fario	1.0429950783456	Serre
06.04.2021	989.001039770692	210	88.9	trota fario	0.959939531368103	Serre
06.04.2021	989.001039770776	207	80	trota fario	0.901942705668022	Serre
06.04.2021	989.001039770715	211	107	trota fario	1.13903327584586	Serre
06.04.2021	989.001039770786	185	65	trota fario	1.02659269934653	Serre
06.04.2021	989.001039770748	190	67	trota fario	0.976818778247558	Serre
06.04.2021	989.001039770754	168	46	trota fario	0.970130115538279	Serre
06.04.2021	989.001039770773	193	75.2	trota fario	1.04603427125421	Serre
06.04.2021	989.001039770789	204	100	trota fario	1.17790291818381	Serre
06.04.2021	989.001039770781	200	98.7	trota fario	1.23375	Serre
06.04.2021	989.001039770758	164	46.1	trota fario	1.04512775496583	Serre
06.04.2021	989.001039770745	176	47	trota fario	0.86210438580015	Serre
06.04.2021	989.001039770751	164	47	trota fario	1.06553155061592	Serre
06.04.2021	989.001039770735	166	43.2	trota fario	0.944407620320154	Serre
06.04.2021	989.001039770741	177	61.1	trota fario	1.10184729839125	Serre
06.04.2021	989.001039770746	191	63	trota fario	0.90414991896377	Serre
06.04.2021	989.001039770697	210	89	trota fario	0.961019328366267	Serre
06.04.2021	989.001039770727	185	53.4	trota fario	0.843385386847768	Serre
06.04.2021	989.001039770722	186	68.6	trota fario	1.06606892213283	Serre
06.04.2021	989.001039770720	139	28	trota fario	1.04259018125803	Serre
06.04.2021	989.001039770732	163	44.1	trota fario	1.01830007617623	Serre
06.04.2021	989.001039770694	150	35	trota fario	1.03703703703704	Serre
06.04.2021	989.001039770760	158	39	trota fario	0.988765594608134	Serre
06.04.2021	989.001039770782	174	54.6	trota fario	1.03644174741801	Serre
06.04.2021	989.001039770769	230	107	trota fario	0.879427960877784	Serre
06.04.2021	989.001039770704	164	45.9	trota fario	1.0405935781547	Piscina
06.04.2021	989.001039770756	175	50	trota fario	0.932944606413994	Piscina
06.04.2021	989.001039770762	174	53	trota fario	1.00606982807975	Piscina
06.04.2021	989.001039770777	162	42	trota fario	0.987880122158434	Piscina
06.04.2021	989.001039770710	146	34	trota fario	1.09249724305107	Piscina
06.04.2021	989.001039770770	129	19.5	trota fario	0.908375642675767	Piscina
06.04.2021	989.001039770702	254	164.9	trota fario	1.00628154012214	Piscina
06.04.2021	989.001039770739	272	182	trota fario	0.904408584368004	Piscina
06.04.2021	989.001039770757	171	46	trota fario	0.919961177638304	Piscina
06.04.2021	989.001039770717	176	54.5	trota fario	0.999674234598046	Piscina
06.04.2021	989.001039770763	146	28	trota fario	0.899703611924414	Piscina
06.04.2021	989.001039770750	140	25	trota fario	0.911078717201166	Piscina
06.04.2021	989.001039770753	133	19	trota fario	0.807604403059206	Piscina
06.04.2021	989.001039770709	135	23.0	trota fario	0.934816847025352	Piscina
06.04.2021	989.001039770706	180	61.5	trota fario	1.05452674897119	Piscina
06.04.2021	989.001039770691	178	55	trota fario	0.975220186986946	Piscina
06.04.2021	989.001039770713	182	58	trota fario	0.962085855214704	Piscina
06.04.2021	989.001039770740	186	58.9	trota fario	0.915327398157783	Piscina
06.04.2021	989.001039770721	146	27.7	trota fario	0.890063930368082	Piscina
06.04.2021	989.001039770698	196	71	trota fario	0.942953191272344	Piscina
06.04.2021	989.001039770718	173	46	trota fario	0.888422445645446	Piscina
06.04.2021	989.001039770734	174	45.3	trota fario	0.859904966264391	Piscina
06.04.2021	989.001039770768	137	27	trota fario	1.05003085924025	Piscina
06.04.2021	989.001039770729	140	32	trota fario	1.16618075801749	Piscina
06.04.2021	989.001039770749	135	22.9	trota fario	0.930752425951329	Piscina
06.04.2021	989.001039770764	123	17.3	trota fario	0.929674178756461	Piscina
06.04.2021	989.001039770716	257	174.6	trota fario	1.0285960906397	Piscina
06.04.2021	989.001039770733	235	119.8	trota fario	0.923109522938077	Piscina
06.04.2021	989.001039770771	189	68.1	trota fario	1.00869925342924	Piscina
06.04.2021	989.001031446692	219	95	trota fario	0.904463948495443	Piscina
06.04.2021	989.001039770693	292	260	trota fario	1.04429883526941	Piscina
06.04.2021	989.001039770700	247	138.5	trota fario	0.919091847004985	Piscina
06.04.2021	989.001039770759	200	80	trota fario	1	Piscina
06.04.2021	989.001039770690	164	45.4	trota fario	1.02925813612687	Piscina
06.04.2021	989.001039770731	167	41	trota fario	0.88030758376395	Piscina
06.04.2021	989.001039770743	168	40.2	trota fario	0.847809361839974	Piscina
06.04.2021	989.001039770744	170	43.5	trota fario	0.885406065540403	Piscina
06.04.2021	989.001039770778	156	32.0	trota fario	0.842900251184275	Piscina
06.04.2021	989.001039770714	135	22.5	trota fario	0.914494741655235	Piscina
06.04.2021	989.001039770728	130		trota fario	Field Error: Weight	Piscina
06.04.2021	989.001039770708	109	11	trota fario	0.849401828067171	Piscina
30.04.2021	989.001039770640	229	133.7	Trota fario	1.11333268770585	Antenna
30.04.2021	989.001039770655	222	117	Trota fario	1.06936739515264	Antenna
30.04.2021	989.001039770591	413	92.0	Trota fario	0.130598344691533	Antenna
30.04.2021	989.001039770594	187	68.7	Trota fario	1.05058674581597	Antenna
30.04.2021	989.001039770689	455	72.1	Trota fario	0.0765422236259092	Antenna
30.04.2021	989.001039770686	171	51.5	Trota fario	1.02995653583419	Antenna
30.04.2021	989.001039770636	174	50.8	Trota fario	0.964308438989648	Antenna
30.04.2021	989.001039770661	161	41.4	Trota fario	0.99202521948558	Antenna
30.04.2021	989.001039770643	208	83.7	Trota fario	0.930112440259444	Antenna
30.04.2021	989.001039770600	174	58.8	Trota fario	1.11616803568093	Antenna
30.04.2021	989.001039770645	188	69.9	Trota fario	1.05197066160677	Antenna
30.04.2021	989.001039770609	170	47.3	Trota fario	0.962751882760024	Antenna
30.04.2021	989.001039770622	169	45.6	Trota fario	0.944723522310496	Antenna
30.04.2021	989.001039770599	166	49.4	Trota fario	1.0799476028661	Antenna
30.04.2021	989.001039770660	160	41.9	Trota fario	1.02294921875	Antenna
30.04.2021	989.001039770657	170	50.6	Trota fario	1.02992061876654	Antenna
30.04.2021	989.001039770602	155	38.0	Trota fario	1.02044241549461	Antenna
30.04.2021	989.001039770669	218	113.9	Trota fario	1.09939622973694	Antenna
30.04.2021	989.001039770646	241	137.8	Trota fario	0.984460034030311	Antenna
30.04.2021	989.001039770635	190	87.3	Trota fario	1.27278028867182	Antenna
30.04.2021	989.001039770637	182	62.5	Trota fario	1.03673044742964	Antenna
30.04.2021	989.001039770638	172	58.8	Trota fario	1.15555863005773	Antenna
30.04.2021	989.001039770642	182	63.3	Trota fario	1.05000059715674	Antenna
30.04.2021	989.001039770662	168	58.1	Trota fario	1.22531651549509	Antenna
30.04.2021	989.001039770651	169	49.6	Trota fario	1.0275940067237	Antenna
30.04.2021	989.001039770615	161	45.1	Trota fario	1.08068447823188	Antenna
30.04.2021	989.001039770665	175	54.0	Trota fario	1.00758017492711	Antenna
30.04.2021	989.001039770603	160	41.7	Trota fario	1.01806640625	Antenna
30.04.2021	989.001039770621	147	32.7	Trota fario	1.02942745889137	Antenna
30.04.2021	989.001039770652	167	46.6	Trota fario	1.0005447171561	Antenna
30.04.2021	989.001039770628	152	38.8	Trota fario	1.10484400058318	Antenna
30.04.2021	989.001039770677	166	44.4	Trota fario	0.970641165329047	Antenna
30.04.2021	989.001039770650	159	36.5	Trota fario	0.908032706094193	Antenna
30.04.2021	989.001039770601	208	83.7	Trota fario	0.930112440259444	Antenna
30.04.2021	989.001039770647	172	47.5	Trota fario	0.933486988567044	Antenna
30.04.2021	989.001039770673	176	49.7	Trota fario	0.911629531367393	Antenna
30.04.2021	989.001039770680	164	47.8	Trota fario	1.08366825786045	Antenna
30.04.2021	989.001039770667	195	85.8	Trota fario	1.15713346482577	Antenna
30.04.2021	989.001039770658	151	38.2	Trota fario	1.1095133215663	Antenna
30.04.2021	989.001039770668	153	40.5	Trota fario	1.13078680145645	Antenna
30.04.2021	989.001039770606	147	32.3	Trota fario	1.01683507407313	Antenna
30.04.2021	989.001039770598	148	35.1	Trota fario	1.08273448759205	Antenna
30.04.2021	989.001039770611	130	25.1	Trota fario	1.14246700045517	Antenna
30.04.2021	989.001039770592	152	35.2	Trota fario	1.00233270155999	Antenna
30.04.2021	989.001039770627	157	41.2	Trota fario	1.0646289186807	Antenna
30.04.2021	989.001039770656	192	86.4	Trota fario	1.220703125	Antenna
30.04.2021	989.001039770676	237	130.8	Trota fario	0.982568203416859	Antenna
30.04.2021	989.001039770620	189	75.4	Trota fario	1.11682707354721	Antenna
30.04.2021	989.001039770595	193	67.7	Trota fario	0.941709044732849	Antenna
30.04.2021	989.001039770619	179	51.4	Trota fario	0.896198114880393	Antenna
30.04.2021	989.001039770607	175	54.1	Trota fario	1.00944606413994	Antenna
30.04.2021	989.001039770629	234	136.1	Trota fario	1.06221040913129	Antenna
30.04.2021	989.001039770614	191	69.6	Trota fario	0.998870386664736	Antenna
30.04.2021	989.001039770671	176	51.5	Trota fario	0.944646295078888	Antenna
30.04.2021	989.001039770649	161	45.7	Trota fario	1.09506165532587	Antenna
30.04.2021	989.001039770653	157	37.6	Trota fario	0.971603090834811	Antenna
30.04.2021	989.001039770612	167	49.0	Trota fario	1.05207491718131	Antenna
30.04.2021	989.001039770633	157	40.8	Trota fario	1.05429271558671	Antenna
30.04.2021	989.001039770631	150	32.2	Trota fario	0.954074074074074	Antenna
30.04.2021	989.001039770632	156	36.3	Trota fario	0.956164972437162	Antenna
30.04.2021	989.001039770616	163	43.1	Trota fario	0.995209371501036	Antenna
30.04.2021	989.001039770675	146	30.8	Trota fario	0.989673973116856	Antenna
30.04.2021	989.001039770624	173	57.4	Trota fario	1.1085967039141	Antenna
30.04.2021	989.001039770659	183	60.2	Trota fario	0.98229791464027	Antenna
30.04.2021	989.001039770687	155	39.1	Trota fario	1.0499815380484	Antenna
30.04.2021	989.001039770625	200	85.5	Trota fario	1.06875	Antenna
30.04.2021	989.001039770666	202	83.3	Trota fario	1.01062699152966	Antenna
30.04.2021	989.001039770617	179	68.2	Trota fario	1.18911889951056	Antenna
30.04.2021	989.001039770678	162	41.9	Trota fario	0.985528026629485	Antenna
30.04.2021	989.001039770674	180	60.5	Trota fario	1.03737997256516	Antenna
30.04.2021	989.001039770597	156	31.3	Trota fario	0.824461808189619	Antenna
30.04.2021	989.001039770626	170	56.0	Trota fario	1.13983309586811	Antenna
30.04.2021	989.001039770644	178	55.3	Trota fario	0.980539569825056	Antenna
30.04.2021	989.001039770679	163	43.1	Trota fario	0.995209371501036	Antenna
30.04.2021	989.001039770684	136	28.3	Trota fario	1.12504452473031	Antenna
30.04.2021	989.001039770685	159	38.4	Trota fario	0.955300162027864	Antenna
30.04.2021	989.001039770608	141	33.1	Trota fario	1.18078453322089	Antenna
30.04.2021	989.001039770648	168	49.1	Trota fario	1.03550844941151	Antenna
30.04.2021	989.001039770596	161	43.3	Trota fario	1.03755294694989	Antenna
30.04.2021	989.001039770654	161	38.5	Trota fario	0.922535530197942	Antenna
30.04.2021	989.001039770610	140	27.6	Trota fario	1.00583090379009	Antenna
30.04.2021	989.001039770590	147	29.5	Trota fario	0.928688380345428	Antenna
30.04.2021	989.001039770604	216	95.3	Trota fario	0.945652657115277	Antenna
30.04.2021	989.001039770623	198	72.5	Trota fario	0.93399045036633	Antenna
30.04.2021	989.001039770593	161	38.9	Trota fario	0.932120314927272	Antenna
30.04.2021	989.001039770682	169	44.3	Trota fario	0.917790614876205	Antenna
30.04.2021	989.001039770663	166	51.3	Trota fario	1.12148404913018	Antenna
30.04.2021	989.001039770683	205	80.2	Trota fario	0.930920909447048	Antenna
30.04.2021	989.001039770641	160	39.6	Trota fario	0.966796875	Antenna
30.04.2021	989.001039770630	187	69.6	Trota fario	1.06434989095766	Antenna
30.04.2021	989.001039770688	145	31.4	Trota fario	1.02997252859896	Antenna
30.04.2021	989.001039770639	226	114.7	Trota fario	0.993660670165646	Antenna
30.04.2021	989.001039770613	170	52.3	Trota fario	1.06452269489111	Antenna
30.04.2021	989.001039770618	181	62.1	Trota fario	1.04726327844673	Antenna
30.04.2021	989.001039770670	171	48.8	Trota fario	0.975958814538026	Antenna
30.04.2021	989.001039770672	158	38.5	Trota fario	0.976089112625979	Antenna
30.04.2021	989.001039770634	174	55.8	Trota fario	1.0592206869217	Antenna
30.04.2021	989.001039770521	187	69.1	Trota fario	1.05670369921227	Antenna
30.04.2021	989.001039770492	142	29.2	Trota fario	1.0198065999648	Antenna
30.04.2021	989.001039770556	207	78.9	Trota fario	0.889540993465087	Antenna
30.04.2021	989.001039770493	154	39.7	Trota fario	1.08699699693122	Antenna
30.04.2021	989.001039770569	169	49.4	Trota fario	1.02345048250304	Antenna
30.04.2021	989.001039770580	140	28.7	Trota fario	1.04591836734694	Antenna
30.04.2021	989.001039770490	210	86.8	Trota fario	0.937263794406652	Antenna
30.04.2021	989.001039770539	159	39.5	Trota fario	0.98266553125262	Antenna
30.04.2021	989.001039770586	228	117.7	Trota fario	0.993051843212216	Antenna
30.04.2021	989.001039770546	180	56.9	Trota fario	0.975651577503429	Antenna
30.04.2021	989.001039770553	210	99.0	Trota fario	1.0689990281827	Antenna
30.04.2021	989.001039770515	149	33.5	Trota fario	1.01271210650466	Antenna
30.04.2021	989.001039770544	218	101.2	Trota fario	0.976812102277246	Antenna
30.04.2021	989.001039770557	185	69.5	Trota fario	1.09766450160899	Antenna
30.04.2021	989.001039770567	188	68.4	Trota fario	1.02939618388989	Antenna
30.04.2021	989.001039770509	147	32.3	Trota fario	1.01683507407313	Antenna
30.04.2021	989.001039770566	146	35.0	Trota fario	1.12462951490552	Antenna
30.04.2021	989.001039770538	183	67.8	Trota fario	1.10630894705333	Antenna
30.04.2021	989.001039770547	163	47.7	Trota fario	1.10142661300695	Antenna
30.04.2021	989.001039770528	152	40.0	Trota fario	1.1390144335909	Antenna
30.04.2021	989.001039770552	161	47.9	Trota fario	1.14777797133718	Antenna
30.04.2021	989.001039770533	170	54.5	Trota fario	1.10930185222878	Antenna
30.04.2021	989.001039770572	148	33.2	Trota fario	1.02412492843464	Antenna
30.04.2021	989.001039770542	153	37.0	Trota fario	1.0330644852812	Antenna
30.04.2021	989.001039770549	134	23.4	Trota fario	0.972526540831152	Antenna
30.04.2021	989.001039770561	123	20.2	Trota fario	1.0855155150798	Antenna
30.04.2021	989.001039770495	434	852.9	Trota fario	1.04334737054933	Antenna
30.04.2021	989.001039770555	164	42.5	Trota fario	0.963512572365462	Antenna
30.04.2021	989.001039770518	230	138.8	Trota fario	1.1407906632695	Antenna
30.04.2021	989.001039770579	215	116.4	Trota fario	1.17121762863647	Antenna
30.04.2021	989.001039770530	235	155	Trota fario	1.19434036774125	Antenna
30.04.2021	989.001039770571	226	134.4	Trota fario	1.16432427262653	Antenna
30.04.2021	989.001039770503	314	361.5	Trota fario	1.16766794327388	Antenna
30.04.2021	989.001039770563	269	220.3	Trota fario	1.13176864306283	Antenna
30.04.2021	989.001039770510	255	188.4	Trota fario	1.13621457810344	Antenna
30.04.2021	989.001039770540	200	87.8	Trota fario	1.0975	Antenna
30.04.2021	989.001039770522	235	139.2	Trota fario	1.07259470444892	Antenna
30.04.2021	989.001039770548	212	107.3	Trota fario	1.12613936336708	Antenna
30.04.2021	989.001039770585	150	33.6	Trota fario	0.995555555555556	Antenna
30.04.2021	989.001039770513	251	204.0	Trota fario	1.29005730700158	Antenna
30.04.2021	989.001039770577	338	401.9	Trota fario	1.04080149017705	Antenna
30.04.2021	989.001039770570	260	198.1	Trota fario	1.12710514337733	Antenna
14.12.2021	989.001031447193	280	246.1	trota fario	1.12108236151604	mixed
14.12.2021	989.001031447176	222	98.1	trota fario	0.89662343132029	mixed
14.12.2021	989.001031447133	187	67.4	trota fario	1.03070664727796	mixed
14.12.2021	989.001031447178	253	164.4	trota fario	1.01517344676764	mixed
14.12.2021	989.001031447182	241	150.9	trota fario	1.07804803436266	mixed
14.12.2021	989.001031447174	247	153.4	trota fario	1.01796887603296	mixed
14.12.2021	989.001039770437	220	117.6	trota fario	1.10443275732532	mixed
14.12.2021	989.001031447127	235	123.7	trota fario	0.953160667674793	mixed
14.12.2021	989.001031447172	257	183.0	trota fario	1.07808181321343	mixed
14.12.2021	989.001031447353	240	144.5	trota fario	1.04528356481481	mixed
14.12.2021	989.001031447187	267	175.1	trota fario	0.91992487402782	mixed
14.12.2021	989.001031447366	206	105.4	trota fario	1.20569913619779	mixed
